# Supplementary material
Source: PubMed Central journal article supplement (PMC9679962)
Supplement: jamapediatr-e224401-s001.pdf [file jamapediatr-e224401-s001.pdf]

1  
2  
3  
4  
5  
6  
7  
8  
9  
10  
11  
12  
13  
14  
15  
16  
17  
18  
19  
20  
21

Vitamin C to Decrease the Effects of Smoking in Pregnancy on  
Infant Lung Function (VCSIP):  
A Randomized Trial  
Protocol

Exemption for IND obtained from FDA

Funded by the National Heart, Lung & Blood Institute  
and the Office of Dietary Supplements  
National Institutes of Health  
Bethesda, Maryland

Prepared by the Clinical and Data Coordinating Center  
Oregon Health & Science University  
Departments of Pediatrics and Clinical Epidemiology & Medical Informatics  
3181 SW Sam Jackson Park Rd.  
Portland, OR 97239

22  
23  
24  
25  
26  
27  
28  
29  
30  
31  
32  
33  
34  
35  
36  
37  
38  
39  
40  
41  
42  
43  
44  
45  
46  
47  
48  
49  
50  
51  
52  
53  
54  
55  
56  
57  
58  
59  
60  
61  
62

## TABLE OF CONTENTS

|                                                                           |    |
|---------------------------------------------------------------------------|----|
| 1. Introduction .....                                                     | 5  |
| 1.1 Study Abstract.....                                                   | 5  |
| 1.2 Primary Hypothesis .....                                              | 5  |
| 1.3 Purpose of the Study Protocol.....                                    | 5  |
| 2. Background .....                                                       | 5  |
| 2.1 Introduction / Significance .....                                     | 5  |
| 2.2.1 General Background .....                                            | 6  |
| 2.2.2 Pilot Vitamin C Studies .....                                       | 8  |
| 2.3 Safety of Vitamin C Therapy .....                                     | 9  |
| 2.2 Background Studies .....                                              | 6  |
| 2.4 Rationale for a Randomized Clinical Trial .....                       | 10 |
| 3. Study Design .....                                                     | 10 |
| 3.1 Primary Research Aim .....                                            | 10 |
| 3.2 Secondary Research Aims .....                                         | 10 |
| 3.3 Study Design Summary.....                                             | 11 |
| 3.4 Eligibility Criteria .....                                            | 11 |
| 3.4.1 Inclusion Criteria.....                                             | 11 |
| 3.4.1.1 Gestational Age Determination.....                                | 12 |
| 3.4.2 Exclusion Criteria at Randomization.....                            | 13 |
| 3.5 Informed Consent.....                                                 | 13 |
| 3.6 Randomization Method and Masking .....                                | 14 |
| 4. Study Procedures.....                                                  | 15 |
| 4.1 Screening for Eligibility .....                                       | 15 |
| 4.2 Baseline Procedures .....                                             | 15 |
| 4.3 Patient Management and Follow-Up .....                                | 16 |
| 4.4 Prenatal Study Visit Procedure.....                                   | 16 |
| 4.4.1 Administration of Validated Smoking and Respiratory Questionnaire . | 17 |
| 4.4.2 Urine Cotinine Testing .....                                        | 17 |
| 4.4.3 Plasma Vitamin C Testing .....                                      | 17 |
| 4.4.4 Hair Nicotine Testing .....                                         | 17 |
| 4.4.5 Carbon Monoxide Testing .....                                       | 17 |
| 4.4.6 Study Medication Compliance .....                                   | 18 |
| 4.4.7 Side Effects .....                                                  | 18 |
| 4.4.8 Placental Blood Flow .....                                          | 18 |
| 4.4.9 Genotyping-Blood and Buccal Swabs .....                             | 18 |
| 4.5 Procedures at Labor and Delivery .....                                | 19 |
| 4.5.1 Maternal Data Collection .....                                      | 19 |

|     |                                                                    |    |
|-----|--------------------------------------------------------------------|----|
| 63  | 4.5.2 Neonatal Data Collection.....                                | 19 |
| 64  | 4.6 Infant Follow-Up and Procedures.....                           | 19 |
| 65  | 4.6.1 Infant Respiratory Questionnaire.....                        | 19 |
| 66  | 4.6.2 Infant Pulmonary Function Tests.....                         | 20 |
| 67  | 4.7 Adverse Event Reporting.....                                   | 20 |
| 68  | 4.7.1 Adverse Event Collection, Review, and Grading.....           | 20 |
| 69  | 4.7.2 Unanticipated Problems.....                                  | 20 |
| 70  | 4.7.3 Reporting of Adverse Events.....                             | 21 |
| 71  | 4.7.3.1 Expedited Reporting.....                                   | 21 |
| 72  | 4.7.3.2 Periodic Summary Reporting.....                            | 22 |
| 73  | 4.7.3.3 Expected Risks.....                                        | 22 |
| 74  | 4.8 Study Outcome Measures.....                                    | 22 |
| 75  | 4.8.1 Primary Outcome.....                                         | 22 |
| 76  | 4.8.2 Secondary Outcome, Incidence of Wheezing.....                | 23 |
| 77  | 4.8.3 Secondary Outcome, PFTs at 12 months of age.....             | 23 |
| 78  | 4.8.4 Other Fetal, Neonatal, and Infant Outcomes.....              | 23 |
| 79  | 4.8.5 Other Maternal/Pregnancy Infants Outcomes.....               | 24 |
| 80  | 5. Statistical Considerations.....                                 | 24 |
| 81  | 5.1 Sample Size and Power.....                                     | 25 |
| 82  | 5.2 Interim Analysis.....                                          | 28 |
| 83  | 5.3 Analysis Plan.....                                             | 29 |
| 84  | 5.3.1 Analysis of Primary Outcome.....                             | 29 |
| 85  | 5.3.2 Supplemental Analyses.....                                   | 29 |
| 86  | 5.3.2.1 Missing Data.....                                          | 29 |
| 87  | 5.3.2.2 Pre-defined Subgroup Analyses for Comparison of FEF75..... | 30 |
| 88  | 5.3.2.3 Additional Pulmonary Function Tests.....                   | 30 |
| 89  | 5.3.2.4 Futility Analyses.....                                     | 30 |
| 90  | 5.3.2.5 Primary Analysis of Wheezing.....                          | 30 |
| 91  | 5.3.2.6 Additional Clinical Outcomes.....                          | 31 |
| 92  | 5.3.2.7 Infant Pulmonary Function Testing at 12 Months of Age..... | 31 |
| 93  | 6. Data Collection.....                                            | 31 |
| 94  | 6.1 Data Collection Forms.....                                     | 31 |
| 95  | 6.2 Data Entry.....                                                | 31 |
| 96  | 6.3 Data Management.....                                           | 32 |
| 97  | 6.4 Performance Monitoring.....                                    | 32 |
| 98  | 7. Study Administration.....                                       | 33 |
| 99  | 7.1 Organization and Funding.....                                  | 33 |
| 100 | 7.1.1 Participating Clinical Centers.....                          | 33 |
| 101 | 7.1.2 Data Coordinating Center.....                                | 33 |
| 102 | 7.2 Committees.....                                                | 33 |
| 103 | 7.2.1 Steering Committee.....                                      | 33 |
| 104 | 7.2.2 Data Safety Monitoring Board.....                            | 33 |
| 105 | 8. Study Timeline.....                                             | 34 |

|     |                                                                      |    |
|-----|----------------------------------------------------------------------|----|
| 106 | Figure 1. Timeline.....                                              | 34 |
| 107 | 8.1 Training and Certification .....                                 | 34 |
| 108 | 8.2 Recruitment and Data Collection Period .....                     | 34 |
| 109 | 8.3 Final Analysis .....                                             | 34 |
| 110 |                                                                      |    |
| 111 | References.....                                                      | 35 |
| 112 |                                                                      |    |
| 113 | Tables:                                                              |    |
| 114 | Table 1. Newborn PFT Results .....                                   | 8  |
| 115 | Table 2. Summary of Screening and Baseline Procedures .....          | 16 |
| 116 | Table 3. Sample Size for PFTs .....                                  | 26 |
| 117 | Table 4. Sample Size for Wheezing .....                              | 28 |
| 118 | Table 5. Potential Recruitments for Study .....                      | 34 |
| 119 |                                                                      |    |
| 120 | Figures:                                                             |    |
| 121 | Figure 1. Forced Expiratory Flows in Non-Human Primates .....        | 8  |
| 122 | Figure 2. Incidence of Wheeze through 1 year of age-pilot data ..... | 9  |
| 123 | Figure 3. Maternal Plasma Vitamin C Levels .....                     | 9  |
| 124 | Figure 4. Study overview .....                                       | 12 |
| 125 | Figure 5. Projected Study Recruitment.....                           | 27 |
| 126 | Figure 6. Entry Workflow .....                                       | 31 |
| 127 | Figure 7. Study Timeline .....                                       | 34 |
| 128 |                                                                      |    |
| 129 | Appendix A. Design Summary                                           |    |
| 130 | Appendix B. Study Visit Flow Sheet                                   |    |
| 131 | Appendix C. Sample Consent Forms                                     |    |
| 132 |                                                                      |    |
| 133 |                                                                      |    |
| 134 |                                                                      |    |
| 135 |                                                                      |    |
| 136 |                                                                      |    |
| 137 |                                                                      |    |
| 138 |                                                                      |    |
| 139 |                                                                      |    |
| 140 |                                                                      |    |

141

## 1. Introduction

### 1.1 Study Abstract

143 Despite strong anti-smoking efforts, at least 12% of American women do not/ can not  
144 quit smoking when pregnant, resulting in more than 450,000 smoke-exposed infants  
145 born yearly (1). Smoking during pregnancy is the largest preventable cause of low birth  
146 weight, prematurity and perinatal mortality (2). Maternal smoking during pregnancy is  
147 also the largest preventable cause of childhood respiratory illness (3-5). Recent studies  
148 have shown a protective effect of vitamin C supplementation on the lung function of  
149 offspring exposed to in-utero smoke in both a non human primate model (6) and a pilot  
150 trial in humans (7). The purpose of this randomized, controlled intervention trial is to  
151 evaluate the pulmonary function at 3 months of age in infants delivered to smoking  
152 mothers who are randomized to 500 mg/day of supplemental vitamin C versus placebo  
153 during pregnancy.

### 1.2 Primary Hypothesis

155 Vitamin C supplementation (500 mg/day) during pregnancy will block the adverse  
156 effects of maternal smoking on infant pulmonary function measured at 3 months of age  
157 (forced expiratory flows) in infants born to smoking mothers.

### 1.3 Purpose of the Study Protocol

159 This protocol serves as a road map for the execution of the Vitamin C to Decrease the  
160 Effects of Smoking in Pregnancy on Infant Lung Function Study (VCSIP). It describes  
161 the background, rationale, design and organization of this randomized, double-blind,  
162 placebo-controlled dietary intervention trial, and may be considered as a written  
163 agreement among the study centers and investigators. It will be reviewed by the Study  
164 Steering Committee, the Study Data Coordinating Center (DCC), the institutional IRBs  
165 as well as the Data and Safety Monitoring Board (DSMB) appointed by the NHLBI. Any  
166 significant changes to the protocol during the study require the approval of the Steering  
167 Committee, the NHLBI, the DSMB.

168 A manual of operating procedures (MOP) will supplement the protocol and includes  
169 detailed information on the execution of the study and all procedures used.

170

171

## 2. Background

### 2.1 Introduction and Significance

173 Smoking during pregnancy is the largest preventable cause of low birth weight,  
174 prematurity and perinatal mortality (2). It is also the largest preventable cause of  
175 childhood respiratory illness, and children whose mothers smoked during pregnancy  
176 show lifetime decreases in pulmonary function and increased respiratory illnesses and  
177 asthma (2, 4, 5). Maternal smoking is estimated to cause 10% of direct medical  
178 expenditures in the first year of life (8), and Stoddard and Gray (9) estimated that

179 approximately 20% of expenditures for childhood respiratory illness are caused by  
180 maternal smoking amounting to \$660 million annually in 1997 dollars. Several studies  
181 have now clearly linked maternal smoking during pregnancy to increased childhood  
182 respiratory illness (5).

## 183 184 **2.2 Background Studies**

### 185 186 **2.2.1 General Background**

187  
188 One of the initial reports indicating a connection between maternal smoking and  
189 children's respiratory function was from Tager et al, (10) who reported decreases of 7-  
190 10% in the forced expiratory volume in one second (FEV<sub>1</sub>) in children 1-5 years of age  
191 with smoking mothers. Hanrahan et al, (11) examined pulmonary function of infants  
192 shortly after birth (~4.2 weeks) as a function of maternal smoking during pregnancy and  
193 found a significant decrease in maximal expiratory flow at functional residual capacity  
194 (VmaxFRC). Similarly Hoo et al, (12) found a significantly decreased time to peak tidal  
195 expiratory flow to expiratory time ratio (TPTEF:TE) in premature infants studied at a  
196 corrected gestational age of 36 weeks whose mothers smoked during pregnancy. Milner  
197 et al, (13) studied 100 infants delivered to non-smoking women and 189 born to  
198 smokers. They showed a significantly decreased respiratory system compliance (Crs) in  
199 infants born to smoking mothers. In a follow-up study, Tager et al, (14) showed that the  
200 decreased VmaxFRC seen with prenatal smoke exposure correlated directly with  
201 increased lower respiratory illnesses (LRI). Cunningham et al, (15) performed  
202 pulmonary function test (PFT)s on 8800 non smoking school children aged 8-12 and  
203 similarly found reduced forced expiratory flows in children whose mothers smoked  
204 during pregnancy, suggesting that deficits continued at least until adolescence. A  
205 recent prospective study with a 21 year follow up has now extended the decreases in  
206 FEV<sub>1</sub> and FEF<sub>25-75</sub> (forced expiratory flows between 25% and 75% of FVC [forced vital  
207 capacity]) to 21 years of age in males (4). In multiple other studies; Brown et al,(16);  
208 Stick et al, (17); Lodrup et al, (18); and Li et al, (19) have all found decreased  
209 expiratory flows in infants and children born to smoking mothers. Therefore evidence  
210 indicates that the influence of smoking in pregnancy persist through early adult life.

211  
212 Several studies have shown that decreased pulmonary function in infants correlate with  
213 increased rates of respiratory illness (14, 20-25). Measurements of TPTEF:TE, Crs and  
214 forced expiratory flows (VmaxFRC, FEF<sub>25-75</sub>,) early in infancy are important predictors of  
215 later respiratory outcomes. One of the largest trials was a prospective birth cohort study  
216 of 802 healthy babies in Norway (23) with follow-up from the newborn period through 10  
217 years of age. This study demonstrated that infants with measurements of TPTEF:TE at or  
218 below the median shortly after birth were significantly more likely at 10 years of age to  
219 have a history of asthma (24.3% vs 16.2%, p=0.01; OR of 1.58); have current asthma  
220 (14.6% vs 7.5%, p=0.005; OR of 2.10); and to have severe bronchial  
221 hyperresponsiveness (9.1% vs 4.9%, p=0.05) (23). From this same cohort, infants  
222 whose Crs was at or below the median shortly after birth were significantly more likely to  
223 have a history of asthma (27.4% vs 14.8%,p=0.001; OR of 2.18) and current asthma  
224 (15.0% vs 7.7%, p=0.009; OR of 2.01). An increased risk of wheezing in the first years

225 of life has been reported in children with a decreased ratio of TPTEF:TE measured in the  
226 first week of life (24) or at 3 months of age (21, 24), and in those with reduced  
227 VmaxFRC at 1, 3, and 6 months of age (14, 21, 25, 26). Another population based  
228 longitudinal study demonstrated that infants less than six months of age with a  
229 decreased VmaxFRC developed wheezing lower respiratory tract illnesses in the first  
230 year of life (14).

231 Consistent with this, multiple studies have shown increased lower respiratory illness in  
232 infants born of mothers who smoke (27-30). Taylor and Wadsworth (29) studied 12,743  
233 children and found significantly increased bronchitis and hospital admissions for lower  
234 respiratory illness in children from smoking mothers. Tager et al. (14) similarly found  
235 increased lower respiratory illness in infants with prenatal smoke exposure but not with  
236 postnatal. Other studies have also demonstrated increased wheezing and asthma in  
237 children born of mothers who smoked during pregnancy (16, 31-33). Thus maternal  
238 smoking during pregnancy clearly leads to altered lung development manifested by  
239 impaired pulmonary function and reflected in turn by increased respiratory illness.

240  
241 Recent studies have also indicated the key role of genotype relative to the development  
242 of asthma, sensitivity to maternal smoking and difficulty in quitting smoking. Notably  
243 several common polymorphisms are linked in terms of sensitivity of offspring to  
244 maternal smoking. In particular common deletions or structural polymorphisms in the  
245 glutathione transferase (GST) genes increase both the risk of asthma and sensitivity of  
246 the fetus to maternal smoking (34-38). The GST genes play a key role in antioxidant  
247 defense. Similarly, the common structural polymorphism of the  $\alpha 5$  nicotinic receptor in  
248 which residue 398 is mutated from an Asp to an Asn (rs16969968) increases nicotine  
249 addiction, makes quitting more difficult, and increases risk of lung cancer and COPD  
250 (39).

251  
252 Given the above, the obvious question is: why can't pregnant women stop smoking and  
253 if they don't, why should we invest limited research dollars? The reality is that smoking  
254 is a unique morbidity in that it is addictive, heavily advertised (40-42) and certain  
255 genotypes significantly increase the likelihood of nicotine addiction / failure to quit (43-  
256 45). Teen pregnancy, low income, low education, and living with a smoker are  
257 important factors increasing the odds of smoking during pregnancy (46-49). It is  
258 particularly tragic that infants are victimized through no fault of their own by the  
259 addiction of their mothers caused in part by socioeconomic class, advertising, and  
260 genetics. Given nicotine's addictive nature, the low socio-economics of this population,  
261 and the constant advertising by tobacco companies, smoking during pregnancy will  
262 continue to adversely affect millions of babies worldwide. Recent CDC statistics show  
263 that decreases in smoking rates have plateaued and smoking rates have even  
264 increased in recent years for teenagers (50). This unfortunate reality makes finding  
265 ways to lessen the effect of smoking during pregnancy of vital importance.

266

267

268

269 **2.2.2 Pilot Vitamin C Studies**

270 Our underlying hypothesis is that the effect of *in utero* smoke exposure on lung  
 271 development is mediated by oxidant mechanisms and therefore can be prevented by  
 272 maternal vitamin C supplementation. A primary mediator of smoking-induced oxidant

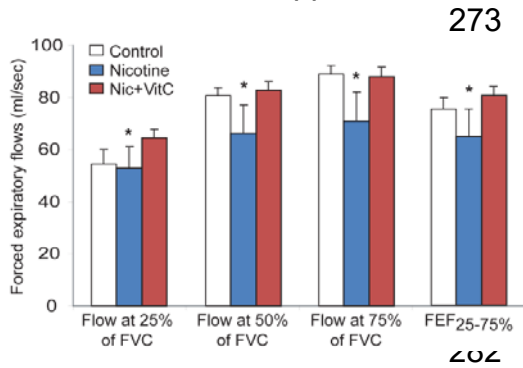

273 injury is nicotine (51-54). Consistent with this as  
 shown in Figure 1, prenatal nicotine exposure in  
 pregnant rhesus monkeys leads to decreased  
 pulmonary function of offspring similar to that  
 caused by maternal smoking, and the effects  
 were decreased by maternal vitamin C  
 supplementation. Vitamin C also prevented the  
 effects of nicotine on lung surfactant and elastin  
 expression. These results were published in the  
*Am J Respir Crit Care Med* (6).

283 **Figure 1.** Forced expiratory flows in animals treated as shown (Mean ± SEM). \**p*<.05 for overall  
 284 comparison of Nicotine-treated group to control and Nicotine + vitamin C-treated groups by  
 285 MANOVA. FEF<sub>25%-75%</sub> = the average flow between 25% and 75% of forced expired volume. N=  
 286 20 total animals (6).  
 287

288 Based on the results shown in Figure1, Dr. McEvoy performed a trial randomizing  
 289 pregnant smokers in a double blind design to 500 mg vitamin C /day or placebo; a  
 290 reference group of non smokers was also included. We chose a 500 mg vitamin C dose  
 291 as that is the lowest dose that will saturate the vitamin C plasma receptors and it is well  
 292 within the dosage range of vitamin C generally considered safe (55). Patients were  
 293 monitored for medication compliance by fasting plasma ascorbic acid levels and pill  
 294 counts; urine cotinine levels were monitored for nicotine exposure. At 24-48 hours of  
 295 age, pulmonary function testing was performed to assess tidal breathing (including the  
 296 ratio of TPTEF:TE and passive respiratory system compliance (Crs). As shown in  
 297 Table 1, in analysis of 235 infants (159 born to randomized smokers and 76 born to  
 298 non smokers), maternal smoking during pregnancy caused the expected decrease in  
 299 Crs; and the downward trend was reversed by vitamin C. In addition, this dose of  
 300 supplemental vitamin C (500 mg) blocked the maternal smoking-induced changes in the  
 301 newborn’s tidal breathing as measured by TPTEF:TE (*p*<.01).  
 302  
 303

**Table 1.** Newborn Pulmonary Function Test Results

|                                   | Newborns of non smokers (n=76) | Newborns of placebo treated smokers (n=83) | Newborns of vitamin C treated smokers (n=76) | P value for treatment groups | 95% CI for difference in means in treated groups |
|-----------------------------------|--------------------------------|--------------------------------------------|----------------------------------------------|------------------------------|--------------------------------------------------|
| Respiratory rate (bpm)            | 53 ± 12                        | 57 ± 12                                    | 57 ± 12                                      | 0.944                        | (-3.98, 3.71)                                    |
| TPTEF:TE                          | 0.399 ± 0.077                  | 0.345 ± 0.078                              | 0.383 ± 0.084*                               | <0.01                        | (0.01, 0.06)                                     |
| Crs/kg (mL/cmH <sub>2</sub> O/kg) | 1.36 ± 0.30                    | 1.20 ± 0.24                                | 1.32 ± 0.30*                                 | <0.01                        | (0.03, 0.21)                                     |



304 Mean  $\pm$  SD; p values and 95% confidence intervals adjusted for gestational age at  
 305 randomization ( $>16$  weeks vs  $\leq 16$  weeks)  
 306 Infant follow-up showed that through one year of age, vitamin C supplementation also  
 307 decreased the incidence of wheezing seen in the offspring of smokers ( $p=0.065$ ). See  
 308 Figure 2. These latter data are preliminary, as only about half of our randomized  
 309 offspring had reached one year of age at the time of this analysis.  
 310

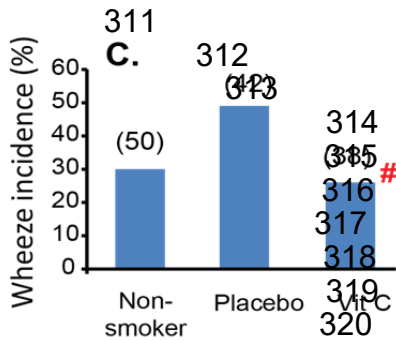

**Figure 2.** The increase in incidence of wheeze in the first year of life associated with maternal smoking was blocked by vitamin C supplementation. #  $p = .065$  comparing Vit C to placebo based on binomial regression with two randomization groups adjusting for stratification variable. Data is percent of infants in the group who have had one or more incidents of wheezing in the first year of life. Number in parentheses shows the number of infants in each group who have reached 1 year of age.

321 Smoking during pregnancy decreases available ascorbic acid to the fetus. As shown in  
 322 Figure 3 from our pilot trial, levels of plasma ascorbate in pregnant smokers were  
 323 significantly decreased compared to non smokers and 500 mg vitamin C  
 324 supplementation restored levels to normal. We have also observed similar data in  
 325

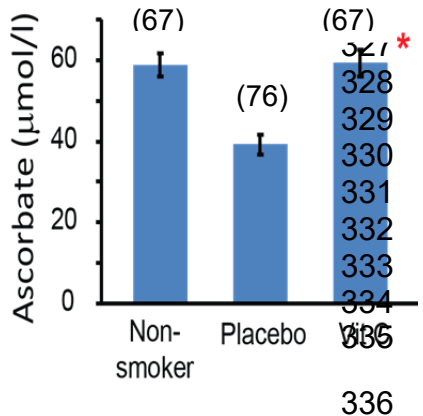

monkeys exposed to just nicotine, in which prenatal nicotine exposure also decreased ascorbate levels in both cord blood and amniotic fluid. These levels were restored by vitamin C supplementation. This data shows that the 500 mg vitamin C dose is  $\pm$  sufficient to restore vitamin C levels in the pregnant smoker to levels of the pregnant non smoker, but importantly does not significantly increase vitamin C levels over levels seen in pregnant non smokers.

337 **Figure 3.** Maternal plasma vitamin C levels (third trimester). Values are Mean  $\pm$  SEM with  
 338 sample number in parentheses. \* $p < 0.05$  for vitamin C treated group compared to placebo.  
 339

### 340 2.3 Safety of Vitamin C Therapy

#### 341 2.3.1 Maternal and Fetal/Neonatal

342 Vitamin C is a common anti-oxidant and the Institute of Medicine states that daily doses  
 343 of up to 2000 mg are likely to pose no risks of adverse effect (56). The median total  
 344 intake in a study of 2200 pregnant women (in North Carolina with 62% at  $<185\%$  of the  
 345 poverty level) was 250 mg (57).

346 Concerns over the potentially harmful effect of supplemental vitamin C during  
 347 pregnancy on prematurity have been described. A 2005 Cochrane review of vitamin C

348 supplementation in pregnancy concluded that women supplemented with vitamin C  
349 were at an increased risk of preterm birth (RR 1.38, 95% CI 1.04 to 1.82, 3 trials, 583  
350 women) (58). This meta-analysis appears unduly influenced by one of the trials (59)  
351 which was the only trial of the three to show increased preterm deliveries in the treated  
352 group. Of note, in this study 43% of the randomized patients were smokers, and there  
353 was no significant difference in the rate of prematurity within the subgroups of smokers  
354 by treatment group. A recent trial of 10,154 women randomized to vitamins C and E  
355 versus placebo did not show any significant difference in preterm births (60). Dr.  
356 McEvoy included this large recent trial (outcome data available on 9,969 patients) into a  
357 meta-analysis of existing studies totaling 10,552 patients and the RR for preterm  
358 delivery <37 weeks was 1.1, 95% CI of 0.98 to 1.11; p= 0.12 (done with Comprehensive  
359 Meta-analysis).

360  
361 Dr. McEvoy's pilot study also lends support for the safe dosing of 500 mg of vitamin C  
362 daily as there was no significant difference in maternal, fetal, or neonatal adverse  
363 outcomes between the groups of randomized smokers. In the pilot study, there were no  
364 significant differences in prematurity or gestational age between babies born to smoking  
365 mothers randomized to vitamin C versus placebo.

## 366 **2.4 Rationale for a Randomized Clinical Trial**

367 Although our pilot study showing significantly improved pulmonary function tests in  
368 newborns whose mothers received supplemental vitamin C is very encouraging, one of  
369 the key effects of maternal smoking is a decrease in infant forced expiratory flows which  
370 was not measured in the pilot project. This new randomized trial also offers us the  
371 opportunity to robustly examine clinical outcomes, specifically the incidence of  
372 wheezing, in the first year of life of infants born to randomized smokers. The  
373 measurement of forced expiratory flows is thought to be a more sensitive measure of  
374 peripheral airway function and will be measured in the current study at the two  
375 participating locations of Portland, Oregon Metropolitan area and Indianapolis, Indiana.  
376 This will reconfirm the benefit of vitamin C supplementation on pulmonary function and  
377 more precisely define its benefit on the infant's peripheral airways.

## 378 **3. Study Design**

### 379 **3.1 Primary Research Aim**

380 The primary aim of this study is to demonstrate improved pulmonary function, as  
381 measured by forced expiratory flows and specifically FEF<sub>75</sub> (forced expiratory flows at  
382 75% of FVC), in infants delivered to smoking mothers who are randomized to 500  
383 mg/day of supplemental vitamin C versus placebo during pregnancy. We hypothesize  
384 that vitamin C supplementation during pregnancy will block the adverse effects of  
385 maternal smoking on infant pulmonary function measured at 3 months of age (forced  
386 expiratory flows) in infants born to smoking mothers.

### 387 **3.2 Secondary Research Aims**

388 A secondary aim of this study is to demonstrate a decreased incidence of  
389 wheezing through 12 months of age, in infants delivered to smoking mothers who are  
390 randomized to 500 mg/day of supplemental vitamin C versus placebo during pregnancy.  
391 We hypothesize that vitamin C supplementation during pregnancy will decrease the  
392 incidence of wheezing in the first 12 months of life in offspring of smokers.  
393

394 An additional secondary aim is to demonstrate improved pulmonary function at 12  
395 months of age in infants delivered to smoking mothers who are randomized to 500  
396 mg/day of supplemental vitamin C versus placebo during pregnancy. We hypothesize  
397 that vitamin C supplementation during pregnancy will block the adverse effects of  
398 maternal smoking on infant pulmonary function measured at 12 months of age (forced  
399 expiratory flows) in infants born to smoking mothers.  
400

### 401 **3.3 Study Design Summary**

402

403 The study is a placebo-controlled, double-blind randomized trial conducted at two  
404 clinical locations: Portland, OR Metropolitan Area (clinics delivering at Oregon Health &  
405 Science University and clinics delivering at PeaceHealth Southwest Medical Center)  
406 and Indianapolis, IN (recruiting at Indiana University and Wishard Hospital). Two  
407 hundred fifty-two pregnant smokers less than or equal to 22 weeks gestation will be  
408 randomized to one of two groups:  
409

- 410 1. Vitamin C (500 mg)
- 411 2. Matching placebo

412 The Oregon Health & Science University (OHSU) research pharmacy will dispense the  
413 study medication for patients for each recruitment site. Vitamin C and placebo  
414 medications will be compounded in identical tablets at an outside site through the  
415 OHSU Research pharmacy. Each vitamin C tablet will contain 500 mg of ascorbic acid  
416 powder; the placebo tablet will contain microcrystalline cellulose and 100 mg of citric  
417 acid to mimic the taste of Vitamin C. The tablets will be otherwise identical in  
418 appearance, size and shape. The medications will be dispensed in 21 and 100 tablet  
419 quantities (21 count during the compliance period and 100 count during the treatment  
420 period). The OHSU research pharmacy will dispense the study medication for patients  
421 for each recruitment site to assure consistency.

### 422 **3.4 Eligibility Criteria**

#### 423 **3.4.1 Inclusion Criteria at Randomization**

- 424 1. Singleton gestation
- 425 2.  $\geq 15$  years old
- 426 3. Gestational age between  $13^{0/7}$  and  $22^{6/7}$  weeks based on clinical  
427 information and ultrasound as described below in “gestational age  
428 determination” (run in period can be up to 21 days).
- 429 4. Receiving prenatal care at clinics delivering at OHSU, PeaceHealth  
430 Southwest Hospital, Wishard, or Indiana University (IU) Hospital or

- 431 surrounding clinics  
 432 5. Current smoking  
 433 6. English speaking

434 **Figure 4. Study Overview**

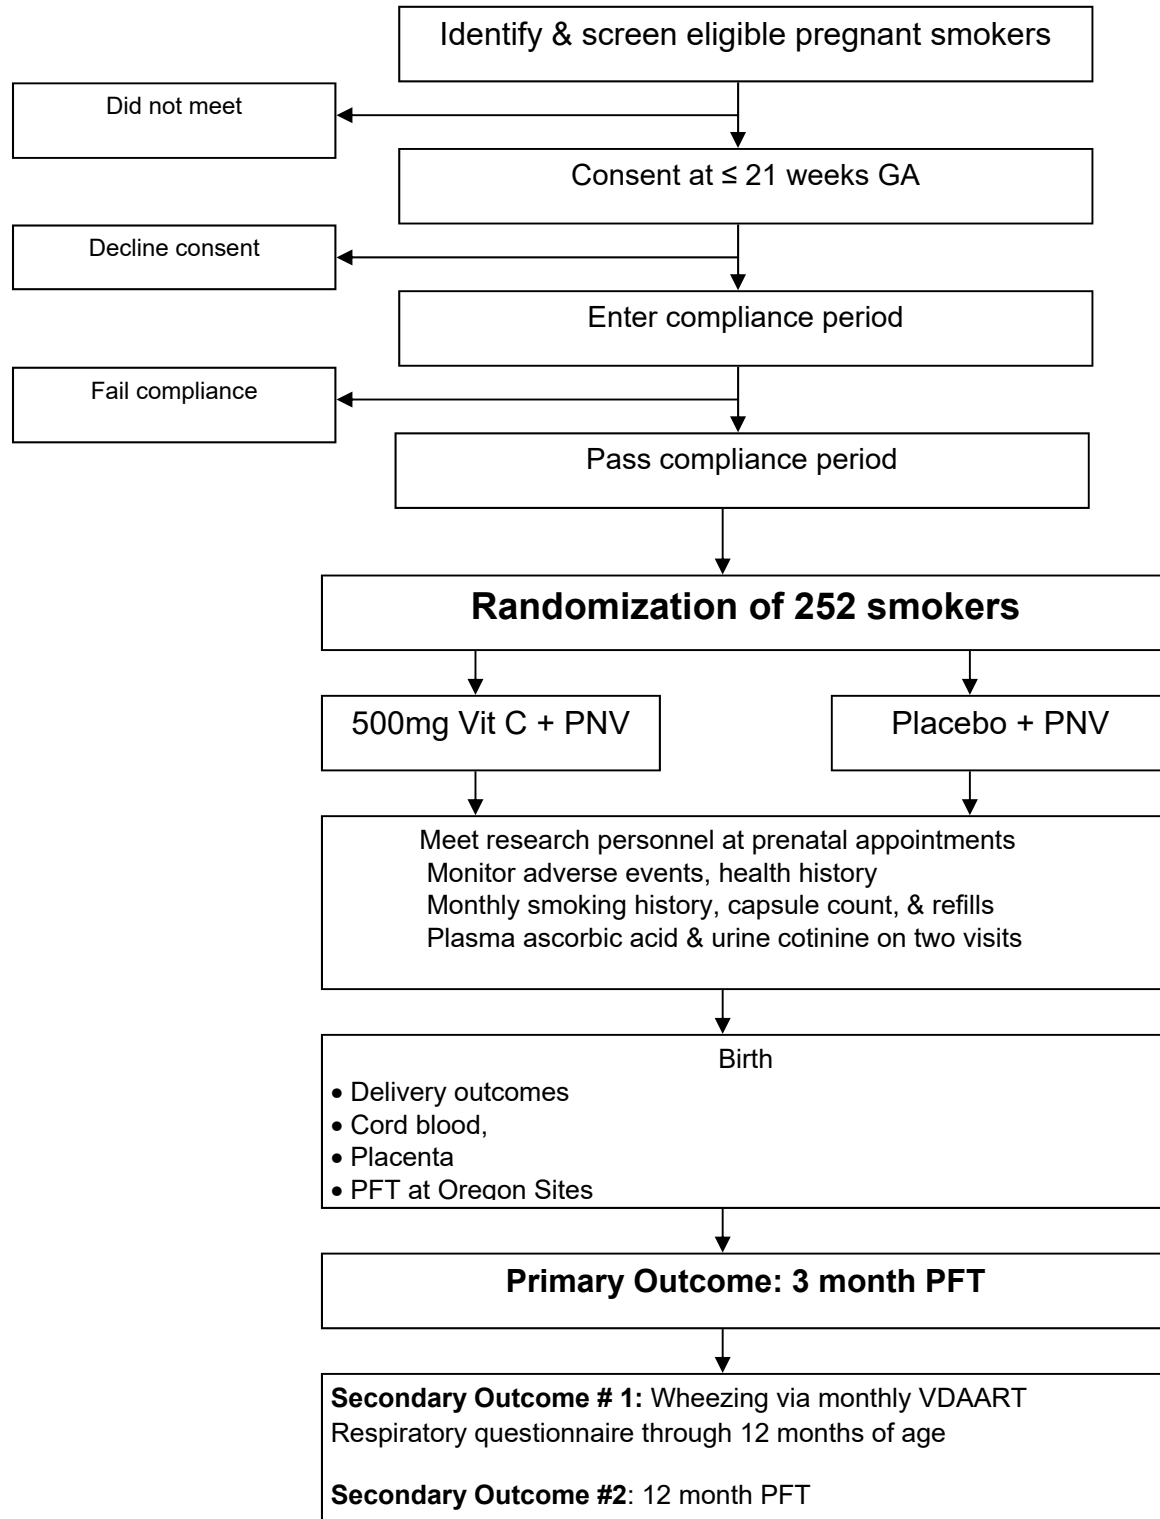

459 **3.4.1.1 Gestational Age Determination**

460 For purposes of enrollment in the run-in, gestational age will first be estimated in the  
461 pregnant woman by reviewing the results of the first available ultrasound examination.  
462 Women whose obstetrical ultrasound indicates a gestational age too advanced for the  
463 run-in (>21 weeks) will be excluded for further consideration. In cases where an  
464 ultrasound examination has not been performed, gestational age should be estimated  
465 using whatever information is available and their best judgment i.e. they may use the  
466 first day of the last menstrual period (LMP) or uterine size to assess whether gestational  
467 age is appropriate.

468  
469 All women not otherwise excluded will be interviewed for LMP and sent for an  
470 ultrasound examination, if one has not already been performed. Gestational age will be  
471 based solely on the earliest obstetrical ultrasound estimate as determined at each  
472 clinical center. Women whose gestational age at the time of randomization has been  
473 determined to be  $\leq 22$  weeks by ultrasound will be eligible to enroll in the study, pending  
474 complete review of inclusion and exclusion criteria and results of the run-in.

475  
476 **3.4.2 Exclusion Criteria at Randomization**

- 477 1. Gestational age  $\geq 23 \frac{0}{7}$  weeks  
478 2. Multiple gestation  
479 3. Documented major fetal congenital anomalies  
480 4. Current use of illicit drugs  
481 5. Current alcohol abuse as defined by questionnaire ( $\geq 3$  drinks on  $\geq 5$  days  
482 per week during this pregnancy or any hospitalization for alcohol abuse or  
483 complications of alcohol abuse or outpatient visit for acute alcohol  
484 intoxication during the past year)  
485 6. Use of vitamin C ( $\geq 500$  mg/day)  $> 3$  days per week since LMP  
486 7. Refusal to abstain from vitamin or supplements containing significant  
487 vitamin C other than those provided through the study or approved by study  
488 staff  
489 8. History of kidney stone in patient  
490 9. Insulin dependent diabetes  
491 10. Complex maternal medical conditions  
492 11. Participation in other conflicting research projects  
493 12. Unable to demonstrate stable method of communication or incarcerated  
494 13. Pregnancy by in-vitro fertilization  
495 14. Plan to terminate pregnancy  
496 15. Failure of medication compliance trial  
497 16. Failure to return in designated period during placebo run-in  
498 17. BMI  $> 50$  at screening

499  
500 **3.5 Informed Consent**

501 Written informed consent will be obtained from each subject at entry into the study.  
502 Informed consent is obtained by the following process:

- 503 1. Study will be introduced to the subject by research staff.  
504 2. Research staff will review the consent with the subject, confirm  
505 understanding, and answer any questions.  
506 3. Once understanding is confirmed, the consent is signed. Individuals  
507 authorized to obtain written consent are the principal investigator (PI), co-  
508 investigators, and assigned staff specifically designated by the PI to work  
509 on this project.  
510  
511

### 512 **3.6 Randomization Method and Masking**

513 *Randomization:* Women will be randomly allocated to vitamin C or placebo using  
514 permuted block randomization stratified by gestational age at time of randomization  
515 (less than or equal to 18 weeks versus greater than 18 weeks gestation) and clinical site  
516 (Oregon, Washington and Indiana). Stratifying by gestation and site in this way will  
517 generate approximately equal numbers of individuals in each of the two treatment  
518 groups for each combination of site and gestational age. Gestational age was selected  
519 for stratification as this is a potentially critical covariate because of the effect of duration  
520 and total dose of vitamin C on the developing infant. Weeks of gestation and study site  
521 at randomization will also be incorporated in the analysis as covariates. In setting up the  
522 blocks for randomization we will randomly choose between two block sizes in order to  
523 minimize the chance that study personnel can predict treatment assignment.  
524

525 *Blinding:* Vitamin C and placebo medications (using vitamin C powder or cellulose) will  
526 be compounded in identical tablets at an outside site through the OHSU Research  
527 Pharmacy. The cellulose will contain 100 mg of citric acid (degradable to inert products)  
528 to ensure identical organoleptic properties. A randomization schedule will be given to  
529 the research pharmacy for preparation of the medication sequence to dispense to  
530 research subjects. The study medication will be labeled with study identification and a  
531 consecutive study code for the patient, aligned with the randomization scheme.

532 After a patient has given consent, inclusion and exclusion criteria will be confirmed for  
533 each patient centrally at the DCC. She will be assigned an identification code and  
534 dispensed a three week supply of placebo to be taken as a check on compliance;  
535 subsequently, if the woman successfully completes the compliance period, she will be  
536 assigned to the next sequential allocation for the appropriate site and gestational age.  
537 Similarly, the research pharmacy will log the ID of the patient.  
538

539 As a check on the integrity of the medication preparation, potency testing of the vitamin  
540 C tablets will be done prior to the initiation of the study. As a check on the integrity of  
541 the randomization scheme, returned medication will be stored; a random 10% sample of  
542 returned medication will be assessed to ensure that the correct medication has been  
543 delivered. At the end of the study as a check on the effectiveness of blinding,  
544 participants will be asked which treatment group they believe they were assigned. The  
545 expectation is that each cohort (vitamin C versus placebo) will not be more than 50%  
546 correct in assessing their allocation. Maintaining integrity of randomization allocation

547 and blinding is the most important asset of the study and will be maintained as a  
548 primary goal of the DCC.  
549

## 550 4. Study Procedures

### 551 4.1 Identification / Screening for Eligibility

552 Recruitment will be maximized by assigning a specific research coordinator in Portland  
553 and in Indiana to screen and consent eligible patients. Pregnant women will be recruited  
554 by referrals from providers and by self-referral via advertisements. Research staff will  
555 query the hospitals' electronic medical records to identify obstetrical patients who fit  
556 initial eligibility criteria. All obstetrical questionnaires inquire about smoking status. If the  
557 response is positive and the patient agrees, the patients will be referred to study  
558 research staff who will be available at the patient's next routine prenatal appointment.  
559 The providers at each of these clinics have approved this approach.  
560

### 561 4.2 Baseline Procedures/ Counseling and Enrollment

562 At the prenatal visit, the patient will be approached about the study and once again  
563 smoking cessation will be encouraged. At a minimum, the **5 A's** for smoking  
564 intervention will be assessed: **Ask** about tobacco use; **Advise** every smoking patient to  
565 quit; **Assess** willingness to make a quit attempt; **Assist** in quit attempt; **Arrange** for  
566 follow-up, future support(61). Pregnancy-specific smoking cessation pamphlets will be  
567 given. We will strongly encourage the patient to participate in a smoking cessation  
568 program, therefore this population will actually receive greater encouragement to quit  
569 smoking than the general population. Only women truly unable to quit smoking will be  
570 involved in the study. The research team will be certified in smoking cessation training.  
571 Dr. Gonzales of the OHSU Smoking Cessation Center is a co-investigator on the study  
572 (62, 63) and advises the research teams about cessation techniques. Study personnel  
573 will document that cessation counseling was offered. A substantial proportion of  
574 pregnant smokers will stop spontaneously before they begin prenatal care and those  
575 who are active smokers at their first prenatal visit are less likely to change their smoking  
576 habits (64-66). Upon randomization, a detailed smoking questionnaire geared towards  
577 pregnancy (61) will be administered. Smoking cessation counseling will continue  
578 throughout the study. **Participation in this study does not give the pregnant  
579 smoking woman license to continue smoking, as smoking cessation and  
580 education of the negative effects of smoking on the newborn are done at each  
581 prenatal visit. In our pilot study we had an additional cessation rate of 10% in our  
582 patients and their families.** If a patient quits smoking after randomization, this will be  
583 noted and they will be instructed to continue to take the study medication.  
584

585 To exclude highly noncompliant subjects, consented patients will enter a medication  
586 compliance trial of  $14 \pm 7$  days. The compliance medication is dispensed by research  
587 pharmacy and is a tablet filled with cellulose that is slightly acidic. This is the same  
588 tablet that the patient will receive if randomized to the placebo arm of the study. Patients

589 will be excluded if they fail to return for a post compliance visit within  $14 \pm 7$  days of the  
590 screening visit or if they took  $< 75\%$  of the required tablets.

591  
592 The second study visit will include assessment of the compliance trial. If the patient is  
593 compliant ( $\geq 75\%$  tablets consumed and returns within  $14 \pm 7$  days of first screening  
594 visit) the detailed smoking questionnaire will be administered, blood, urine, and hair  
595 samples will be collected, an exhaled carbon monoxide test will be done, and the  
596 patient will be randomized into the study. Body weight, body mass index, and blood  
597 pressure will be recorded from the patient's chart.

598  
599 The following table includes all information collected during the visits prior to and at  
600 randomization.

601

602 **Table 2. Summary of Screening and Baseline Procedures**

603

| Screening Visit 1               | Run –In / Randomization     |
|---------------------------------|-----------------------------|
| Health & medical history        | Evaluate compliance trial   |
| Smoking questionnaire           | Smoking questionnaire       |
| Demographic/contact information | Hair sample for nicotine    |
| Informed consent                | Plasma vitamin C (fasting)  |
| Distribute compliance drug      | Urine cotinine              |
| Pre-pregnancy weight            | Exhaled carbon monoxide     |
| Height, weight, blood pressure  | Distribute study drug       |
|                                 | Distribute prenatal vitamin |
|                                 | Health history change       |
|                                 | Weight, blood pressure      |
|                                 | Reimbursement check         |

604

605 **4.3 Patient Management and Follow-up**

606 Interval study visits will be coordinated with routine prenatal visits by the research  
607 assistant assigned to each specific study site. Frequent, consistent, and personal  
608 contact is critical to retain this vulnerable population in a research protocol. Interval  
609 phone calls or text messages or Emails to patients will be done approximately monthly,  
610 and investigators will request multiple contact phone numbers and addresses (including  
611 those of relatives and friends), methods to contact patient confidentially through the  
612 social media, and have small travel reimbursements to maximize the retention of the  
613 study cohort. Patients will receive standard prenatal care as defined by their institution.  
614 Patients will be instructed to take one study tablet and one prenatal vitamin (provided by  
615 the study containing the minimum daily requirement for vitamin C) daily, preferably with  
616 meals, and to bring medication bottles to each study visit.

617

618 **4.4 Prenatal Study Visit Procedures**



619 Study patients will be seen every four weeks at standard prenatal visits through  
620 delivery. At each post-randomization study visit, the following procedures will be  
621 performed:

- 622 • Interval smoking questionnaire
- 623 • Pill counts
- 624 • Assess adverse events
- 625 • Assess open label use
- 626 • Changes in health & medical history
- 627 • Review of contact information, documentation of changes in work or home  
628 status, and best times and method of contact
- 629 • Document clinic measurement of weight and blood pressure

630  
631 At baseline,  $26 \pm 2$ , and  $32 \pm 2$  weeks, urine and fasting blood will be collected for  
632 cotinine, oxidant, anti-oxidant status, and compliance testing. Any extra urine or blood  
633 may be stored for future use. An exhaled carbon monoxide level will also be done.  
634

#### 635 **4.4.1 Administration of Validated Smoking and Respiratory Questionnaire**

##### 636 **4.4.1.1 Maternal Questionnaire**

637 Maternal smoking and respiratory history will be documented through the administration  
638 of a modified validated respiratory questionnaire published by the American Thoracic  
639 Society (67).

##### 640 **4.4.2 Urine Cotinine Testing**

642 Urine samples will be collected for assessment of cotinine and other biomarkers such  
643 as 8-isoprostanes at study visits at baseline,  $26 \pm 2$ , and  $32 \pm 2$  weeks of gestation.  
644 Cotinine analysis (68) will be performed by HPLC-mass spectrometry in Eliot Spindel's  
645 laboratory.

##### 646 **4.4.3 Plasma Ascorbic acid / Vitamin C Testing**

648 Fasting ascorbic acid (about 1.5 mL of blood) will be done at baseline,  $26 \pm 2$ , and  $32 \pm$   
649  $2$  weeks of gestation. Plasma ascorbic acid measurements will be performed using  
650 HPLC with coulometric electrochemical detection by Dr. Balz Frei's (69) laboratory at  
651 the Linus Pauling Institute, Oregon State University.

##### 652 **4.4.4 Hair Nicotine Testing**

654 Small samples of the mother's hair will be taken at baseline and near delivery for the  
655 assessment of hair nicotine. In addition, mother and infant hair will be collected at 3  
656 and 12 months of age for the same analysis. Hair nicotine will be determined by a  
657 modification of the methods of Hegstad et al (70) by tandem mass spectrometry (LC-  
658 MS/MS) using deuterated internal standards.  
659

660 **4.4.5 Carbon Monoxide Measurement**

661 Non-invasive measurements of carbon monoxide (CO) will be performed by mother at  
662 baseline,  $26 \pm 2$ , and  $32 \pm 2$  weeks of gestation, and at 3 and 12 month PFT  
663 (Smokerlyzer, Bedfont Scientific, London, UK) (71).

664  
665 **4.4.6 Study Medication Compliance**

666 At each study visit the patient will bring her study medication bottle. Pills will be counted  
667 and compliance assessed. Enrolled patients will be asked to return all unused tablets at  
668 every study visit and when hospitalized for delivery, and also will receive interval phone  
669 calls regarding medication intake. Compliance will be computed by dividing the number  
670 of tablets taken by the total number of prescribed tablets and will be recorded in the  
671 study database.

672  
673 Samples for plasma ascorbic acid will be collected prior to randomization, at  $26 \pm 2$ , and  
674  $32 \pm 2$  weeks of gestation, and from the umbilical cord at delivery for analysis of vitamin  
675 C as a measure of compliance. Near the time of delivery, women are customarily not  
676 allowed to eat, and study personnel will request that they do not drink any liquid high in  
677 vitamin C in the hours prior to delivery.

678  
679 **4.4.7 Side Effects**

680 Patients will be assessed for potential medication side effects at each study visit.

681  
682 **4.4.8 Measurement of Placental Blood Flow**

683 Preliminary data in nonhuman primates has recently demonstrated decreased placental  
684 blood flow in nicotine-exposed fetal monkeys and has demonstrated that supplemental  
685 vitamin C blocks this effect. Based on this data, extra ultrasound views will be done  
686 pending funding, timed as often as possible during a routinely ordered prenatal  
687 ultrasound to specifically measure umbilical blood flow using color and pulsed/wave  
688 Doppler, uterine artery and placental volume blood flow (72). These extra views will be  
689 done at  $34 \pm 2$  weeks of gestation. . Extra ultrasound views done specifically for the  
690 vitamin C study will be paid for at the established research rate and will not be charged  
691 to the patient. Patients in the Pacific Northwest will be given the option of having testing  
692 done at OHSU or Peace Health/ Southwest to offer greater scheduling options.

693 **4.4.9 Genotyping**

694 If the mother consents, she and her infant will be genotyped for the  $\alpha 5$  nAChR structural  
695 polymorphism (rs16969968), the null alleles for GSTM1 and GSTT1 and the decrease  
696 of function allele for GSTP1, and remaining DNA will be stored for further genetic  
697 analyses of smoking-induced changes. Blood will be collected in 3 mL EDTA tubes and  
698 stored at  $-80^{\circ}$  C. Genomic DNA will be isolated from 0.35 mL of blood using the  
699 Machery-Nagel nucleospin-8 kit. Polymorphisms will be determined by quantitative PCR  
700 (qPCR). Maternal blood for genotyping will be collected at the same time as another  
701 blood draw. Infant blood for genotyping will be collected from the umbilical cord or at the

702 3 or 12 month PFT. In addition, buccal swabs will be taken from mothers and offspring  
703 at birth, 3 months of age, 12 months of age (73). Buccal swabs will be taken using  
704 Epicentre Catch-All soft foam swabs which are suitable for use with infants. Swabs are  
705 sterile and individually wrapped with collection tubes. Swabs are performed by  
706 removing the swab from its packaging, then rolling the Epicentre Catch-All sample  
707 collection swab on the inside of the cheek, approximately 10-20 times on each side,  
708 making certain to roll the brush over the entire cheek. After collection the swab is air  
709 dried for 10-15 minutes at room temperature then the swab is placed back in the  
710 collection tube and stored at -20°C. To increase yield of cells a separate swab may be  
711 used for each cheek surface. For older subjects, the mouth should be rinsed with water  
712 prior to beginning sample collection. These genetic analyses will be done under a  
713 separate consent

714

## 715 **4.5 Procedures at Labor and Delivery**

716 Identification of a study patient upon admission for delivery will be done via an  
717 automated flagging of the patient's electronic medical record (EMR), when possible, to  
718 alert on call research personnel. Patients will also be encouraged to call or text research  
719 personnel on the way to delivery. Umbilical cord blood and placenta samples will be  
720 collected.

721

### 722 **4.5.1 Maternal Data Collection at Delivery**

723 Careful attention will be made to record mother's timing of last study medication intake  
724 as well as dietary intake (requesting if possible no juices with vitamin C) prior to delivery  
725 as this will affect the ascorbic acid level from the umbilical cord sample. At delivery, a  
726 sample of the cord blood will be collected for ascorbic acid levels and genotyping.  
727 Placenta samples will be obtained and will be banked pending further funding using  
728 standard procedures. Maternal hospital records will be reviewed by research staff and  
729 contact information including that of family members reviewed.

730

### 731 **4.5.2 Neonatal Data Collection at Delivery**

732

733 As above, umbilical cord blood will be collected at delivery for ascorbic acid levels and  
734 genotyping. Infant hospital records through discharge will be reviewed by research staff  
735 and birth weight, length and head circumference will be obtained. At OHSU and SWW  
736 pending further funding, a pulmonary function test will be done after delivery. This test  
737 will include the measurement of flow volume loops, passive respiratory compliance and  
738 functional residual capacity ( 74-76). No sedation will be required. When possible a  
739 small sample of baby hair will be gently collected for nicotine analysis.

740

## 741 **4.6 Infant Follow-Up and Procedures**

### 742 **4.6.1 Infant Respiratory Questionnaire**

743 After delivery, a validated respiratory questionnaire (77-79) will be administered at least  
744 quarterly to the infant's primary caregiver to compare the incidence of wheezing (80)  
745 between the infants of smoking mothers randomized to vitamin C and placebo. This is  
746 the format and questionnaire used in the ongoing Vitamin D Antenatal Asthma  
747 Reduction Trial (VDAART) study. No education or training will be given to the infant's  
748 primary care taker with regards to the recognition of wheeze so that the results will be  
749 generalizable to previously published studies. This is the same approach that the  
750 VDAART trial is using. Caregivers are asked about new episodes of wheezing since the  
751 last questionnaire , as well as administration of prescribed medications, other illnesses,  
752 trips to the emergency room, and hospitalizations. If an infant has wheezing associated  
753 with an illness lasting up to seven days, this will be counted as one episode. These  
754 questionnaires will be administered in person at the 3 and 12 month PFT visits (see  
755 below) while the remainder of the monthly questionnaires will be administered by  
756 phone. A small time reimbursement will be available for those patients after each  
757 questionnaire is completed.  
758  
759

#### 760 **4.6.2 Infant Pulmonary Function Tests With Sedation**

761 Infant pulmonary function testing will be performed at 3 months (range of 12 - 18 weeks  
762 of post term age) and 12 months (range of 10-14 months of age). No testing will be  
763 done within 3 weeks of a respiratory illness; every attempt will be made to obtain testing  
764 within this timeframe. A test may be repeated if the quality was not acceptable. This  
765 testing will include the measurement of forced expiratory flows following the guidelines  
766 of the American Thoracic Society and European Respiratory Society which were co-  
767 written by Dr. Tepper (81-82). The pulmonary function testing equipment and  
768 operational procedures will be rigorously calibrated across study sites according to the  
769 manufacturer's directions and outlined explicitly in the operations manual. The  
770 respective hospital pediatric sedation protocol will be followed for the three and 12  
771 month PFT using oral chloral hydrate (82). The infant will be given 50 to 100 milligrams  
772 per kilogram of chloral hydrate by mouth, with a maximum dose of 1 gram. The parents  
773 will be counseled about possible side effects including amnesia, confusion,  
774 hyperactivity, nausea, respiratory depression, and hypotension and will be asked to sign  
775 a separate consent for sedation, and also be given the patient education-discharge  
776 instructions. Adverse events will be reported as outlined below. The parents will also be  
777 told whether the results of the 3 and 12 month pulmonary function test were within  
778 normal limits or outside of normal limits, and this report will be faxed to the patient's  
779 physician.  
780

#### 781 **4.7 Adverse Event Reporting**

##### 782 **4.7.1 Adverse Event Collection, Review, and Grading**

783 Adverse events (AEs) in this study will be identified by interviewing the subject, review  
784 of the subject's electronic medical record (EMR), and by physical exam / observations  
785 (including vital signs monitoring during sedation). AEs will be graded as to their

786 expectedness and attribution (unrelated, possibly, probably or definitely related to the  
787 protocol). AE's will be reviewed in real-time by the physicians at each location.

788  
789

#### 790 **4.7.2 Definitions**

#### 791 **Definitions**

792 Adverse Event (AE): Any untoward or undesirable, although not necessarily  
793 unexpected, event experienced by a human subject that may be a result of:

- 794 • The interventions and interactions use in the research
- 795 • The collection of identifiable private information in the research
- 796 • An underlying disease, disorder, or condition of the subject
- 797 • Other circumstances unrelated to the research or any underlying disease,  
798 disorder, or condition of the subject

799

800 Serious Adverse Event (SAE): Any AE that:

801

- 802 • Is fatal
- 803 • Is life-threatening
- 804 • Is persistent or significantly disabling or incapacitating
- 805 • Results in inpatient hospitalization or prolongation of hospitalization
- 806 • Results in psychological or emotional harm requiring treatment
- 807 • Creates a persistent or significant disability
- 808 • Causes a congenital anomaly or birth defect
- 809 • Results in a significant medical incident (considered to be a serious study related  
810 event because, based upon appropriate medical judgment, it may jeopardize the  
811 subject and may require medical or surgical intervention to prevent one of the  
812 outcomes listed in this definition)

813

814 Unanticipated problems (UP): Events that are not expected given the nature of the  
815 research procedures and the subject population being studied and suggest that the  
816 research places subjects or others at a greater risk of harm or discomfort related to the  
817 research than was previously known or recognized. Harm to a subject need not occur  
818 for an event to be an unanticipated problem.

819

820

#### 821 **4.7.3 Reporting of Adverse Events**

822 All AEs, SAEs, and UPs should be documented on the appropriate adverse event  
823 logs/forms, entered into the REDCap database, and reported to the DCC as outlined  
824 below.

- 825       • All SAEs and UPs should be reported by the clinical site to the DCC within 1  
826       business day.  
827       • All other AEs should be entered into REDCap within 7 days.

828       The DCC will evaluate each event and will determine reporting requirements. The DCC  
829       will report events to the DSMB according to the following timeframes:

- 830       • All SAEs and UPs that require expedited reporting (SAEs that are deemed  
831       related and unexpected, all UPs) will be reported to the DSMB within 7 business  
832       days of the time the PI learns of the event.  
833       • All other SAEs will be reported within 30 business days of the time the PI learns  
834       of the event.  
835       • All other AEs will be reported to the DSMB quarterly.

836       Additionally, the following events will also require expedited reporting:

- 837       a. Maternal death through delivery  
838       b. Fetal loss, neonatal or infant death through 1 year of age  
839       c. Any sedation related event requiring significant resuscitation and/or  
840       hospitalization

841  
842       **4.7.3.2       Periodic Summary Reporting**

843       All other AE's (that did not require expedited reporting as above) will be summarized  
844       quarterly for the DSMB. Summary AE and SAE reports will also be submitted to the  
845       IRB at least annually.

846  
847       **4.7.3.3       Expected Risks**

848       As detailed in the consent form, expected risks during the course of the study may  
849       include:

- 850       • Possible stomach upset with medications  
851       • Restlessness during PFTs  
852       • Pain during blood draws  
853       • Embarrassing questions  
854       • Sedation may include coughing, nausea, mild desaturations, obstruction of  
855       airway, apnea  
856       • Breach of confidentiality

857  
858       These risks are considered moderate and are addressed in the consent form.

859       The following are expected to require termination of study medication:

- 860       • Side effect presumed to be from study medication

- 861 • Termination of pregnancy
- 862 • Urolithiasis
- 863 • Serious complication of pregnancy where continuation of study medication is
- 864 deemed inappropriate or impossible

865

#### 866 **4.8 Study Outcome Measures**

##### 867 **4.8.1 Primary Outcome: Pulmonary Function Testing at Three Months**

868 The primary outcome of this study is the measurement of infant pulmonary function  
869 tests (PFT)s, specifically, the measurement of forced expiratory flow at 75% of the  
870 expired volume (FEF<sub>75</sub>) using the raised volume rapid thoracic compression RVRTC  
871 technique. Forced expiratory flow measurements are the parameters of airway function  
872 shown to be most sensitive to the effects of maternal smoking in infants and most  
873 predictive of increased risk of future pulmonary disease (14,21,22). Forced expiratory  
874 flows cannot be routinely performed in the immediate newborn period due to the  
875 instability of the newborn's lung volumes in the first weeks of life, sedation needs, and  
876 separation from the family. Thus, PFTs will be performed at three months of age to  
877 minimize cohort loss and exposure to passive smoke, while minimizing any possible  
878 side effects from the required chloral hydrate sedation (84-86). Since mothers who  
879 smoked during pregnancy are very likely to continue after pregnancy and live with other  
880 smokers, these details will be carefully recorded in the at least quarterly questionnaires,  
881 though postnatal smoke exposure has relatively little effect on forced expiratory flows.  
882 Hair nicotine (87, 88) level is a valid and reliable measure of longer term tobacco  
883 exposure and an infant and maternal hair sample will be collected at the 3 and 12  
884 month pulmonary function test to document postnatal exposure.

885

886 All pulmonary function tests will be performed in the controlled infant pulmonary function  
887 testing laboratory located at OHSU/Doernbecher Children's Hospital (PFT laboratory in  
888 existence since 2000), the James Whitcomb Riley Hospital for Children (PFT laboratory  
889 in existence since 1983), or the PFT laboratory at Peace Health/ Southwest Medical  
890 Center (existence since 2005). Patients in the Pacific Northwest will be given the option  
891 of having testing done at OHSU or Peace Health/ Southwest to offer greater scheduling  
892 options. These laboratories are the few across the country equipped to perform this  
893 testing in infants and have a history of successful studies in the area of infant pulmonary  
894 function testing. All labs are staffed with skilled technicians who will be performing the  
895 pulmonary function tests under physician supervision (Diane Schilling, RRT, Christina  
896 Jo Tiller, RRT, Keith Jackson, RRT) and skilled personnel, nurses or physicians  
897 performing sedation. Since growth/length is an important determinant of the forced  
898 expiratory flows (FEF)s, the pulmonary function test will be performed as close as  
899 possible to 12 weeks of corrected age. However, since testing cannot be done within 3  
900 weeks of a respiratory illness, we will allow the upper limit of testing to be 18 weeks of  
901 age to minimize cohort loss. Testing will be performed following the American Thoracic  
902 Society/ European Respiratory Society criteria for performance and acceptance (81) co-  
903 written by Dr. Tepper and measurements reported as absolute values as well as  
904 corresponding z scores (82).

905  
906  
907  
908  
909  
910  
911  
912  
913  
914  
915  
916  
917  
918  
919  
920  
921  
922  
923  
924  
925  
926  
927  
928  
929  
930  
931  
932  
933  
934  
935  
936  
937  
938  
939  
940  
941  
942  
943  
944  
945  
946  
947  
948  
949  
950

#### **4.8.2 Secondary Outcome # 1: Incidence of Wheezing through 12 months**

A standardized infant respiratory questionnaire (77-79) will be administered at least quarterly by phone and at the 3 and 12 month in-person visits when the PFTs are performed. This detailed questionnaire documents the incidence and prevalence of wheezing in infants through one year of age as well as a number of other respiratory symptoms and medications of interest. This will be administered to the infant's primary caretaker. Multiple phone numbers, preferred mode of communication and day and time of communication will also be noted to maximize the successful completion of these questionnaires. Incremental time reimbursement will be given to the mother for successful completion of the study through 12 months of age.

#### **4.8.3 Secondary Outcome # 2: Pulmonary Function Testing at 12 months**

Infant pulmonary function testing at  $12 \pm 2$  months of age (but not within 3 weeks of a respiratory illness) will be performed as outlined above in the primary outcome PFT at 3 months of age. In addition, correlation with clinical symptoms of wheezing and with PFT at 3 months of age will be performed.

#### **4.8.4 Other Fetal and Neonatal Outcomes**

1. Fetal and neonatal death
2. Gestational age at delivery
3. Incidence of prematurity < 37 weeks and < 32 weeks of gestation
4. Mode of delivery
5. Birth weight, birth length, and head circumference.
6. Small for gestational age as measured by birth weight: a) <3<sup>rd</sup> percentile and b) < 10<sup>th</sup> percentile for gestational age, assessed specifically by sex and race of the infant and expressed in appropriate z scores
7. Apgar score at 1 and 5 minutes
8. Admission to neonatal intensive care Unit (NICU) and hospital days
9. Respiratory distress syndrome (RDS): requires oxygen or respiratory support (including continuous positive airway pressure) for  $\geq 6$  of the first 24 hours of life and has consistent clinical features with premature lung disease
10. Intraventricular hemorrhage (IVH)
11. Retinopathy of prematurity (ROP)
12. Necrotizing enterocolitis (NEC)
13. Bronchopulmonary dysplasia (BPD)
14. Patent ductous arteriosus (PDA)
15. Sepsis defined as a positive blood, urine, or cerebrospinal fluid culture
16. Placental weight, dimensions, appearance, and histology
17. Growth as documented by research staff at 3 and 12 month PFT procedures including weight, height (length) and head circumference.
18. Incidence of Sudden Infant Death Syndrome
19. Duration of breast feeding



951 **4.8.5 Other Maternal/Pregnancy Outcomes**

- 952 1. Clinical diagnosis of preeclampsia or eclampsia  
953 2. Placental abruption  
954 3. Placenta previa  
955 4. Stillbirth  
956 5. Gestational diabetes  
957 6. Premature rupture of the membranes (PROM) and preterm ROM  
958 7. Clinical diagnosis of pregnancy associated Gestational hypertension:  
959 Defined as mild or severe pregnancy-associated hypertension in the  
960 absence of proteinuria or other diagnostic criteria qualifying for  
961 preeclampsia, as defined above  
962 8. HELLP Syndrome: Defined as pregnancy-associated hypertension (mild or  
963 severe) with both of the following:  
964 a. Thrombocytopenia: platelet count < 100,000/ mm<sup>3</sup>  
965 b. SGOT (AST) ≥ 100 U/L  
966 9. Days of maternal hospitalization  
967  
968

**5. Statistical Considerations**

969 **5.1 Sample Size and Power Considerations**

970 We hypothesize that infants of pregnant smokers randomly allocated to vitamin C  
971 versus placebo will show significant increases in PFTs, specifically FEF<sub>75</sub> measured at 3  
972 months of age, using the raised volume rapid thoracic compression technique (RVRTC).  
973 Data from our pilot study indicate that as compared to placebo, vitamin C prevents  
974 some of the maternal smoking-induced changes in pulmonary function in the offspring,  
975 particularly in the time to peak tidal expiratory flow to expiratory time (TPTEF:TE). This  
976 will be tested by more sensitive measures in this proposed study.

977 We have obtained our estimates of sample size and power using our experience in the  
978 pilot study and on measures of variability as published by Dr. Tepper, a co-investigator  
979 of proposed study. For the primary outcome, FEF<sub>75</sub>, we use Tepper's reference data  
980 (82) for estimating needed sample sizes with the RVRTC technique; forced expiratory  
981 flows were measured in 155 healthy infants born to both nonsmoking and to smoking  
982 women. The estimated standard deviation from a regression model comparing infants of  
983 non-smoking to smoking women was 0.28, using the natural logarithm of FEF<sub>75</sub> as the  
984 outcome. The estimated increase in FEF<sub>75</sub> for infants of nonsmoking women was 17.6%  
985 greater than that for infants born to smoking women. For power calculations, we use  
986 this value along with increases of 15.0% and 12.5%.

987 **Consideration of Effect Size.** Our pilot PFT data show a significant difference of 11%  
988 (p<0.01) in TPTEF:TE and a difference in respiratory compliance (Cr<sub>s</sub>) between babies  
989 born to smoking pregnant women randomized to vitamin C versus placebo. Both are  
990 clinically significant, particularly the change in TPTEF:TE, for a number of reasons: 1)  
991 several studies have shown this flow ratio to be decreased in babies delivered to  
992 smoking versus nonsmoking pregnant women (12, 21, 23, 24); 2) a longitudinal study

993 (23) has shown that a decrease of 8% in this flow ratio of TPTEF:TE measured at birth  
 994 was associated with an increased risk of asthma (24.3% vs 16.2%, p=0.01; OR, 1.58);  
 995 or current asthma (14.6% vs 7.5%, p=0.005; OR, 2.10) at 10 years of age. However, this  
 996 ratio is complex because it reflects the degree to which expiratory flow and timing are  
 997 modulated to slow lung emptying during expiration. It may be affected by neural  
 998 alterations in the control of breathing (which could also be affected by smoking in  
 999 pregnancy) as well as changes in respiratory mechanics. Based on Spindel's nicotine  
 1000 exposed primate data (6) which show decreased collagen deposition after vitamin C  
 1001 supplementation and our pilot data which demonstrate decreased wheezing, we believe  
 1002 that the changes we have shown in TPTEF:TE are likely due to changes in respiratory  
 1003 mechanics/airway function. The measurement of forced expiratory flows will more  
 1004 precisely define the beneficial effect of the vitamin C on peripheral airway function.

1005 Hoo reported both forced expiratory flows and TPTEF:TE to be decreased in infants  
 1006 delivered to smoking mothers (12), but there is no data to directly translate changes in  
 1007 TPTEF:TE into expected changes in FEF<sub>75</sub>. Measurements of TPTEF:TE tend to have  
 1008 increased variability than FEF<sub>75</sub> due to patient state and spontaneous breathing. We  
 1009 now propose to use RVRTC, a more sensitive pulmonary function technique for  
 1010 measuring the peripheral airway function in infants. The measurements of FEFs with the  
 1011 RVRTC are more reproducible with decreased variability as the patient is sedated and  
 1012 the flows are measured repetitively from the same known lung volume. With this in  
 1013 mind, we powered our study to show a 15% difference in FEFs between randomized  
 1014 patients. We chose this as clinically significant since the NHLBI asthma guidelines (89)  
 1015 defines a positive response to a bronchodilator as an increase in FEV1 ≥ 12%.  
 1016 Below are sample sizes needed for 80% and 90% power at significance level 0.05 using  
 1017 the estimated standard deviation from Jones et al.(82) as well as a 90% upper  
 1018 confidence bound for the standard deviation, 0.30 using the chi-squared distribution of  
 1019 the estimated SD. Calculations are based on two-sided tests.

1020 **Table 3.** Sample sizes per group for FEF<sub>75</sub> with 90 (80%) power using a two-sided test  
 1021 at level 0.05.

| Mean difference in ln(FEF <sub>75</sub> ) between infants in the vitamin C and the placebo groups. | Ratio of FEF <sub>75</sub> for infants in mothers allocated to vitamin C relative to placebo. | Sample size per group needed for 90% (80%) power using the estimated SD of 0.28. | Sample size per group for 90% (80%) power using estimated 90% upper confidence bound for SD (0.30). | Sample size per group for 90% (80%) power using estimated 90% upper confidence bound for SD: 0.30 and assuming 4% non-adherence/crossover |
|----------------------------------------------------------------------------------------------------|-----------------------------------------------------------------------------------------------|----------------------------------------------------------------------------------|-----------------------------------------------------------------------------------------------------|-------------------------------------------------------------------------------------------------------------------------------------------|
| 0.162                                                                                              | 17.6%                                                                                         | 64 (48)                                                                          | 75 (56)                                                                                             | 82 (61)                                                                                                                                   |
| 0.1398                                                                                             | 15.0%                                                                                         | 86 (64)                                                                          | <b>100</b> (75)                                                                                     | <b>109</b> (82)                                                                                                                           |
| 0.1178                                                                                             | 12.5%                                                                                         | 120 (90)                                                                         | 140 (105)                                                                                           | 152 (114)                                                                                                                                 |

1022  
 1023

102 **Figure 5.** Original Projected Study  
 102 Recruitment with Projected Cohort Losses  
 102 Based on Pilot Data

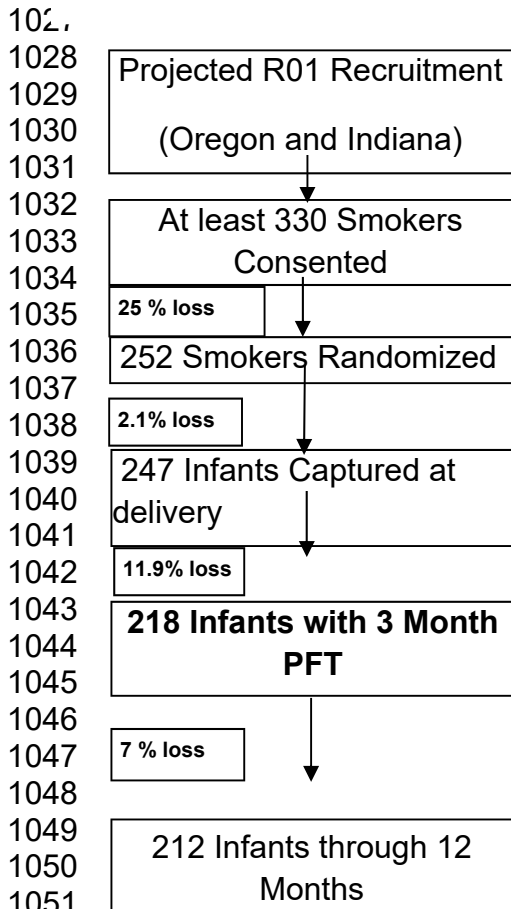

Conservatively, using the 90% upper confidence bound for the standard deviation, with a sample size of 100 mothers per group, we would have 90% power at level 0.05 to detect an increase of 15% in FEF<sub>75</sub> for infants randomized to Vitamin C compared to those randomized to placebo and measured at 3 months of age. Adherence data from the pilot study demonstrates that only 4% of the patients were non-compliant as defined as taking < 50% of their medications. **Adjusting for this non-adherence, we increased our sample size to 109 patients per group studied at the 3 month PFT.** Figure 5 shows the original projected study recruitment to achieve desired sample size based on recruitment and cohort loss data from pilot study.

1053 With regard to secondary outcome #1 aim 2, our data from the pilot study on 80 infants  
 1054 from mothers allocated to vitamin C versus placebo have suggested a difference in  
 1055 episodes of wheezing in their infants at 1 year of age: placebo 48%, vitamin C 26%  
 1056 (p=0.06). The incidence in infants of the placebo group is similar to that reported by  
 1057 Dezateux (22) (45%), in 101 infants of mothers who smoked in pregnancy evaluated at  
 1058 1 year. The incidence in infants of non-smoking mothers was 14%. Based on the pilot  
 1059 study results and those in Dezateux (22), Table 3 shows the sample sizes needed to  
 1060 detect various hazard ratios with 80% and 90% power with a two-sided significance  
 1061 level of 0.05. Calculations are based on the log-rank test.

1062  
 1063  
 1064  
 1065  
 1066  
 1067  
 1068  
 1069

1070  
1071  
1072  
1073

**Table 4.** Sample sizes per group to detect wheezing incidence with 90% (80%) power

| Proportion wheeze in placebo group within first year | Proportion wheeze in vitamin C group within first year | Hazard Ratio vitamin C group relative to placebo | Sample size per group <b>needed at delivery</b> for 90% (80%) power with drop-out of 0.5% per month | Sample size per group <b>needed at delivery</b> for 90% (80%) power with drop-out of 1% per month |
|------------------------------------------------------|--------------------------------------------------------|--------------------------------------------------|-----------------------------------------------------------------------------------------------------|---------------------------------------------------------------------------------------------------|
| 0.48                                                 | 0.14                                                   | 0.23                                             | 35 (27)                                                                                             | 36 (28)                                                                                           |
| 0.48                                                 | 0.20                                                   | 0.34                                             | 57(43)                                                                                              | 59 (45)                                                                                           |
| 0.48                                                 | 0.26                                                   | 0.46                                             | 99 (74)                                                                                             | 101 (77)                                                                                          |
| 0.45                                                 | 0.14                                                   | 0.25                                             | 41 (32)                                                                                             | 42 (33)                                                                                           |
| 0.45                                                 | 0.20                                                   | 0.37                                             | 71 (54)                                                                                             | 73 (55)                                                                                           |
| 0.45                                                 | 0.26                                                   | 0.50                                             | 131 (99)                                                                                            | 135 (102)                                                                                         |
| 0.40                                                 | 0.14                                                   | 0.30                                             | 54 (44)                                                                                             | 58 (45)                                                                                           |
| 0.40                                                 | 0.20                                                   | 0.44                                             | 108 (81)                                                                                            | 111 (84)                                                                                          |

1074 Our targeted sample size of 113 per group at delivery (109 per group obtaining  
1075 successful FEF<sub>75</sub> measures at 3 months; see Figure 5 above) allows for 80%-90%  
1076 power for detection of hazard ratios of 0.45-0.50 with 1% drop-out per month. (Based on  
1077 data from our pilot study, we expect a total of 5% drop-out over 12 months or about  
1078 0.5% per month.)  
1079

## 1080 **5.2 Interim Analysis**

1081 We will use the group sequential spending function approach to set guidelines for early  
1082 stopping for effectiveness based on the primary outcome FEF<sub>75</sub>. In particular, we  
1083 plan one interim and one final analysis using the O'Brien Fleming type spending  
1084 function as described by Proschan et al (90) with an overall type I error rate of 0.05.  
1085 Specifically we plan analyses after 102, and 218 patients complete the 3-month  
1086 pulmonary function tests. However, the spending function approach allows for  
1087 unforeseen changes in the number and/or timing of analyses. For example, if the DSMB  
1088 requests an additional interim analysis after the first one is complete, this is  
1089 accommodated by changing the nominal significance levels for the second analysis and  
1090 for the final analysis. The overall type I error rate will be maintained. The O'Brien  
1091 Fleming-type spending function is conservative in early analyses, requiring strong

1092 evidence for early stopping, but the critical value for the final analysis is close to what it  
1093 would have been without any interim analyses. The above are guidelines only for the  
1094 DSMB's consideration.

1095  
1096 **5.3 Analysis Plan (For additional detail for section 5.3 please see separate**  
1097 **document “Statistical Analysis Plan”(SAP))**

1098 Aim 1/Primary Outcome: Comparison of pulmonary function tests between infants  
1099 delivered to smoking mothers randomized to vitamin C versus placebo.

1100 **5.3.1 Analysis of Primary Outcome (forced expiratory flow at 75% of expired**  
1101 **volume, FEF<sub>75</sub>)**

1102 The primary analysis of the pulmonary function outcome (FEF<sub>75</sub>) will compare the FEF<sub>75</sub>  
1103 of infants born to mothers randomized to Vitamin C versus placebo, using mixed model  
1104 analysis of covariance (ANCOVA) regression analysis adjusting for the infant's sex,  
1105 maternal race as a binary variable i.e. white/non-white), age and length at the time of  
1106 FEF<sub>75</sub> measurement, and the stratification variables (site and gestational age at  
1107 randomization i.e. ≤18 weeks versus > 18 weeks). Although the infant's length is not a  
1108 baseline variable, forced expiratory flows are highly correlated with body length and are  
1109 a standard component in the interpretation of FEF<sub>75</sub> and similar measures (81, 82).  
1110 Since FEF<sub>75</sub> is not normally distributed, we will use for the primary analysis the natural  
1111 logarithmic transformation of FEF<sub>75</sub> to reduce expected skewness (91). Assessment of  
1112 outliers and influential points will be conducted and reported.

1113  
1114 **5.3.2 Supplementary Analyses**

1115 **5.3.2.1 Missing Data – For Further Detail see SAP, section 7**

1116 The primary analysis described above provides valid inference if the missing response  
1117 data is missing at random (MAR). Given that there is one measurement of the primary  
1118 outcome at 3 months, there is no opportunity to use prior measures. However, in the  
1119 case that the data are not missing at random (NMAR), then the proposed analyses can  
1120 be biased. By missing data, we refer to the primary outcome of FEF<sub>75</sub> as we expect to  
1121 have virtually complete data on the covariates for the primary model (maternal race as a  
1122 binary variable i.e. white/non-white), infant age, length, sex, site, and gestational age at  
1123 randomization).

1124  
1125 We will undertake several analyses to assess the impact of the missing response data  
1126 on our conclusions. See SAP section 7 for detailed plan for handling missing data.

1127  
1128

1129 **5.3.2.2 Pre-defined Subgroup Analyses for Comparison of FEF<sub>75</sub>**

1130 Additional comparisons of FEF<sub>75</sub> between treatment groups will be conducted for  
1131 defined sub-groups with significance values adjusted using the Holm multiple  
1132 comparison procedure (92).

- 1133
- 1134 1. By medication adherence
  - 1135 2. Infants by gestational age at birth <37 weeks versus ≥ 37 weeks;
  - 1136 3. Infants with and without maternal family history of asthma
  - 1137 4. Infants of mothers that had low versus high urine cotinine levels. We will  
1138 use the median cotinine level for smokers as the cutpoint for the low and  
1139 high cotinine level categories
  - 1140 5. Infants of mothers by genotype of alpha 5 nicotinic receptor (ASP/ASP,  
1141 ASP/ASN, ASN/ASN)
  - 1142 6. Infants of mothers with a pregravid BMI ≤ 35 versus > 35
  - 1143 7. By infant gender
  - 1144 8. By infant gestational age at randomization
- 1145  
1146

### 1147 **5.3.2.3 Additional Pulmonary Function Tests- See SAP for further detail**

1148 Although the primary endpoint is FEF<sub>75</sub>, similar analyses will be repeated for other  
1149 forced expiratory flow measures: FEF<sub>25-75</sub>, FEF<sub>50</sub>. Forced expiratory volumes will also  
1150 be evaluated including forced vital capacity (FVC), forced expired volume in the initial  
1151 0.4 sec (FEV<sub>0.4</sub>) and 0.5 sec (FEV<sub>0.5</sub>) and the ratio of FEV<sub>0.5</sub>/FVC.

### 1152 **5.3.2.4 Futility Analyses**

1153

1154 The study does not include plans for a formal futility analysis, although the DSMB can  
1155 recommend early termination of the study at any time. We will continue to collect data  
1156 through one year after delivery both to obtain 12 month pulmonary function tests and to  
1157 assess clinical outcomes to estimate the clinical benefit of therapy. This will be critical  
1158 information regardless of whether there is a difference in pulmonary function tests at  
1159 three months post-delivery. Although the pilot data support a change in pulmonary  
1160 function in the group randomized to vitamin C treatment, it is conceivable that the  
1161 benefit of vitamin C supplementation may be through a different mechanism other than  
1162 pulmonary function, such as immunologic or neurologic (78, 93) this would warrant  
1163 continued follow-up of patients to determine clinical outcome at 1 year. Additionally, at  
1164 the conclusion of the study, confidence intervals can be computed for all outcome  
1165 measures within each group and for the comparisons between groups. Allowing for  
1166 completion of the study in the presence of insignificant differences in primary pulmonary  
1167 function outcomes at interim analyses will yield greater precision for estimation of  
1168 pulmonary function and clinical outcomes.

### 1169 **5.3.2.5 Primary Analysis of Wheezing**

1170

1171 To compare the incidence of wheezing between the infants of mothers allocated to  
1172 vitamin C and placebo, we will utilize data obtained from a standardized respiratory  
1173 questionnaire (78) using self-report from parents asked about new episodes of  
1174 wheezing asked at least quarterly.. If an infant has wheezing associated with an illness

1175 lasting several days, this will be counted as one episode. The incidence of wheeze will  
1176 be compared between the two groups using a generalized linear mixed model  
1177 ANCOVA. The randomization variables and covariates will also be included in the  
1178 analysis. For further detail see separate Statistical Analysis Plan.

1179  
1180 **5.3.2.6 Additional Clinical Outcomes**

1181 We will report the incident bronchodilator use and healthcare provider diagnosis of  
1182 wheeze between the two groups.

1183 **5.3.2.7 Infant Pulmonary Function Testing at 12 Months of Age**

1184 This additional PFT at 12 months will allow us to track the effect on PFTs of the vitamin  
1185 C versus placebo allocation over time, to associate these PFTs with the incidence of  
1186 wheezing, and to potentially differentiate the impact of in-utero versus postnatal smoke  
1187 on infant PFTs. For further detail on this analysis see separate SAP.

1188  
1189 **6. Data Collection**

1190 **6.1 Data Collection Forms**

1191 Data will be collected on standardized forms on which nearly all responses have been  
1192 precoded.

1193 **6.2 Data Entry**

1194 The data collection protocol for the VCSIP study will utilize paper case report forms and  
1195 independent double data entry into a REDCap database. The data entry workflow and  
1196 validation scheme are illustrated in the following Figure 6:

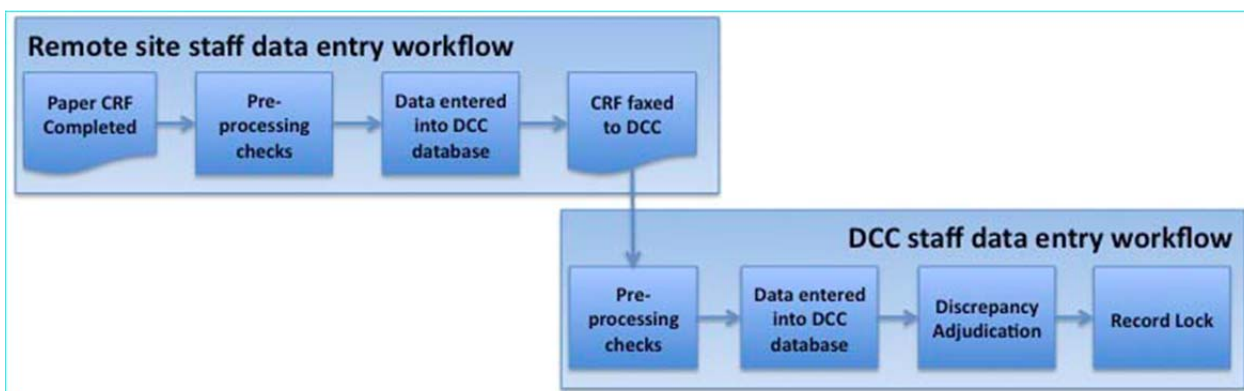

1197  
1198 The Data Coordinating Center will create all paper and electronic case report forms and  
1199 the manual of operations. Once the paper forms have been tested and validated, they  
1200 will be distributed to study sites. OHSU and Indiana site personnel will complete the  
1201 paper-based case report forms, perform pre-processing checks for completeness and  
1202 consistency of key data fields, and independently enter data into the study database via  
1203 secure web-based forms. The paper forms will be faxed or mailed to the DCC where the  
1204 data will be entered a second time and adjudicated against the original record entered.

1205 DCC staff will reconcile any discrepancies in coordination with clinical site staff and  
1206 record the disposition of any discrepancies found.

### 1207 **6.3 Data Management**

1208 Data will be collected within each study site by a combination of study-specific forms  
1209 that capture clinical information not routinely recorded in patient charts, by abstraction of  
1210 standard clinical information and outcomes from the records of patients, and by patient  
1211 self-reports. The case report forms will also serve as source documentation. We will  
1212 monitor for timely entry of data and faxing of case report forms by maintaining a study  
1213 calendar using the database's study and participant calendar feature and reviewing  
1214 expected visits, forms, and specimens on a weekly basis.

1215 The discrepancy management process includes a variety of important data quality  
1216 tasks. These include running production edit checks, reviewing data discrepancies  
1217 produced by edit checks, generating queries, resolving discrepancies, and updating any  
1218 relevant data in the database. In addition to the computerized checks, the data  
1219 management staff will conduct manual reviews of the data throughout the study and  
1220 these may generate additional discrepancies. All discrepancies will be reviewed by the  
1221 DCC staff who then either resolve the discrepancies or forward queries to each site for  
1222 clarification or resolution on data clarification forms. The sites will return the data  
1223 clarification forms after resolution. The data team will then modify the data with a full  
1224 audit trail generated for each modification.

1225

1226

### 1227 **6.4 Performance Monitoring**

1228 The DCC will present regular reports to the VCSIP Steering Committee and the Data  
1229 and Safety Monitoring Board. These include:

- 1230 • Monthly recruitment reports: reports of the number of women screened and enrolled  
1231 by month and by clinical center will be provided weekly and provided monthly to the  
1232 VCSIP Steering Committee.
  - 1233 • Quarterly Steering Committee reports: a report detailing recruitment, baseline patient  
1234 characteristics, data quality, incidence of missing data and adherence to study  
1235 protocol by clinical center, will be provided quarterly to the VCSIP Steering  
1236 Committee.
  - 1237 • Data and Safety Monitoring Board reports: for every meeting of the DSMB, a report  
1238 is prepared which includes adverse events, patient recruitment, retention, drug  
1239 adherence data, baseline patient characteristics, center performance information  
1240 with respect to data quality, timeliness of data submission and protocol adherence  
1241 (in addition to safety and efficacy data). Data will be reported by site. In addition, a  
1242 data report will be sent to the VITEL DSMB after 30-50 participants have been  
1243 randomized into the study with key demographic information included to evaluate for  
1244 significant confounders by site.
- 1245



1246

## 7. Study Administration

### 1247 7.1 Organization and Funding

1248 The study is funded jointly by the National Institute of Health's Heart, Lung and Blood  
1249 Institute (NHLBI) and the Office of Dietary Supplements. The study is conducted at two  
1250 clinical centers (Portland, Oregon and Indianapolis, Indiana) and the Data Coordinating  
1251 Center at OHSU.

1252

#### 1253 7.1.1 Participating Clinical Centers

1254 The Principal Investigators of the clinical centers have agreed to abide by the study  
1255 protocol, to have comparable staff, facilities and equipment and to ensure the proper  
1256 conduct of the study at each of their centers including: recruitment and treatment of  
1257 patients as specified in the protocol, accurate data collection and the transmission of  
1258 information to the Steering Committee.

1259

#### 1260 7.1.2 Data Coordinating Center

1261 The DCC is responsible for all aspects of biostatistical design, data management,  
1262 interim and final statistical analyses. The Principal Investigator of the DCC reports to the  
1263 Steering Committee and the Data and Safety Monitoring Committee.

1264

1265

1266

1267

### 1268 7.2 Committees

1269

#### 1270 7.2.1 Steering Committee

1271 The VCSIP Steering Committee will be co-chaired by Drs McEvoy and Morris to further  
1272 preserve DCC independence. Drs. McEvoy and Tepper will contact Dr Morris in the  
1273 event there are any concerns regarding data analysis or data management. The  
1274 Steering committee will consist of Drs. McEvoy, Morris, Tepper, Spindel, Peters and  
1275 Robert Schuff.

1276

#### 1277 7.2.2 Data and Safety Monitoring Board

1278 The DSMB will be appointed by the NHLBI and will be a group of individuals not  
1279 affiliated with any of the institutions. Before the trial can begin, the protocol must be  
1280 approved by the committee. During the conduct of the study, the committee is charged  
1281 with monitoring the emerging results for efficacy and safety, in addition to center  
1282 performance and protocol adherence. Recommendations by the committee can include  
1283 protocol modification, early termination for efficacy, or for unexpected safety problems.

1284 Recommendations are made to the NHLBI and disseminated to the Steering  
 1285 Committee.

1286 **8. Study Timeline**

1287 **Figure 7. Study Timeline**

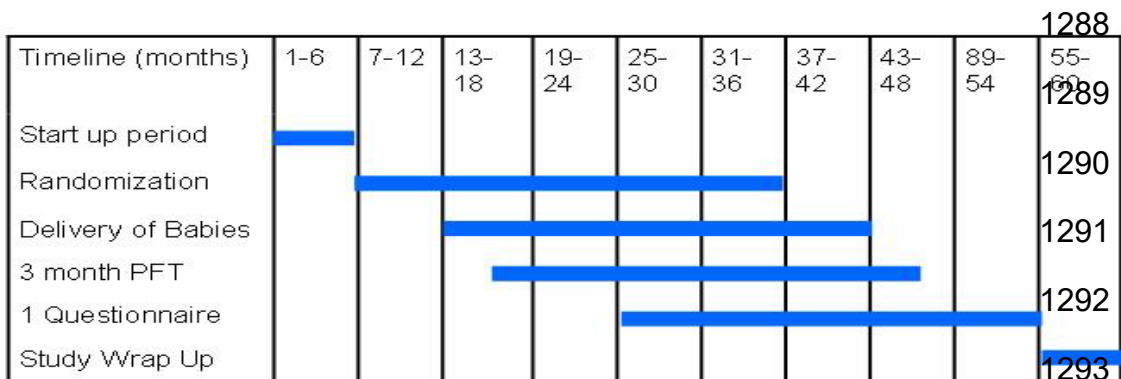

1294 **8.1 Training and Certification**

1295 Prior to the beginning of the study, research coordinators and study staff will undergo  
 1296 training on all aspects of data collection and procedures at either OHSU in Portland, OR  
 1297 or UI in Indianapolis. Both participating centers must be certified in all study procedures  
 1298 before patient recruitment can begin.

1300 **8.2 Recruitment and Data Collection Period**

1301 The proposed grant period is for 5 years. There were 9,660 deliveries last year from the  
 1302 practices this study will recruit from which offers a robust patient population (See Table  
 1303 below). The rate of smoking during pregnancy varies from 12 to 35% in these practices.  
 1304 This population will allow us to meet our desired sample size of at least 330 patients  
 1305 consented over 30 months (see Figure 5 for projected recruitment). The study will have  
 1306 a 6 month start-up period. Patient recruitment and follow-up will occur over 30 months  
 1307 (month 7 through 37). The delivery of the infants of women recruited and randomized  
 1308 are projected to occur in months 12 to 42 with 3-month PFTs performed from month 15  
 1309 through 45. Serial questionnaires culminating in the one year questionnaire will be  
 1310 completed in months 24 through 54 with the final 6 months to complete final data  
 1311 analysis.

1312 **Table 5. Potential Recruitments for Study**

| Hospital    | Deliveries/<br>year | Smokers<br>(%) | Smokers<br>available/year | Smokers<br>available/month | Needed#/month<br>for sample size |
|-------------|---------------------|----------------|---------------------------|----------------------------|----------------------------------|
| OHSU        | 2362                | 12             | 283                       | 23                         | 2-3                              |
| Southwest   | 3500                | 12             | 420                       | 35                         | 2-3                              |
| Wishard     | 2500-3000           | 35             | 875-1050                  | 73 - 88                    | 4-5                              |
| IU Hospital | 800                 | 35             | 280                       | 23                         | 1-2                              |

1313

1314 **8.3 Final Analysis**

1315 After a two month period for completion of data entry for the trial, the data set will be  
1316 locked and available for analysis. Approximately six months will be required to complete  
1317 the final report to the VCSIP Steering Committee and to submit the study's primary  
1318 report for publication.

1319

1320

1321

1322

1323

1324

1325

1326

1327

1328

1329

1330

1331

1332

1333

1334

1335

1336

1337

1338

1339

1340

Reference List

- 1341 (1) Tong VT, Jones JR, Dietz PM, D'Angelo D, Bombard JM. Trends in smoking  
1342 before, during, and after pregnancy - Pregnancy Risk Assessment Monitoring  
1343 System (PRAMS), United States, 31 sites, 2000-2005. *MMWR Surveill Summ*  
1344 2009 ; 58:1-29.
- 1345 (2) US Department of Health and Human Services. The Health Consequences of  
1346 Involuntary Exposure to Tobacco Smoke: A Report of the Surgeon General—  
1347 Executive Summary. Centers for Disease Control and Prevention; 2006.
- 1348 (3) United States Department of Health and Human Services, Centers for Disease  
1349 Control and Prevention: Health Consequences of tobacco use among women. In  
1350 *Women and smoking: A resort of the surgeon general*; 2001.
- 1351 (4) Hayatbakhsh MR, Sadasivam S, Mamun AA, Najman JM, O'callaghan MJ.  
1352 Maternal smoking during and after pregnancy and lung function in early  
1353 adulthood: A prospective study. *Thorax* 2009;64:810-4.
- 1354 (5) Best D. From the American Academy of Pediatrics: Technical report--  
1355 Secondhand and prenatal tobacco smoke exposure. *Pediatrics* 2009 ;124:e1017-  
1356 e1044.
- 1357 (6) Proskocil BJ, Sekhon HS, Clark JA, Lupo SL, Jia Y, Hull WM, et al. Vitamin C  
1358 Prevents the Effects of Prenatal Nicotine on Pulmonary Function in Newborn  
1359 Monkeys. *Am J Respir Crit Care Med* 2005;171:1032-9.
- 1360 (7) McEvoy C, Schilling D, Clay N, Go M, Spitale P, Bunten C, Leiva M, Hollister-  
1361 Smith J, Durand M, Frei B, Buist AS, Peters D, Morris C, Spindel E. Daily Vitamin  
1362 C Improves Pulmonary Function in Newborns of Pregnant Smoking Women: A  
1363 Randomized Trial. *Am J Respir Crit Care Med* 2012; A3899.
- 1364 (8) Leung GM, Ho LM, Lam TH. The economic burden of environmental tobacco  
1365 smoke in the first year of life. *Arch Dis Child* 2003;88:767-71.
- 1366 (9) Stoddard JJ, Gray B. Maternal smoking and medical expenditures for childhood  
1367 respiratory illness. *Am J Public Health* 1997;87:205-9.
- 1368 (10) Tager IB, Weiss ST, Munoz A, Rosner B, Speizer FE. Longitudinal study of the  
1369 effects of maternal smoking on pulmonary function in children. *N Engl J Med*  
1370 1983;309:699-703.
- 1371 (11) Hanrahan JP, Tager IB, Segal MR, Tosteson TD, Castile RG, Van Vunakis H, et  
1372 al. The effect of maternal smoking during pregnancy on early infant lung function.  
1373 *Am Rev Respir Dis* 1992;145:1129-35.

- 1374 (12) Hoo AF, Henschen M, Dezateux C, Costeloe K, Stocks J. Respiratory function  
1375 among preterm infants whose mothers smoked during pregnancy. *Am J Respir*  
1376 *Crit Care Med* 1998;158:700-5.
- 1377 (13) Milner AD, Marsh MJ, Ingram DM, Fox GF, Susiva C. Effects of smoking in  
1378 pregnancy on neonatal lung function. *Arch Dis Child Fetal Neonatal Ed* 1999  
1379 ;80:F8-14.
- 1380 (14) Tager IB, Hanrahan JP, Tosteson TD, Castile RG, Brown RW, Weiss ST, et al.  
1381 Lung function, pre- and post-natal smoke exposure, and wheezing in the first  
1382 year of life. *Am Rev Respir Dis* 1993;147:811-7.
- 1383 (15) Cunningham J, Dockery DW, Speizer FE. Maternal smoking during pregnancy as  
1384 a predictor of lung function in children. *Am J Epidemiol* 1994;139:1139-52.
- 1385 (16) Brown RW, Hanrahan JP, Castile RG, Tager IB. Effect of maternal smoking  
1386 during pregnancy on passive respiratory mechanics in early infancy. *Pediatr*  
1387 *Pulmonol* 1995 ;19:23-8.
- 1388 (17) Stick SM, Burton PR, Gurrin L, Sly PD, LeSouef PN. Effects of maternal smoking  
1389 during pregnancy and a family history of asthma on respiratory function in  
1390 newborn infants. *Lancet* 1996;348:1060-4.
- 1391 (18) Lodrup Carlsen KC, Jaakkola JJ, Nafstad P, Carlsen KH. In utero exposure to  
1392 cigarette smoking influences lung function at birth. *Eur Respir J* 1997 ;10:1774-9.
- 1393 (19) Li YF, Gilliland FD, Berhane K, McConnell R, Gauderman WJ, Rappaport EB, et  
1394 al. Effects of in utero and environmental tobacco smoke exposure on lung  
1395 function in boys and girls with and without asthma. *Am J Respir Crit Care Med*  
1396 2000;162:2097-104.
- 1397 (20) Adler A, Tager IB, Brown RW, Ngo L, Hanrahan JP. Relationship between an  
1398 index of tidal flow and lower respiratory illness in the first year of life. *Pediatr*  
1399 *Pulmonol* 1995;20:137-44.
- 1400 (21) Martinez FD, Morgan WJ, Wright AL, Holberg CJ, Taussig LM. Diminished lung  
1401 function as a predisposing factor for wheezing respiratory illness in infants. *N*  
1402 *Engl J Med* 1988;319:1112-7.
- 1403 (22) Dezateux C, Stocks J, Dundas I, Fletcher ME. Impaired Airway Function and  
1404 Wheezing in Infancy. The influence of maternal smoking and a genetic  
1405 predisposition to asthma. *Am J Respir Crit Care Med* 1999;159:403-10.
- 1406 (23) Haland G, Carlsen KC, Sandvik L, Devulapalli CS, Munthe-Kaas MC, Pettersen  
1407 M, et al. Reduced lung function at birth and the risk of asthma at 10 years of age.  
1408 *N Engl J Med* 2006;355):1682-9.

- 1409 (24) Yuksel B, Greenough A, Giffin F, Nicolaidides KH. Tidal breathing parameters in  
1410 the first week of life and subsequent cough and wheeze. *Thorax* 1996;51:815-8.
- 1411 (25) Young S, Arnott J, O'Keeffe PT, Le Souef PN, Landau LI. The association  
1412 between early life lung function and wheezing during the first 2 yrs of life. *Eur*  
1413 *Respir J* 2000;15:151-7.
- 1414 (26) Turner SW, Palmer LJ, Rye PJ, Gibson NA, Judge PK, Cox M, et al. The  
1415 relationship between infant airway function, childhood airway responsiveness,  
1416 and asthma. *Am J Respir Crit Care Med* 2004;169:921-7.
- 1417 (27) Rantakallio P. Relationship of maternal smoking to morbidity and mortality of the  
1418 child up to the age of five. *Acta Paediatr Scand* 1978;67:621-31.
- 1419 (28) Fergusson DM, Horwood LJ, Shannon FT. Parental smoking and respiratory  
1420 illness in infancy. *Arch Dis Child* 1980;55:358-61.
- 1421 (29) Taylor B, Wadsworth J. Maternal smoking during pregnancy and lower  
1422 respiratory tract illness in early life. *Archives of Disease in Childhood* 1987  
1423 ;62:786-91.
- 1424 (30) Margolis PA, Keyes LL, Greenberg RA, Bauman KE, LaVange LM. Urinary  
1425 cotinine and parent history (questionnaire) as indicators of passive smoking and  
1426 predictors of lower respiratory illness in infants. *Pediatr Pulmonol* 1997 ;23:417-  
1427 23.
- 1428 (31) Hu FB, Persky V, Flay BR, Zelli A, Cooksey J, Richardson J. Prevalence of  
1429 asthma and wheezing in public schoolchildren: association with maternal  
1430 smoking during pregnancy. *Ann Allergy Asthma Immunol* 1997;79:80-4.
- 1431 (32) Zlotkowska R, Zejda JE. Fetal and postnatal exposure to tobacco smoke and  
1432 respiratory health in children. *Eur J Epidemiol* 2005;20:719-27.
- 1433 (33) Lannero E, Pershagen G, Wickman M, Nordvall L. Maternal smoking during  
1434 pregnancy increases the risk of recurrent wheezing during the first years of life  
1435 (BAMSE). *Respir Res* 2006 5;7:3.
- 1436 (34) Wenten M, Li YF, Lin PC, Gauderman WJ, Berhane K, Avol E, et al. In utero  
1437 smoke exposure, glutathione S-transferase P1 haplotypes, and respiratory  
1438 illness-related absence among schoolchildren. *Pediatrics* 2009;123:1344-51.
- 1439 (35) Murdzoska J, Devadason SG, Khoo SK, Landau LI, Young S, Goldblatt J, et al.  
1440 In utero Smoke Exposure and Maternal and Infant GST Genes on Airway  
1441 Responsiveness and Lung Function In Infancy. *Am J Respir Crit Care Med* 2010  
1442 ;181:64-71.

- 1443 (36) Morales E, Sunyer J, Julvez J, Castro-Giner F, Estivill X, Torrent M, et al.  
 1444 GSTM1 polymorphisms modify the effect of maternal smoking during pregnancy  
 1445 on cognitive functioning in preschoolers. *Int J Epidemiol* 2009;38:690-7.
- 1446 (37) Gilliland FD, Li YF, Dubeau L, Berhane K, Avol E, McConnell R, et al. Effects of  
 1447 glutathione S-transferase M1, maternal smoking during pregnancy, and  
 1448 environmental tobacco smoke on asthma and wheezing in children. *Am J Respir  
 1449 Crit Care Med* 2002;166:457-63.
- 1450 (38) Breton CV, Byun HM, Wenten M, Pan F, Yang A, Gilliland FD. Prenatal tobacco  
 1451 smoke exposure affects global and gene-specific DNA methylation. *Am J Respir  
 1452 Crit Care Med* 2009;180:462-7.
- 1453 (39) Berrettini W, Yuan X, Tozzi F, Song K, Francks C, Chilcoat H, et al. Alpha-  
 1454 5/alpha-3 nicotinic receptor subunit alleles increase risk for heavy smoking. *Mol  
 1455 Psychiatry* 2008;13:368-73.
- 1456 (40) DiFranza JR, Wellman RJ, Sargent JD, Weitzman M, Hipple BJ, Winickoff JP.  
 1457 Tobacco promotion and the initiation of tobacco use: assessing the evidence for  
 1458 causality. *Pediatrics* 2006;117:e1237-e1248.
- 1459 (41) Anderson SJ, Glantz SA, Ling PM. Emotions for sale: cigarette advertising and  
 1460 women's psychosocial needs. *Tob Control* 2005;14:127-35.
- 1461 (42) Schroeder SA. Tobacco control in the wake of the 1998 master settlement  
 1462 agreement. *N Engl J Med* 2004;350:293-301.
- 1463 (43) Wang JC, Cruchaga C, Saccone NL, Bertelsen S, Liu P, Budde JP, et al. Risk for  
 1464 nicotine dependence and lung cancer is conferred by mRNA expression levels  
 1465 and amino acid change in *CHRNA5*. *Hum Mol Genet* 2009;18:3125-35.
- 1466 (44) Saccone SF, Hinrichs AL, Saccone NL, Chase GA, Konvicka K, Madden PA, et  
 1467 al. Cholinergic nicotinic receptor genes implicated in a nicotine dependence  
 1468 association study targeting 348 candidate genes with 3713 SNPs. *Hum Mol  
 1469 Genet* 2007;16:36-49.
- 1470 (45) Bierut LJ, Madden PA, Breslau N, Johnson EO, Hatsukami D, Pomerleau OF, et  
 1471 al. Novel genes identified in a high-density genome wide association study for  
 1472 nicotine dependence. *Hum Mol Genet* 2007;16:24-35.
- 1473 (46) Mohsin M, Bauman AE. Socio-demographic factors associated with smoking and  
 1474 smoking cessation among 426,344 pregnant women in New South Wales,  
 1475 Australia. *BMC Public Health* 2005;5:138.
- 1476 (47) Kahn RS, Certain L, Whitaker RC. A reexamination of smoking before, during,  
 1477 and after pregnancy. *Am J Public Health* 2002;92:1801-8.

- 1478 (48) Smoking prevalence among women of reproductive age--United States, 2006.  
1479 MMWR Morb Mortal Wkly Rep 2008;57:849-52.
- 1480 (49) Cigarette smoking among adults and trends in smoking cessation - United  
1481 States, 2008. MMWR Morb Mortal Wkly Rep 2009;58:1227-32.
- 1482 (50) Cigarette use among high school students--United States, 1991-2007. MMWR  
1483 Morb Mortal Wkly Rep 2008;57:686-8.
- 1484 (51) Bruin JE, Petre MA, Lehman MA, Raha S, Gerstein HC, Morrison KM, et al.  
1485 Maternal nicotine exposure increases oxidative stress in the offspring. Free  
1486 Radic Biol Med 2008;44:1919-25.
- 1487 (52) Gunes T, Koklu E, Gunes I, Narin F, Koklu S. Influence of maternal nicotine  
1488 exposure on neonatal rat oxidant-antioxidant system and effect of ascorbic acid  
1489 supplementation. Hum Exp Toxicol 2008;27:781-6.
- 1490 (53) Jaimes E, Tian RX, Raji L. Nicotine: The Link Between Cigarette Smoking and  
1491 the Progression of Renal Injury? Am J Physiol Heart Circ Physiol 2007; 292:  
1492 H76-82.
- 1493 (54) Ozokutan BH, Ozkan KU, Sari I, Inanc F, Guldur ME, Kilinc M. Effects of  
1494 Maternal Nicotine Exposure during Lactation on Breast-Fed Rat Pups. Biol  
1495 Neonate 2005;88:113-7.
- 1496 (55) Levine M, Wang Y, Padayatty SJ, Morrow J. A new recommended dietary  
1497 allowance of vitamin C for healthy young women. Proc Natl Acad Sci U S A 2001  
1498 ;98:9842-6.
- 1499 (56) Institute of Medicine NAOs. Dietary Reference Intakes for Vitamin C, Vitamin E,  
1500 Selenium, and Carotenoids. Washington, DC: National Academy Press; 2000.
- 1501 (57) Britton JR, Pavord ID, Richards KA, Knox AJ, Wisniewski AF, Lewis SA, et al.  
1502 Dietary antioxidant vitamin intake and lung function in the general population. Am  
1503 J Respir Crit Care Med 1995;151:1383-7.
- 1504 (58) Rumbold A, Crowther CA. Vitamin C supplementation in pregnancy. Cochrane  
1505 Database Syst Rev 2005;2:CD004072.
- 1506 (59) Steyn PS, Odendaal HJ, Schoeman J, Stander C, Fanie N, Grove D. A  
1507 randomised, double-blind placebo-controlled trial of ascorbic acid  
1508 supplementation for the prevention of preterm labour. J Obstet Gynaecol 2003  
1509 23:150-5.
- 1510 (60) Roberts JM, Myatt L, Spong CY, Thom EA, Hauth JC, Leveno KJ, et al. Vitamins  
1511 C and E to prevent complications of pregnancy-associated hypertension. N Engl  
1512 J Med 2010;362:1282-91.



- 1513 (61) United States Department of Health and Human Services. Treating Tobacco Use  
1514 and Dependence. 2000.
- 1515 (62) Gonzales D, Bjornson W, Durcan MJ, White JD, Johnston JA, Buist AS, et al.  
1516 Effects of gender on relapse prevention in smokers treated with bupropion SR.  
1517 Am J Prev Med 2002;22:234-9.
- 1518 (63) Hays JT, Hurt RD, Rigotti NA, Niaura R, Gonzales D, Durcan MJ, et al.  
1519 Sustained-release bupropion for pharmacologic relapse prevention after smoking  
1520 cessation. a randomized, controlled trial. Annals of Internal Medicine 2001  
1521 ;135:423-33.
- 1522 (64) Ershoff DH, Quinn VP, Boyd NR, Stern J, Gregory M, Wirtschafter D. The Kaiser  
1523 Permanente prenatal smoking-cessation trial: when more isn't better, what is  
1524 enough? Am J Prev Med 1999;17:161-8.
- 1525 (65) O'Campo P, Davis MV, Gielen AC. Smoking cessation interventions for pregnant  
1526 women: review and future directions. Seminars in Perinatology 1995;19:279-85.
- 1527 (66) Van't Hof, S. M., M. A. Wall, D. W. Dowler, and M. J. Stark. Randomised controlled  
1528 trial of a postpartum relapse prevention intervention. *Tob.Control* 2000; 9:Suppl-6.
- 1529 (67) Ferris BG. Epidemiology Standardization Project (American Thoracic Society).  
1530 Am Rev Respir Dis 1978;118:1-120.
- 1531 (68) Benowitz NL, Hukkanen J, Jacob P, III. Nicotine chemistry, metabolism, kinetics  
1532 and biomarkers. *Handb Exp Pharmacol* 2009;192:29-60.
- 1533 (69) Frei B. Efficacy of dietary antioxidants to prevent oxidative damage and inhibit  
1534 chronic disease. *J Nutr* 2004 Nov;134(11):3196S-8S.
- 1535 (70) Hegstad S, Khiabani HZ, Kristoffersen L, Kunoe N, Lobmaier PP, Christophersen  
1536 AS. Drug screening of hair by liquid chromatography-tandem mass spectrometry.  
1537 *J Anal Toxicol* 2008;32:364-72.
- 1538 (71) Fagerstrom KO. Assessment of the smoker who wants to quit. *Monaldi Arch*  
1539 *Chest Dis* 2001 ;56:124-7.
- 1540 (72) Rasanen J, Wood DC, Debbs RH, Cohen J, Weiner S, Huhta JC. Reactivity of  
1541 the human fetal pulmonary circulation to maternal hyperoxygenation increases  
1542 during the second half of pregnancy: a randomized study. *Circulation* 1998  
1543 27;97:257-62.
- 1544 (73) Breton CV, Byun HM, Wenten M, Pan F, Yang A, Gilliland FD. Prenatal tobacco  
1545 smoke exposure affects global and gene-specific DNA methylation. *Am J Respir*  
1546 *Crit Care Med* 2009; 180:462-467.

- 1547 (74) McEvoy C, Schilling D Peters D Tillotson C Spitale P Wallen L Segel S Bowling S  
1548 Gravett M Durand M. 2010. Respiratory compliance in preterm infants after a  
1549 single rescue course of antenatal steroids: A randomized controlled trial. *Am J*  
1550 *Obstet Gynecol* 202; 544.e1-544.e9.
- 1551 (75) McEvoy C, Bowling S, Williamson K, Lozano D, Tolaymat L, Izquierdo L, et al.  
1552 The effect of a single remote course versus weekly courses of antenatal  
1553 corticosteroids on functional residual capacity in preterm infants: a randomized  
1554 trial. *Pediatrics* 2002;110:1-4.
- 1555 (76) McEvoy C, Schilling D, Spitale P, Peters D, O'Malley J, Durand M. Decreased  
1556 respiratory compliance in infants less than or equal to 32 weeks' gestation,  
1557 delivered more than 7 days after antenatal steroid therapy. *Pediatrics* 2008  
1558 ;121:e1032-e1038.
- 1559 (77) Camargo CA, Jr., Rifas-Shiman SL, Litonjua AA, Rich-Edwards JW, Weiss ST,  
1560 Gold DR, et al. Maternal intake of vitamin D during pregnancy and risk of  
1561 recurrent wheeze in children at 3 y of age. *Am J Clin Nutr* 2007;85:788-95.
- 1562 (78) Devereux G, Litonjua AA, Turner SW, Craig LC, McNeill G, Martindale S, et al.  
1563 Maternal vitamin D intake during pregnancy and early childhood wheezing. *Am J*  
1564 *Clin Nutr* 2007;85:853-9.
- 1565 (79) Weiss ST, Litonjua AA. The In Utero Effects of Maternal Vitamin D Deficiency:  
1566 How it Results in Asthma and Other Chronic Diseases. *Am J Respir Crit Care*  
1567 *Med* 2011 May 15;183(10):1286-7.
- 1568 (80) Joad JP. Smoking and pediatric respiratory health. *Clin Chest Med* 2000 ;21:37-  
1569 46.
- 1570 (81) Beydon N, Davis SD, Lombardi E, Allen JL, Arets HG, Aurora P, et al. An official  
1571 American Thoracic Society/European Respiratory Society statement: pulmonary  
1572 function testing in preschool children. *Am J Respir Crit Care Med* 2007  
1573 ;175:1304-45.
- 1574 (82) Jones M, Castile R, Davis S, Kisling J, Filbrun D, Flucke R, et al. Forced  
1575 expiratory flows and volumes in infants. Normative data and lung growth. *Am J*  
1576 *Respir Crit Care Med* 2000;161:353-9.
- 1577 (83) Yao, W., F. M. Barbe-Tuana, C. J. Llapur, M. H. Jones, C. Tiller, R. Kimmel, J.  
1578 Kisling, E. T. Nguyen, J. Nguyen, Z. Yu, M. H. Kaplan, and R. S. Tepper.  
1579 Evaluation of airway reactivity and immune characteristics as risk factors for  
1580 wheezing early in life. *J.Allergy Clin.Immunol.* 2010; 126:483-488.
- 1581 (84) Cote CJ, Zaslavsky A, Downes JJ, Kurth CD, Welborn LG, Warner LO, et al.  
1582 Postoperative apnea in former preterm infants after inguinal herniorrhaphy. A  
1583 combined analysis. *Anesthesiology* 199 ;82:809-22.

- 1584 (85) Malviya S, Voepel-Lewis T, Ludomirsky A, Marshall J, Tait AR. Can we improve  
1585 the assessment of discharge readiness?: A comparative study of observational  
1586 and objective measures of depth of sedation in children. *Anesthesiology* 2004  
1587 ;100:218-24.
- 1588 (86) Mayers DJ, Hindmarsh KW, Sankaran K, Gorecki DK, Kasian GF. Chloral  
1589 hydrate disposition following single-dose administration to critically ill neonates  
1590 and children. *Dev Pharmacol Ther* 1991;16:71-7.
- 1591 (87) Al-Delaimy WK. Hair as a biomarker for exposure to tobacco smoke. *Tob Control*  
1592 2002;11:176-82.
- 1593 (88) Al-Delaimy WK, Crane J, Woodward A. Is the hair nicotine level a more accurate  
1594 biomarker of environmental tobacco smoke exposure than urine cotinine? *J*  
1595 *Epidemiol Community Health* 2002;56:66-71.
- 1596 (89) U.S.Department of Health and Human Services, National Institutes of Health,  
1597 National Hear LaBI, Natinoal Asthma Education and Prevention Program. Expert  
1598 Panel Report-Update 2002. Expert panel report: guidelines for the diagnosis and  
1599 management of asthma. Update on selected topics 2002 (EPR-UPDATE 2002).  
1600 NIH Publication No 02 5074. 2003 Jun.
- 1601 (90) Proschan MA LKWJ. *Statistical Monitoring of Clinical Trials A Unified Approach.*  
1602 New York: Springer Science & Business Media; 2008.
- 1603 (91) American Thoracic Society. Lung function testing: selection of reference values  
1604 and interpretative strategies. *Am Rev Respir Dis* 1991;144:1202-18.
- 1605
- 1606 (92) Holm S. A simple sequentially rejective multiple test procedure. *Scand J Stat*  
1607 2012;28:65-70.
- 1608 (93) Slotkin TA, Seidler FJ, Qiao D, Aldridge JE, Tate CA, Cousins MM, et al. Effects  
1609 of prenatal nicotine exposure on primate brain development and attempted  
1610 amelioration with supplemental choline or vitamin C: neurotransmitter receptors,  
1611 cell signaling and cell development biomarkers in fetal brain regions of rhesus  
1612 monkeys. *Neuropsychopharmacology* 2005;30:129-44.

## APPENDIX A: Study Design

| Vitamin C to Decrease the Effects of Smoking in Pregnancy on Infant Lung Function. A Randomized Trial                                                              |                                                                                                                                                                                                                                                             |                                                              |                                                                                                                                   |
|--------------------------------------------------------------------------------------------------------------------------------------------------------------------|-------------------------------------------------------------------------------------------------------------------------------------------------------------------------------------------------------------------------------------------------------------|--------------------------------------------------------------|-----------------------------------------------------------------------------------------------------------------------------------|
| <b>OBJECTIVE:</b> To determine the effect of vitamin C supplementation initiated $\leq 22$ weeks gestation on pulmonary function in infants born to smoking women. |                                                                                                                                                                                                                                                             |                                                              |                                                                                                                                   |
| Clinical Centers:                                                                                                                                                  | Oregon Health & Science University and Indiana University School of Medicine                                                                                                                                                                                |                                                              |                                                                                                                                   |
| <b>DESIGN:</b>                                                                                                                                                     | Double-masked randomized clinical trial                                                                                                                                                                                                                     | <b>SCHEDULED STUDY VISITS AND DATA COLLECTION, CONTINUED</b> |                                                                                                                                   |
| Major Eligibility Criteria:                                                                                                                                        | Gestational age 13 <sup>0/7</sup> – 22 <sup>6/7</sup><br>Current cigarette smoker<br>Singleton gestation<br>Informed consent                                                                                                                                | Delivery                                                     | Cord blood<br>Placenta<br>Hair<br>Smoking questionnaires<br>Chart review for diagnostic criteria<br>Review of contact information |
| Groups:                                                                                                                                                            | Experimental: 500 mg vitamin C<br>Control: Placebo                                                                                                                                                                                                          | Post-Delivery                                                | PFT at 48 hours (Pacific Northwest only), 3 months and 12 months; respiratory questionnaire at least quarterly                    |
| Random Allocation                                                                                                                                                  | Permuted block design                                                                                                                                                                                                                                       | <b>OUTCOME MEASURES</b>                                      |                                                                                                                                   |
| Stratification                                                                                                                                                     | Clinical center and gestational age ( $\leq 18$ weeks ; $>18$ weeks)                                                                                                                                                                                        | Primary Outcome                                              | PFT at 3 months                                                                                                                   |
|                                                                                                                                                                    |                                                                                                                                                                                                                                                             | Secondary outcomes                                           | PFT at 12 months; Incidence and prevalence of wheezing through 12 months                                                          |
| Sample Size                                                                                                                                                        | 252                                                                                                                                                                                                                                                         | <b>TIMELINE</b>                                              |                                                                                                                                   |
| Statistical Assumptions                                                                                                                                            | 90% Power to show 15% difference between groups                                                                                                                                                                                                             | Enrollment                                                   | Dec 2012 - June 2015 (months 7 – 37)<br>Average recruitment should be 5 patients per institution per month after ramp-up          |
| Interim analysis                                                                                                                                                   | Group sequential spending method                                                                                                                                                                                                                            | Delivery                                                     | May 2013 - Nov 2015 (months 12-42 )                                                                                               |
| <b>SCHEDULED STUDY VISITS AND DATA COLLECTION</b>                                                                                                                  |                                                                                                                                                                                                                                                             | PFTs @ 3 months                                              | Aug 2013 – Feb 2016 (months 15–45)                                                                                                |
| Pre-randomization                                                                                                                                                  | Health & Med History                                                                                                                                                                                                                                        | PFTs @ 12 months                                             | May 2014 – Nov 2016 (months 25-54)                                                                                                |
|                                                                                                                                                                    | Dating ultrasound required                                                                                                                                                                                                                                  | Closeout/Final Analysis                                      | Dec 2016 – May 2017 (months 55-60)                                                                                                |
|                                                                                                                                                                    | Demographics/Contact info                                                                                                                                                                                                                                   |                                                              |                                                                                                                                   |
|                                                                                                                                                                    | Smoking questionnaire                                                                                                                                                                                                                                       |                                                              |                                                                                                                                   |
|                                                                                                                                                                    | Distribute compliance meds                                                                                                                                                                                                                                  |                                                              |                                                                                                                                   |
|                                                                                                                                                                    | Urine, blood and hair samples                                                                                                                                                                                                                               |                                                              |                                                                                                                                   |
|                                                                                                                                                                    | Exhaled CO                                                                                                                                                                                                                                                  |                                                              |                                                                                                                                   |
|                                                                                                                                                                    | Conversant consent                                                                                                                                                                                                                                          |                                                              |                                                                                                                                   |
| Post-randomization                                                                                                                                                 | Evaluate q 4 weeks for compliance, side effects and AEs; smoking questionnaire; collect maternal hair sample at visit prior to delivery; blood, urine and exhaled CO at 26 and 32 wks; monitor weight and BP from chart; genetics consent prior to delivery |                                                              |                                                                                                                                   |

1614

## APPENDIX B: Study Visit Flow Sheet

1615

|                                                                               | STUDY VISITS |        |        |        |        |        |                  |         |          |
|-------------------------------------------------------------------------------|--------------|--------|--------|--------|--------|--------|------------------|---------|----------|
|                                                                               | V1           | V2     | V3     | V4     | V5     | V6     | V7<br>(delivery) | V8      | V9       |
| Weeks gestation (estimated)                                                   | 12<= 21      | 13<=22 | 17<=26 | 21<=30 | 25<=34 | 29<=38 | 39<=42           | Month 3 | Month 12 |
| Screening                                                                     | X            |        |        |        |        |        |                  |         |          |
| Health/Med History                                                            | X            |        |        |        |        |        |                  |         |          |
| Demographic/Contact Info                                                      | X            |        |        |        |        |        |                  |         |          |
| Consent/HIPPA                                                                 | X            |        |        |        |        |        |                  |         |          |
| Height, weight, BP from chart                                                 | X            | X      | X      | X      | X      | X      | X                |         |          |
| Smoking questionnaire                                                         | X            | X      | X      | X      | X      | X      | X                |         |          |
| Dispense compliance meds                                                      | X            |        |        |        |        |        |                  |         |          |
| Ultrasound confirmed                                                          | X            | X      |        |        |        |        |                  |         |          |
| Schedule FU appointment                                                       | X            | X      | X      | X      | X      | X      | X                | X       |          |
| Between visit phone call                                                      | X            | X      | X      | X      | X      | X      | X                | X       | X        |
| Assess run-in compliance                                                      |              | X      |        |        |        |        |                  |         |          |
| RANDOMIZATION                                                                 |              | X      |        |        |        |        |                  |         |          |
| Dispense study meds                                                           |              | X      |        |        | X      |        |                  |         |          |
| Fasting blood draw Vit C                                                      |              | X      |        | X      |        | X      |                  |         |          |
| Urine for cotinine, isoprostanes                                              |              | X      |        | X      |        | X      |                  |         |          |
| Additional blood/urine aliquots                                               |              | X      |        | X      |        | X      |                  |         |          |
| Exhaled Carbon Monoxide*                                                      |              | X      |        | X      |        | X      |                  | X       | X        |
| Hair nicotine (mom)*                                                          |              | X      |        |        |        |        | X                | X       | X        |
| Health/Med hx change                                                          |              | X      | X      | X      | X      | X      | X                |         |          |
| Contact Info change                                                           |              | X      | X      | X      | X      | X      | X                | X       |          |
| Pill counts                                                                   |              |        | X      | X      | X      | X      | X                |         |          |
| Consent for genetics testing (on or before this date)                         |              |        |        |        |        | X      |                  |         |          |
| Cord blood sample                                                             |              |        |        |        |        |        | X                |         |          |
| Placenta collection and processing samples                                    |              |        |        |        |        |        | X                |         |          |
| Pulmonary function tests                                                      |              |        |        |        |        |        |                  | X       | X        |
| Hair nicotine (baby)*                                                         |              |        |        |        |        |        | X                | X       | X        |
| Buccal swab from mom and baby                                                 |              |        |        |        |        |        | x                | x       | x        |
| Respiratory Questionnaire ( at least quarterly beginning 1 month post partum) |              |        |        |        |        |        |                  | X       | X        |

|                             |  |   |  |   |  |   |  |   |   |
|-----------------------------|--|---|--|---|--|---|--|---|---|
| Ages & Stages Questionnaire |  |   |  |   |  |   |  |   | X |
| Patient reimbursement       |  | X |  | X |  | X |  | X | X |

1616

## APPENDIX C: Sample Consent Forms

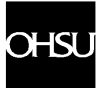

Oregon Health & Science University

Consent Form

IRB#: 6091

Protocol Approval Date: 4/10/2012

1617

1618

1619

### OREGON HEALTH & SCIENCE UNIVERSITY

1620

#### Consent Form

1621

**Title:**

Vitamin C to Decrease the Effects of Smoking in  
Pregnancy on Infant Lung Function: A Randomized Trial

1622

1623

1624

**Principal Investigator:**

Cynthia McEvoy, M.D. (503) 494-8122

1625

1626

**Sponsor:**

National Institutes of Health

1627

1628

**PURPOSE:**

1629

You have been invited to be in this research study because you are pregnant and are a smoker.

1630

The purpose of this study is to see how extra vitamin C affects a newborn infant's lungs in

1631

moms who smoked during pregnancy. We know that smoking during pregnancy can affect how

1632

a baby's lungs are formed. We have early data that extra vitamin C may improve the lung

1633

function tests in these babies, but we need to test this further. If you agree to join and do not

1634

withdraw later, you will be in this study for about 2 years. Your baby will be in the study from

1635

birth to one year old.

1636

This study includes a sub-study that collects blood for genetics research and future research.

1637

You will be asked to sign a separate form for the sub-study.

1638

This study group will include 330 pregnant women and we will continue to follow their babies

1639

through 1 year of age. Women from the Portland, Oregon area and from Indianapolis, Indiana

1640

can join the study. We expect about half of the subjects to be recruited in the Pacific Northwest.

1641

1642

1643 **PROCEDURES:**

1644 **Before Delivery (Prenatal)**

1645 Your participation in this study will be in addition to your routine prenatal clinic visits. As part of  
1646 the study you will be asked to do the following:

1647 *Enrollment*

1648 During the first visit, we will ask you questions about how much you smoke, smoking history,  
1649 your lifestyle, and your medical history. This will take about 20 minutes. If you have not yet had  
1650 an ultrasound, an ultrasound to tell your baby's due date will be ordered. For the first part of the  
1651 study (1 to 3 weeks), you will be given capsules to take that are placebos. A placebo is a  
1652 capsule that tastes, looks, and smells like the study capsule but has no real medicine in it. You  
1653 will be asked to take one capsule per day and then return to clinic in 1-3 weeks. The purpose of  
1654 this period is to determine if you can take this capsule regularly.

1655 We will give you prenatal vitamins throughout your pregnancy. We will ask that you take no  
1656 other vitamin or other vitamin supplements, including extra vitamin C, other than those we give  
1657 you or until you have talked about it with us. No changes in what you eat are necessary.

1658 *Assignment to Study Group*

1659 If you have been able to take your placebo capsules when you return at your second study visit,  
1660 you will be assigned by chance to get a vitamin C supplement or placebo for the rest of your  
1661 pregnancy. You will be asked to take one capsule each day with the prenatal vitamin. One  
1662 capsule of vitamin C contains 500 milligrams of vitamin C.

1663 Assignment to the study groups is done by chance (like the flip of a coin). You have an equal  
1664 chance of getting capsules that contain vitamin C or capsules that do not. Neither you nor the  
1665 clinic staff will know which capsules you are taking. The study is done this way because  
1666 sometimes knowing that you are getting the capsule with vitamin C can change the results of  
1667 the study. Also, sometimes people get side effects from placebos. Please ask the investigator  
1668 if you have any questions at all about this kind of study.

1669 *Further Clinic Visits During Pregnancy*

1670 You will meet with the study staff at each visit. You may also get reminder calls, texts, or emails  
1671 prior to the visits. We will do your study visit with your prenatal clinic visit whenever possible.  
1672 The following will occur at study visits:

- 1673
- We will ask that you bring left over study capsules in the original bottle. As needed, you  
1674 will get extra study capsules to take.
- 1675



- 1676
- 1677
- 1678
- 1679
- 1680
- 1681
- 1682
- 1683
- 1684
- 1685
- 1686
- 1687
- 1688
- 1689
- 1690
- 1691
- 1692
- 1693
- 1694
- 1695
- The study staff will review your smoking history at each visit and answer any questions or concerns you may have about the study. This will take about 10 minutes.
  - We will get samples of your urine for this study. This will be tested for a substance that may be related to smoking. We will also have you do an exhaled carbon monoxide test which is a simple breathing test where you blow into a tube and it measures the level of carbon monoxide in your lungs. Carbon monoxide is a gas that can build up in the body of smokers.
  - Near the start of the study, a blood sample (1-2 teaspoons) will be taken. This is taken at the same time you have blood work done as part of your routine care. One to two other blood samples (1-2 teaspoons each) will be done for the study during your pregnancy. Again, if at all possible, this will be done at the same time as other blood work that is part of your prenatal care. These blood samples will be tested for vitamin C levels so we will ask you not to have anything to eat for 6 hours before the blood is taken since this can affect the vitamin C level. A small sample of hair will be collected from you at the beginning of the study and near delivery., We will also collect these samples from you when your baby is 3 and 12 months of age and we will also have you do an exhaled carbon monoxide test at these times. The strands of hair will be cut, not pulled, from as close to the skin on the back of your head as possible. They will be used to test for the presence of nicotine use.

1696 **As often as possible during your regular ultrasound, several extra pictures will be done**

1697 **to do sensitive measures of blood flow in your umbilical artery and placenta. This will be**

1698 **done at OHSU and PHSW and will be done near the start of the study (it may be done**

1699 **twice if you join the study early in your pregnancy) and done again when you are closer**

1700 **to delivery. During the last ultrasound you will be asked to breathe 60% oxygen through**

1701 **a face mask for 5-10 minutes to see the effect of extra oxygen on the blood flow to your**

1702 **baby's lungs. This has not caused problems when done in other studies. You will not be**

1703 **charged for any extra ultrasound pictures done for this study.**

#### 1704 **Delivery**

1705 When you are in the hospital to deliver your baby it is usual care that you will not be allowed to

1706 eat food but may be allowed to drink fluids. If you would like to drink juices, we will offer an

1707 organic brand that does not have a lot of vitamin C in it (either naturally or added) since this

1708 may affect the levels of vitamin C that will be measured in the umbilical cord blood when your

1709 baby is born. The following things will be done for the study at delivery:

- 1710
- 1711
- 1712
- 1713
- 1714
- 1715
- 1716
- 1717
- Umbilical cord blood is usually collected for clinical care. When possible, about 1 teaspoon of this blood will be collected to measure levels of nicotine, cotinine (a substance that nicotine is changed into by the body), vitamin C and other substances such as proteins or other vitamins that may be affected by smoking and extra vitamin C.
  - Several small pieces of your placenta will be tested for substances showing vitamin C use/breakdown and your placenta will be weighed, measured, and looked at for signs of infection or decreased blood flow.

#### 1718 **After Delivery Until Baby is One Year Old**

1719

- At 3 and 12 months of age, a test of how your baby's lungs work will be done. At OHSU and PHSW, a test of how your baby's lungs work will also be done at about 48 hours of age. If this first test cannot be done before you and your baby go home, we will do it within the first month of age. The breathing tests will measure your baby's breathing and how his/her lungs work by using a mask that your baby will breathe through.
- During the breathing tests brief closures of the airway (lasting a fraction of a second) will be done. A vest will also be wrapped around your baby's chest for part of the test done at 3 and 12 months. During this part of the test, the front of the vest will be inflated and help your baby blow air out quickly. We measure the flow of air that your baby breathes out. For part of the test we will also give your baby several breaths before the vest inflation. Each lung function test takes about 15-20 minutes. We will tell you whether the test was within normal limits and send these results to your baby's doctor.
- We will not use any medication to make your baby sleepy for the lung function tests that are done while your baby is in the hospital after delivery. For the 3 and 12 month test, your baby will not be able to eat or drink for four hours before the test because we will need to give a syrup to make him/her sleepy. You will be asked to sign an extra form allowing us to give the syrup that will make your infant sleepy for about one hour. At the 3 and 12 month test we will also ask whether your baby has had any breathing problems since the last visit, whether they are on any medications, and if anyone living in the home smokes. These questions will take about 10 minutes.
- When possible (near delivery and at 3 and 12 months of age), we will get a small sample of hair from the back of your baby's head for testing for the study.
- We will contact you monthly by phone, email, text or in person until your baby is 12 months of age and ask how your baby's breathing has been. This will take about 10 minutes.

Your agreement to be in the study gives your permission for the research staff to look at your medical records for any health care you get during your pregnancy and delivery, and the medical records of your baby at delivery and through 12 months of age.

Please see the tables below, which go over your participation in the study.

### Maternal Data Collection Schedule

|                                 | Screening   | Consent, trial of placebo | Randomization | Monthly Visits thru Delivery | Delivery |
|---------------------------------|-------------|---------------------------|---------------|------------------------------|----------|
| Estimated pregnancy week ranges | 11 – 20 wks | 11 – 20 wks               | 13 – 22 wks   | 17 – 40 wks                  | 40 wks   |
| Medical history                 | X           |                           |               |                              |          |
| Monthly pill count and refill   |             | X                         | X             | X                            |          |

|                                                 |   |   |   |   |   |
|-------------------------------------------------|---|---|---|---|---|
| Watch for negative effects                      |   |   | X | X | X |
| Changes in health                               | X | X | X | X | X |
| Smoking Questionnaire                           | X | X | X | X | X |
| Urine sample *                                  |   |   | X | X | X |
| Hair sample                                     |   |   | X |   | X |
| Ultrasound for blood flow**                     |   |   |   | X |   |
| Blood samples *                                 |   |   | X | X | X |
| Amniotic fluid, Cord blood, placenta collection |   |   |   |   | X |

1750 \*Two levels obtained after randomization, evenly spaced as possible; \*\* may be done  
1751 twice during pregnancy at OHSU and PHS

1752 **Infant Data Collection Schedule**

|                             | Birth | Month 1and 2 | Month 3 | Month 4-11 | Month 12 |
|-----------------------------|-------|--------------|---------|------------|----------|
| Weight and length           | X     |              | X       |            | x        |
| Breathing Test *            | X     |              | X       |            | x        |
| Monthly breathing questions |       | X            | X       | X          | x        |
| Hair sample                 | X     |              | X       |            | x        |

1753 \* A syrup to make your baby sleepy will be given at the 3 and 12 month breathing  
1754 test

1755 If you agree to be in this study, to this study, there will be about 11 visits over about 18 months.  
1756 Most of these visits will be done with your routine prenatal care. These visits also include the  
1757 breathing test your baby will have at 3 and 12 months of age.

1758

1759 We may contact you after your child is one year of age to continue to ask questions about their  
1760 breathing.

1761 If you have any questions about this study now or in the future, contact Cynthia McEvoy, M.D.  
1762 (503) 494-8122.

1763 **RISKS AND DISCOMFORTS:**

1764 *Vitamin C Dose:* There are no documented risks of vitamin C supplementation in pregnant  
1765 women with doses of up to 1000 mg per day given during pregnancy. The vitamin C dose in this  
1766 study is 500 mg/day which is about half of the dose that has been used in other studies in  
1767 pregnancy. However, you may experience the discomfort of an upset stomach.

1768 *Lung Function Tests:* There are no known specific risks of the lung function testing. Your baby  
1769 may become restless during the lung function testing. If this happens your baby will be checked  
1770 by Dr. McEvoy or your baby's doctor and the test will be stopped if needed.

1771 *Blood Draws:* You may feel some pain when your blood is drawn. However when possible, all  
1772 blood draws for the study will be done at the same time that routine blood is drawn for your  
1773 normal prenatal care. There is a small chance the needle will cause bleeding, a bruise, or an  
1774 infection.

1775 *Hair Samples Collection:* There is no risk to you or your baby during the collection of hair  
1776 strands or nail clippings. The hairs will be cut, not pulled, and should cause no discomfort.

1777 *Questionnaires:* Some of the questions asked in the study may seem very personal or  
1778 embarrassing. You may refuse to answer any of the questions that you do not wish to answer.

1779 *Sedation:* *For the pulmonary function tests done at about 3 and 12 months of age, OHSU's*  
1780 *rules for helping an infant go to sleep will be followed. Chloral hydrate will be given by mouth. A*  
1781 *nurse or physician will give the medication and be in the room watching your child closely while*  
1782 *they are sleeping and until they are awake. We will watch how much oxygen is in his/her blood*  
1783 *while he/she is sleeping and when he/she wakes up. Your infant may become fussy before*  
1784 *going to sleep or after waking up. He / She may have some coughing with the medication, feel*  
1785 *sick to their stomach, have small decreases in the oxygen in their blood, have difficulty*  
1786 *breathing and feel light headed. You will be given a sheet that lists the things to watch out for*  
1787 *after the test and when you take him/her home.*

1788

1789 There may be other unexpected risks related to this study.

1790 **BENEFITS:**

1791 You and your baby may or may not personally benefit from being in this study. However, by  
1792 serving as a subject, you may help us learn how to benefit patients in the future.

1793 **ALTERNATIVES:**

1794 You may choose not to be in this study. You may also talk to your doctor about vitamin C and  
1795 you may also stop smoking.

1796 **CONFIDENTIALITY:**

1797 We will not use your name or your identity for publication or publicity purposes.

1798 Blood specimens or hair samples sent to laboratories outside of OHSU will be coded with a  
1799 unique identifier. The investigators at OHSU will be the only people with access to the code. No  
1800 other identifying information will be provided to those laboratories.

1801 Your research record may be reviewed and copied by all investigators listed on page one of this  
1802 consent form, others at OHSU who are participating in the conduct of this research protocol, the  
1803 sponsor (NIH), Oregon Clinical and Translational Research Institute (OCTRI), the National  
1804 Center for Research Resources, the OHSU Institutional Review Board, and the Office for  
1805 Human Research Protections.

1806 Under Oregon Law, suspected child or elder abuse must be reported to appropriate authorities.

1807 **COSTS:**

1808 The costs for newborn care that you would have even if you were not in this study will be billed  
1809 to you or your insurance company. You will be billed for any of these costs that your insurance  
1810 does not cover.

1811 The costs of the study will be covered by the research team or a sponsor of the study. This  
1812 includes, for example, the study capsule, extra blood draws, and extra pictures taking during  
1813 ultrasounds specifically for the study and any other tests or procedures that are done only for  
1814 the study. You will be reimbursed up to \$25 for each study visit that involves blood draws or  
1815 extra time for the study and up to \$100 for travel mileage, childcare, and inconvenience for  
1816 pulmonary function tests that require travel to the hospital for the study. You will be reimbursed  
1817 up to \$120 for completion of all 12 monthly breathing questions on your infants. You may  
1818 receive up to \$450 for the study as a whole for travel/time expenses depending on distance  
1819 traveled. The study coordinator will answer any questions you may have about these  
1820 reimbursements.

1821 **LIABILITY:**

1822

1823 If you believe you have been injured or harmed while participating in this research and require  
1824 immediate treatment, contact Cynthia McEvoy, M.D. (503) 494-8122.

1825 You have not waived your legal rights by signing this form. If you are harmed by the study  
1826 procedures, you will be treated. Oregon Health & Science University does not offer to pay for  
1827 the cost of the treatment. Any claim you make against Oregon Health & Science University may  
1828 be limited by the Oregon Tort Claims Act (ORS 30.260 through 30.300). If you have questions  
1829 on this subject, please call the OHSU Research Integrity Office at (503) 494-7887.

1830 It is not the policy of the federal funding agencies to compensate or provide medical treatment  
1831 for human subjects in federally funded studies.  
1832

1833 **PARTICIPATION:**

1834 Dr. McEvoy at 503- 494-8122 has offered to answer any other questions you may have about  
1835 this study. If you have any questions regarding your rights as a research subject, you may  
1836 contact the OHSU Research Integrity Office at (503) 494-7887.

1837 You do not have to join this or any research study. If you do join, and later you change your  
1838 mind, you may quit at any time. If you join and later quit smoking, you still may participate in the  
1839 study. If you refuse to join or withdraw early from the study, there will be no penalty or loss of  
1840 any benefits to which you are otherwise entitled. Your baby's doctors may withdraw your baby  
1841 from the study at any time if they believe it is in your baby's best interest.

1842 If in the future you decide you no longer want to participate in this research, we will either  
1843 destroy your samples or we will remove your name and any other identifiers from your samples  
1844 (making them anonymous), and we continue to use if for research.

1845 Your consent to participate in this study is voluntary. You may refuse to sign this consent form.  
1846 If you refuse to sign this consent form, your baby's health care and relationship with OHSU will  
1847 not be affected.

1848 Your health care provider may be one of the investigators of this research study, and as an  
1849 investigator is interested in both your baby's clinical welfare and in the conduct of this study.  
1850 Before entering this study or at any time during the research, you may ask for a second opinion  
1851 about your care from another doctor who is in no way involved with this project. This may  
1852 involve extra cost that you will have to pay. You do not have to be in any research study offered  
1853 by your physician.

1854 A description of this clinical trial will be available on <http://www.ClinicalTrials.gov>, as  
1855 required by U.S. law. This web site will not include information that can identify you. At  
1856 most, the web site will include a summary of the results. You can search this web site at  
1857 any time.

1858

1859

1860 **SIGNATURES:**

1861 Your signature below indicates that you have read the above and agree to participate in this  
1862 study. We will give you a copy of this consent form.

OREGON HEALTH & SCIENCE UNIVERSITY

INSTITUTIONAL REVIEW BOARD

PHONE NUMBER (503) 494-7887

CONSENT/AUTHORIZATION FORM APPROVAL DATE

July 11, 2012

Do not sign this form after the  
Expiration date of: 04-09-2013

1863

1864 \_\_\_\_\_

1865 Signature of Mother Date

1866

1867 \_\_\_\_\_

1868 Signature and Printed Name Date

1869 Of Person Obtaining Consent

1870 COPIES FOR: SUBJECT CHART

1871 INVESTIGATOR

1872 INFORMED CONSENT – MEDICAL STUDIES

1873 \_\_\_\_\_

1874 *Do not write below this line – for office use only*

1875

1876 Stamper Plate:

1877

**IRB#: 6091**

1878

**Protocol Approval Date:**

1879

04/10/2012

1880

**OREGON HEALTH & SCIENCE UNIVERSITY**

1881

Consent Form – Genetic Sub-study

1882

**Title:**

Vitamin C to Decrease the Effects of Smoking in

1883

Pregnancy on Infant Lung Function: A Randomized Trial

1884

**Principal Investigator:**

Cynthia McEvoy, M.D. (503) 494-8122

1885

**Sponsor:**

National Institutes of Health

1886

**PURPOSE:**

1887

You and your baby are participating in the above study and are invited to participate in this sub-study that will look at how genes are involved in the different ways nicotine affects different people. Genes are units of DNA – the chemical structure carrying your genetic information—that determine many human characteristics such as the color of your eyes, your height, and whether you are male or female.

1888

1889

1890

1891

1892

This study may help explain why some people smoke, why some people never smoke, and why some people who start smoking have great difficulty stopping. Looking at these genes may also help us tell which children born to smokers are more likely to get asthma. The blood samples provided will be analyzed to see if there are differences in the genes of people who smoke versus those who don't.

1893

1894

1895

1896

1897

If you agree, your blood, hair, urine, and placenta samples and your baby's blood, hair, and urine will also be stored indefinitely to be used for future research that might also include other genetics research.

1898

1899

1900

**PROCEDURES:**

1901

About 1 teaspoon of your blood will be collected, as often as possible, at the same time as a routine blood draw at one of your routine prenatal visits. About 1 teaspoon of blood will be taken at the time of delivery from the umbilical cord blood sample which is already being collected as part of the main study and small pieces of the placenta will be taken which is already collected as part of the main study. If we are unable to collect umbilical cord blood, we may ask to collect up to 1 teaspoon of blood from your infant when possible with another blood draw.

1902

1903

1904

1905

1906

1907

**SUBJECT ACCESS TO GENETIC INFORMATION:**

1908

The results of these studies will not be made available to you because the research is still in an early phase and the meaning of the results is unknown.

1909



1910

1911 **RISKS AND DISCOMFORTS:**

1912 This research involves genetic research. A Federal law, called the Genetic Information  
1913 Nondiscrimination Act (GINA), generally makes it illegal for health insurance companies, group  
1914 health plans, and most employers to discriminate against you based on your genetic  
1915 information. Be aware that this new Federal law does not protect you against genetic  
1916 discrimination by companies that sell life insurance, disability insurance, or long-term care  
1917 insurance.

1918 Although we have made every effort to protect your identity, there is a small risk of loss of  
1919 confidentiality. If the results of these studies of your genetic makeup were to be accidentally  
1920 released, it might be possible that the information we will gather about you as part of this study  
1921 could become available to an insurer or an employer, or a relative, or someone else outside the  
1922 study. Even though there are discrimination protections in both Oregon law and Federal law,  
1923 there is still a small chance that you could be harmed if a release occurred.

1924 Whenever possible, blood will be collected at the time of other blood draws so there will be no  
1925 additional pain.

1926 **BENEFITS:**

1927 You and your baby will not personally benefit from being in this study. However, by serving as a  
1928 subject, you may help us learn which children are most likely to smoke or get breathing  
1929 problems so that programs can be developed to help these children from getting these  
1930 problems.

1931 **ALTERNATIVES:**

1932 You may choose not to be in this study.

1933 **CONFIDENTIALITY AND PRIVACY OF YOUR PROTECTED HEALTH INFORMATION:**

1934 A code number will be assigned to you and your genetic information, as well as to information  
1935 about you and all personal identifiers will be removed from blood samples. Only the  
1936 investigators named on this consent form will be authorized to link the code number to you.  
1937 Other investigators who may receive samples of your blood for research will be given only the  
1938 code number which will not identify you.

1939 All other parties including employers, insurance companies, personal physicians, and relative  
1940 will be refused access to the information or to the samples, unless you provide written  
1941 permission, or unless we are required by law to do so.

1942 We will not use your name or your identity for publication or publicity purposes.

1943 Your research record may be reviewed and copied by all investigators listed on page one of this  
1944 form, others at OHSU who are participating in the conduct of this research protocol, the OHSU

1945 Institutional Review Board, the Oregon Clinical and Translational Research Institute (OCTRI),  
1946 the National Center for Research Resources (NCRR), and the Office for Human Research  
1947 Protections (OHRP) which is a part of the US Department of Health and Human Services.

1948 Under Oregon Law, suspected child or elder abuse must be reported to appropriate authorities.

1949 **COSTS:**

1950 There is no cost to you or your baby for participating in this research.

1951 **COMMERCIAL DEVELOPMENT:**

1952 By consenting to participate, you authorize the use of your samples for the research described  
1953 in the PURPOSE and PROCEDURES sections of this document. In addition, you acknowledge  
1954 that OHSU may make any lawful use of your samples, including, but not limited to, future  
1955 research studies, destroying them, or transferring them to a public or private entity.

1956 Samples obtained from you in this research may be used to make a discovery that could be  
1957 patented or licensed to a company. There are no plans to provide financial compensation to you  
1958 should this occur. However, should OHSU ever provide your samples to anyone else for  
1959 research or commercial use, it will do so in such a way to protect your privacy and confidentiality  
1960 as stated in the CONFIDENTIALITY section of this document. Further, you will have no  
1961 responsibility or liability for any use that may be made of your samples.

1962 **LIABILITY:**

1963 If you believe you have been injured or harmed while participating in this research and require  
1964 immediate treatment, contact Cynthia McEvoy, M.D. (503) 494-8122.

1965 You have not waived your legal rights by signing this form. If you are harmed by the study  
1966 procedures, you will be treated. Oregon Health & Science University does not offer to pay for  
1967 the cost of the treatment. Any claim you make against Oregon Health & Science University may  
1968 be limited by the Oregon Tort Claims Act (ORS 30.260 through 30.300). If you have questions  
1969 on this subject, please call the OHSU Research Integrity Office at (503) 494-7887.

1970 It is not the policy of the federal funding agencies to compensate or provide medical treatment  
1971 for human subjects in federally funded studies.

1972 Oregon Health & Science University is subject to the Oregon Genetic Privacy law (ORS 192.531  
1973 through ORS 192.549) and its requirements concerning confidentiality and the legal remedies  
1974 provided by that law for breach of its requirements. You have not waived your legal rights by  
1975 signing this form. For clarification on this subject, or if you have further questions, please call the  
1976 OHSU Research Integrity Office at (503) 494-7887.

1977  
1978

1979

1980

1981 **PARTICIPATION:**

1982

1983 If in the future you decide you no longer want to participate in this research, we will remove your  
1984 name and any other identifiers from your blood, but the material will not be destroyed and we  
1985 will continue to use it for research.

1986 Dr. McEvoy at 503- 494-8122 has offered to answer any other questions you may have about  
1987 this study. If you have any questions regarding your rights as a research subject, you may  
1988 contact the OHSU Research Integrity Office at (503) 494-7887.

1989 You do not have to join this or any research study. If you do join, and later change your mind,  
1990 you may quit at any time. If you decline to join or withdraw early from the study, there will be no  
1991 penalty or loss of any benefits to which you are otherwise entitled. If you withdraw early, neither  
1992 you nor your baby will not be expected to complete any further testing. You will be informed of  
1993 any new findings that may affect your decision to continue in the study.

1994 Your health care provider may be one of the investigators of this research study, and as an  
1995 investigator is interested in both your baby's clinical welfare and in the conduct of this study.  
1996 Before entering this study or at any time during the research, you may ask for a second opinion  
1997 about your care from another doctor who is in no way involved with this project. You do not have  
1998 to be in any research study offered by your physician.

1999 We will give you a copy of this form.

2000

2001

2002

2003

2004

2005

2006

2007

2008

2009

2010

2011

2012  
2013  
2014  
2015  
2016

**SIGNATURES:**

Your signature below indicates that you have read the foregoing and agree to participate in this study.

OREGON HEALTH & SCIENCE UNIVERSITY  
INSTITUTIONAL REVIEW BOARD  
PHONE NUMBER (503) 494-7887

CONSENT/AUTHORIZATION FORM APPROVAL DATE

**July 11, 2012**

Do not sign this form after the  
Expiration date of: 04-09-2013

2017  
2018  
2019  
2020  
2021  
2022  
2023  
2024  
2025  
2026  
2027

\_\_\_\_\_

Signature of Mother

\_\_\_\_\_

Date

\_\_\_\_\_

Person Obtaining Consent

\_\_\_\_\_

Date

COPIES FOR:  
INVESTIGATOR

SUBJECT

CHART

INFORMED CONSENT – MEDICAL STUDIES

\_\_\_\_\_

2028 *Do not write below this line – for office use only*

2029

2030 Stamper Plate:
