# Supplementary material
Source: PubMed Central journal article supplement (PMC9679962)
Supplement: jamapediatr-e224401-s002.pdf [file jamapediatr-e224401-s002.pdf]

1  
2 **VCSIP2:CCC-Lead Application**

3 Vitamin C to Decrease the Effects of Smoking in Pregnancy on Infant

4 Lung Function (VCSIP):

5 Follow-up of a Randomized Trial

6  
7  
8 Funded by the National Heart, Lung & Blood Institute

9 National Institutes of Health

10 Bethesda, Maryland

11  
12 Prepared by the Clinical and Data Coordinating Center

13 Oregon Health & Science University

14 Departments of Pediatrics and Clinical Epidemiology & Medical Informatics

15 3181 SW Sam Jackson Park Rd.

16 Portland, OR 97239  
17  
18  
19  
20  
21  
22  
23  
24  
25  
26  
27

## TABLE OF CONTENTS

|    |                                                      |    |
|----|------------------------------------------------------|----|
| 29 | 1. TITLE.....                                        | 4  |
| 30 | 1.1 PROTOCOL ABSTRACT .....                          | 4  |
| 31 | 2. OBJECTIVES.....                                   | 4  |
| 32 | 2.1 SPECIFIC AIM1.....                               | 4  |
| 33 | 2.2 SPECIFIC AIM2.....                               | 4  |
| 34 | 2.3 PURPOSE OF PROTOCOL.....                         | 4  |
| 35 | 3. BACKGROUND.....                                   | 5  |
| 36 | 3.1 INTRODUCTION AND SIGNIFICANCE .....              | 5  |
| 37 | 3.2 BACKGROUND.....                                  | 5  |
| 38 | 3.2.1 EPIDEMIOLOGY AND PFTs .....                    | 5  |
| 39 | 3.2.2 PRIMATE STUDY .....                            | 6  |
| 40 | 3.2.3 Results of first vitamin C study.....          | 6  |
| 41 | 3.2.4 Genotype and Effects of Maternal Smoking ..... | 7  |
| 42 | 3.3 RATIONALE FOR FOLLOW-UP .....                    | 7  |
| 43 | 4. STUDY DESIGN .....                                | 8  |
| 44 | 4.1 DESIGN FOR VCSIP-ECHO .....                      | 8  |
| 45 | 4.2 SUMMARY OF DESIGNS OF VCSIP AND VCSIP2.....      | 8  |
| 46 | 4.2.1 General Background.....                        | 8  |
| 47 | 4.2.2 Eligibility Criteria .....                     | 8  |
| 48 | 4.2.3 Screening, Recruitment and Enrollment.....     | 8  |
| 49 | 4.2.4 Randomization and Study through Delivery.....  | 8  |
| 50 | 4.2.5 Follow-up through 12 Months .....              | 9  |
| 51 | 5. STUDY POPULATION .....                            | 9  |
| 52 | 5.1 NUMBER OF SUBJECTS .....                         | 9  |
| 53 | 5.1.2 Retention Strategies .....                     | 10 |
| 54 | 5.2 Inclusion and Exclusion Criteria.....            | 10 |
| 55 | 5.3 Vulnerable Populations.....                      | 10 |
| 56 | 5.4 Settings.....                                    | 10 |
| 57 | 5.5. Recruitment Methods.....                        | 11 |
| 58 | 5.6 Consent Process.....                             | 11 |
| 59 | 6. STUDY PROCEDURES AND METHODS .....                | 12 |
| 60 | 6.1 OVERVIEW.....                                    | 12 |
| 61 | 6.2 RESPIRATORY QUESTIONNAIRE .....                  | 12 |
| 62 | 6.3 CHILD ANTHROPOMETRICS AND BLOOD PRESSURE .....   | 13 |
| 63 | 6.4 HAIR NICOTINE .....                              | 13 |
| 64 | 6.5 EXHALED CARBON MONOXIDE .....                    | 13 |
| 65 | 6.6 BUCCAL SWABS .....                               | 13 |
| 66 | 6.7 SMOKING CESSATION COUNSELING .....               | 13 |
| 67 | 6.8 BLOOD FOR EPIGENETICS .....                      | 13 |
| 68 | 6.9 PULMONARY FUNCTION TESTING .....                 | 14 |
| 69 | 6.10 QUALITY CONTROL OF PFTs .....                   | 14 |
| 70 | 7. DATA AND SPECIMENS.....                           | 15 |
| 71 | 7.1 HANDLING OF SPECIMENS.....                       | 15 |
| 72 | 7.2 HANDLING OF DATA .....                           | 15 |
| 73 | 7.2.1 Data Center.....                               | 15 |
| 74 | 7.2.2 Data Management and Quality Assurance .....    | 15 |
| 75 | 7.2.3 REDCap.....                                    | 15 |
| 76 | 7.2.4 Data Forms, Entry, and Cleaning.....           | 16 |

|     |                                                                            |    |
|-----|----------------------------------------------------------------------------|----|
| 77  | 7.2.5 Data Access.....                                                     | 17 |
| 78  | 7.2.6 Manual of Operations and Training.....                               | 17 |
| 79  | 7.2.7 Site Monitoring.....                                                 | 17 |
| 80  | 7.3 SHARING RESULTS WITH SUBJECT.....                                      | 17 |
| 81  | 7.4 DATA AND SPECIMEN BANKING.....                                         | 17 |
| 82  | 8. DATA ANALYSIS.....                                                      | 18 |
| 83  | 8.1 PRIMARY AIM.....                                                       | 18 |
| 84  | 8.2 SECONDARY AIM OF WHEEZING.....                                         | 18 |
| 85  | 8.4 MISSING DATA.....                                                      | 19 |
| 86  | 8.6 TIMELINE.....                                                          | 19 |
| 87  | 9. PRIVACY, CONFIDENTIALITY, AND DATA SECURITY.....                        | 19 |
| 88  | 10. PROVISION TO MONITOR PATIENT SAFETY.....                               | 19 |
| 89  | 11. RISKS AND BENEFITS.....                                                | 20 |
| 90  | 11.1 MINIMAL RISKS.....                                                    | 21 |
| 91  | 11.2 POTENTIAL BENEFIT.....                                                | 21 |
| 92  | 12. RESOURCES AVAILABLE.....                                               | 21 |
| 93  | 13. DRUGS AND DEVICES- N/A.....                                            | 21 |
| 94  | 14. MULTI-SITE COORDINATION.....                                           | 21 |
| 95  | REFERENCES.....                                                            | 22 |
| 96  |                                                                            |    |
| 97  | TABLES:                                                                    |    |
| 98  | TABLE 1. RESPIRATORY OUTCOMES IN RANDOMIZED INFANTS THROUGH ONE YEAR OLD.. | 6  |
| 99  | TABLE 2. SUMMARY OF QUESTIONNAIRES OR PROCEDURES.....                      | 10 |
| 100 |                                                                            |    |
| 101 | FIGURES:                                                                   |    |
| 102 | FIGURE 1. FORCED EXPIRATORY FLOWS IN NON-HUMAN PRIMATES.....               | 6  |
| 103 | FIGURE 2. MATERNAL GENOTYPE MODULATE OFFSPRING PFT.....                    | 7  |
| 104 | FIGURE 3. TRIAL PROFILE FOR CONTINUED FOLLOW-UP.....                       | 9  |
| 105 | FIGURE 4. MULTI-STAGE DATA VALIDATION.....                                 | 16 |
| 106 |                                                                            |    |
| 107 |                                                                            |    |
| 108 |                                                                            |    |
| 109 |                                                                            |    |
| 110 |                                                                            |    |
| 111 |                                                                            |    |
| 112 |                                                                            |    |
| 113 |                                                                            |    |
| 114 |                                                                            |    |
| 115 |                                                                            |    |
| 116 |                                                                            |    |
| 117 |                                                                            |    |
| 118 |                                                                            |    |
| 119 |                                                                            |    |
| 120 |                                                                            |    |
| 121 |                                                                            |    |
| 122 |                                                                            |    |
| 123 |                                                                            |    |
| 124 |                                                                            |    |
| 125 |                                                                            |    |
| 126 |                                                                            |    |

127 **1. Protocol Title: VCSIP2:CCC-Lead Application**  
128 Vitamin C to Decrease the Effects of Smoking in Pregnancy on Infant Lung Function (VCSIP):  
129 Follow-up of a Randomized Trial  
130

### 131 **1.1 Protocol Abstract** 132

133 Despite strong anti-smoking efforts, at least 12% of American women do not quit smoking when  
134 pregnant, resulting in >450,000 smoke-exposed infants born yearly.<sup>1</sup> Maternal smoking during  
135 pregnancy adversely affects lung development as seen by lifelong decreases in pulmonary function and  
136 increased risk of asthma.<sup>2:3</sup> with annual health care costs exceeding 1 billion dollars per year.<sup>4</sup> In a  
137 randomized controlled trial (RCT) published in *JAMA*,<sup>5</sup> we have provided evidence that vitamin C  
138 supplementation (500 mg daily during pregnancy) ameliorates the effects of maternal smoking during  
139 pregnancy on offspring lung function and decreased the incidence of wheeze by 48% through 1 year of  
140 age. We are currently completing a second RCT of vitamin C supplementation in pregnant smokers  
141 (NCT01723696 ["Vitamin C to Decrease Effects of Smoking in Pregnancy on Infant Lung Function"] )  
142 which has more robust measures of pulmonary outcomes through 12 months of age in the offspring.  
143 This minimal risk follow-up protocol will study the offspring from the current RCT. This will allow us to  
144 study the duration of the protection vitamin C provides in the face of in-utero smoke, the relationship  
145 between PFTs and the development of recurrent wheeze and/or asthma.  
146

### 147 **2. Objectives/ Scientific Aims** 148

149 **2.1 Specific Aim 1 (Primary Outcome): The primary aim of this study is to demonstrate improved**  
150 **pulmonary function at 5 years of age in the offspring of pregnant smokers randomized to**  
151 **vitamin C (500 mg/day) versus placebo.** We hypothesize that vitamin C supplementation in  
152 pregnancy will block the adverse effects of maternal smoking on offspring pulmonary function  
153 measured at 5 years of age by spirometry. Impulse oscillometry (IOS) will also be used at 3-5 years of  
154 age to assess pulmonary function.  
155

156 **2.2 Specific Aim 2 (Secondary Outcome): The secondary aim of this study is to demonstrate a**  
157 **decreased incidence of wheeze at 5 years of age in offspring of pregnant smokers randomized**  
158 **to vitamin C (500 mg/day) versus placebo.** We hypothesize that vitamin C supplementation during  
159 pregnancy will decrease the incidence of wheeze at 5 years of age in offspring of smokers. Respiratory  
160 health will be assessed by quarterly validated respiratory questionnaires and clinician report.  
161  
162

### 163 **2.3 Purpose of the Study Protocol** 164

165 This protocol serves as a road map for the execution of the study "**VCSIP2:CCC-Lead Application**  
166 "**Vitamin C to Decrease the Effects of Smoking in Pregnancy on Infant Lung Function (VCSIP):**  
167 **Follow-up of a Randomized Trial**". It will be reviewed by the Study Clinical Center (CCC) the Study  
168 Data Center (DCC), and Safety Monitoring Board (DSMB) appointed by the NHLBI. Any significant  
169 changes to the protocol during the study require the approval of the CCC, DCC, the NHLBI, and the  
170 DSMB. We are requesting that the Oregon Health & Science University (OHSU) IRB provides  
171 oversight of this minimal risk protocol to the IRBs at Indiana University (IU) and the PeaceHealth  
172 System IRB of PHSW. This will be done via signed authorization forms between OHSU and the  
173 respective IRBs.  
174

175  
176 A manual of operating procedures (MOP) will supplement the protocol and includes detailed information  
177 on the execution of the study and all procedures used.

178 **3. Background**

179  
180 **3.1 Introduction and Significance**

181  
182 Smoking during pregnancy remains a large public health issue and **more than 50% of smokers who**  
183 **become pregnant continue to smoke** despite the Surgeon General’s warning of the associated  
184 health problems for over 40 years.<sup>6;7</sup> Newborns of smokers have decreased pulmonary function when  
185 measured after delivery and before exposure to postnatal smoke, confirming the importance of in utero  
186 exposure. Decreased pulmonary function early in life is associated with increased respiratory illnesses  
187 early in life, and maternal smoking during pregnancy is a major contributor to these adverse respiratory  
188 outcomes.<sup>8-11</sup> Therefore, it is critical to develop early life strategies to maximize lung growth and  
189 development. Cohort studies have found that the increase in these adverse respiratory outcomes  
190 related to maternal smoking during pregnancy track into childhood and adulthood.<sup>3;12</sup>

191  
192 **3.2 Background Studies**

193  
194 **3.2.1. Epidemiology of Smoking in Pregnancy and Offspring Pulmonary Function Tests (PFTs).**

195  
196 Smoking during pregnancy is the largest preventable cause of low birth weight, prematurity and  
197 perinatal mortality.<sup>13;14</sup> Maternal smoking during pregnancy is also the largest preventable cause of  
198 childhood respiratory illness, and children whose mothers smoked during pregnancy show lifetime  
199 decreases in pulmonary function and increased respiratory illnesses and asthma.<sup>2;3;15</sup> Maternal smoking  
200 is estimated to cause 10% of direct medical expenditures in the first year of life<sup>16</sup> and Stoddard and  
201 Grey<sup>4</sup> estimated that approximately 20% of expenditures for childhood respiratory illness are caused by  
202 maternal smoking amounting to over \$1 billion annually in current health care dollars.

203  
204 Multiple studies have shown an increased lower respiratory illness in infants born of mothers who  
205 smoke.<sup>8;9;17;18</sup> There is also a direct link between the clearly documented decreases in indices of  
206 offspring pulmonary function caused by maternal smoking during pregnancy and increased rates of  
207 respiratory illness.<sup>19-26</sup> A prospective study of offspring of pregnant smokers with a 21 year follow up  
208 has now documented persistent decreases in forced expiratory flows to 21 years of age in males.<sup>3</sup> In  
209 turn, decreased pulmonary function in infants correlates with increased rates of respiratory illness.<sup>27-34</sup>  
210 Critically, results from the multiple cohorts have now definitively shown that children with lower  
211 pulmonary function continue to track at lower percentiles of pulmonary function throughout life, putting  
212 them at **increased risk for developing COPD as adults.**<sup>34-39</sup>

213  
214 Given the above, the obvious question is: why can’t pregnant women stop smoking to avoid the  
215 associated morbidities in their offspring. The reality is that smoking is a unique morbidity in that it is  
216 addictive, heavily advertised<sup>40-42</sup> and as discussed above, certain genotypes significantly increase the  
217 likelihood of nicotine addiction and failure to quit.<sup>43-45</sup> Teen pregnancy, low income, low education, and  
218 living with a smoker are important factors increasing the odds of smoking during pregnancy.<sup>46-48</sup>  
219 Therefore, infants are victimized through no fault of their own by the addiction of their mothers caused  
220 in part by socioeconomic class, advertising, and genetics. Given nicotine’s addictive nature, the low  
221 socio-economics of this population, and the constant advertising by tobacco companies, smoking  
222 during pregnancy will continue to adversely affect millions of babies worldwide. CDC statistics show  
223 that decreases in smoking rates have plateaued<sup>49</sup> and the rates have increased in recent years for  
224 teenagers.<sup>25</sup> The statistic that delineates the magnitude of the problem, is that multiple studies have  
225 shown, that upon learning of pregnancy, approximately 50% of smokers will immediately quit; the other  
226 50% will continue to smoke no matter the intervention. This unfortunate reality makes finding ways to  
227 lessen the impact of smoking during pregnancy of vital importance.

228

229 **3.2.2 Maternal Vitamin C Supplementation Prevents the Effects of Prenatal Nicotine Exposure on**  
 230 **Newborn Rhesus Monkey PFTs.**

231

232 There is strong support for the continuing success and follow-up study of the VCSIP ECHO cohort.  
 233 Data from preclinical work in primates from Dr. Spindel's laboratory, demonstrated that the major  
 234 effects of in utero smoke are caused by nicotine crossing the placenta to interact with nicotinic  
 235 receptors in developing lung airways and vasculature.<sup>50</sup> This leads to altered patterns of lung growth /  
 236 development and hence altered pulmonary function at birth.<sup>51</sup> Spindel then showed that supplemental  
 237 vitamin C blocked the effects of in utero nicotine exposure on newborn monkey lung function (Figure

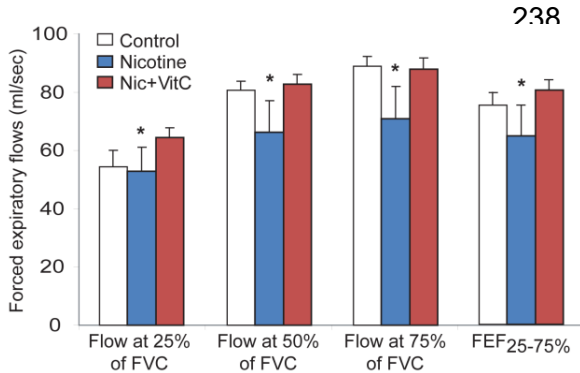

238

249

1).<sup>52</sup> This is consistent with studies showing that a primary mediator of smoking-induced oxidant injury is nicotine<sup>53-56</sup> and the multiple studies that show better pulmonary function correlating with increased vitamin C intake<sup>57:58</sup>. The results (Figure 1) are almost identical to the effects of maternal smoking during pregnancy on infant PFTs. These data provided the basis for VCSIP1 and VCSIP2.

**Figure 1.** Forced expiratory flows in animals treated as shown (Mean ± SEM). \**p*<.05 for overall comparison of Nicotine-treated group to control and nicotine + vitamin C-treated groups by MANOVA. FEF<sub>25%-75%</sub> = the average flow between 25% and 75% of forced expired volume. N= 20<sup>52</sup>

250

251

252 **3.2.3 Maternal Vitamin C Supplementation Improved Newborn Infant PFTs and Decreased**  
 253 **Wheeze through One Year of Age**

254

255 The likely success of our current study is strongly supported by our exciting data from VCSIP1 which  
 256 was published in JAMA. In this study,<sup>5</sup> 159 pregnant smokers were randomized to vitamin C (500  
 257 mg/day) versus placebo. The offspring born to pregnant smokers randomized to vitamin C had  
 258 significant improvements in newborn PFTs with significant increases in the time to peak tidal expiratory  
 259 flow to expiratory time (TPTEF:TE) and respiratory compliance per kilogram (Crs/kg).

260

261 Clinical respiratory follow-up was obtained on 92% of the patients and infants delivered to pregnant  
 262 smokers who received supplemental vitamin C importantly had a **48% decrease in the incidence of**  
 263 **wheeze** through 1 year of age (Table 1). Fewer patients in the vitamin C group required medications in  
 264 the first year of life for wheezing versus those randomized to placebo.

265

266

**Table 1. Respiratory Outcomes in Randomized Infants through One Year of Age**

|                             | Newborns of non-smokers (n=76) | Newborns of placebo-treated smokers (n=83) | Newborns of vitamin C-treated smokers (n=76) | P value for treatment groups* | 95% CI for difference in means in treated groups |
|-----------------------------|--------------------------------|--------------------------------------------|----------------------------------------------|-------------------------------|--------------------------------------------------|
| Incidence of wheeze (%)     | 19 (27%)                       | 31 (40%)                                   | 15 (21%)                                     | 0.019                         | 0.53 (0.32, 0.90)                                |
| Medication for wheezing (%) | 7 (10%)                        | 17 (22%)                                   | 9 (13%)                                      | 0.14                          | 0.58 (0.28, 1.20)                                |

267 \*Adjusted p value for vitamin C versus placebo based on binomial regression adjusting for  
 268 randomization.

269

270 The above published data from the VCSIP1 trial<sup>5</sup> showed that vitamin C supplementation reversed the  
 271 adverse effects of maternal smoking on infant pulmonary function and also suggests that vitamin C will

272 prevent the smoking-induced increase in offspring wheezing. Thus our preliminary data supports a  
273 likely positive result for continuing to study our VCSIP1 and VCSIP2 cohorts.

274  
275 **3.2.4 Genotype Modifies Infant Susceptibility to Effects of Smoking.**  
276

277 The importance of our study is supported by the multiple implications for our findings. Data published  
278 within our JAMA article<sup>5</sup> showed a significant interaction between the genotype for rs16969968 (the  $\alpha 5$   
279 nicotinic acetylcholine receptor (nAChR) structural polymorphism that has the strongest link to lung  
280 disease<sup>59</sup>) and altered offspring pulmonary function (Figure 2). These results add to the growing  
281 literature linking the effects of smoking on fetal development directly to nicotinic receptors which also  
282 raises concerns about the effects of e-cigarette usage during pregnancy. We found a significant  
283 interaction ( $p=0.0006$ ) between genotype and treatment group, indicating that the effect of vitamin C

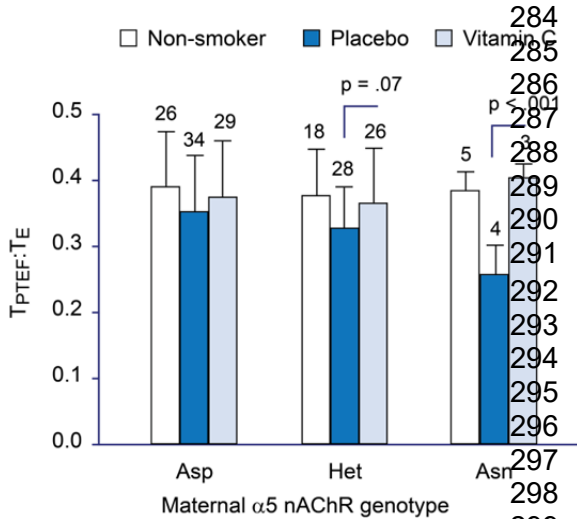

284 treatment depended on genotype. Although the sample  
285 size for smoking mothers homozygous for the risk  
286 allele was small, infants from these mothers showed  
287 the biggest decrease in TPTEF:TE ( $p<0.0001$ ) and this  
288 decrease was reversed by vitamin C supplementation.  
289 This finding emphasizes the power of a centralized  
290 approach to SNP analysis of prenatal and birth cohorts  
291 that is likely to come from the ECHO project.

292 **Figure 2.** Maternal  $\alpha 5$  nAChR genotype (rs16969968)  
293 modulates the effect of maternal smoking during  
294 pregnancy on offspring pulmonary function. Infants  
295 whose mothers were homozygous for the risk allele in  
296 which amino acid 398 of the  $\alpha 5$  nAChR is changed  
297 from Asp to Asn showed the largest decrease in  
298 TPTEF:TE comparing placebo to vitamin C treatment.  
299 Asp = mothers homozygous for non risk allele

300 (Asp/Asp), Het = heterozygotes (Asp/Asn), Asn = mothers homozygous for risk allele (Asn/Asn).

301  
302 **3.3 Rationale for the Follow-up of the Current Cohort**

303 There is growing data that an individual continues to track along the same pulmonary function  
304 percentile that is established early in life. Given that in-utero smoke exposure adversely affects the  
305 pulmonary function of the offspring, the long-term health of children whose mothers smoke in  
306 pregnancy will likely be compromised with increased wheeze, asthma, and respiratory illness. In our  
307 earlier work, we demonstrated that vitamin C protects lung development as measured by pulmonary  
308 function tests early in life, and may reduce the incidence of early wheeze. This proposed study is  
309 innovative as we will determine if the trajectory of lung development as measured through pulmonary  
310 function testing and the clinical outcome of children as measured by wheezing and respiratory illness  
311 burden is improved in children at 5 years old whose mother's received a vitamin C supplement during  
312 pregnancy. **If successful, vitamin C supplementation to pregnant smokers will be a safe,**  
313 **inexpensive and simple measure that will have great public health significance in improving**  
314 **respiratory health in the US as well as worldwide.**

315  
316 While all mothers should be counseled for smoking cessation in pregnancy, the reality is that some  
317 mothers are unable or unwilling to quit smoking and their children may be affected throughout their  
318 lives. If this study is successful, this simple approach may alter the respiratory health of these children,  
319 and potentially their later health as adults. In addition, this study is innovative as we will expand our  
320 unique biorepository of maternal, placental, and offspring blood, tissue and genetic samples that is  
321 coupled with prospective data collected on lifestyle, demographics, maternal history, and childhood

322 health and exposures. This will allow investigators to answer important scientific questions about the  
323 mechanisms by which exposure to cigarette smoke and vitamin C supplementation has life-long effects  
324 on respiratory function. The diligent follow-up of mother-child pairs in this study will create a highly  
325 important resource for studying the developmental origins of lung health and disease.

## 326 327 **4. Study Design**

### 328 329 **4.1 Study Design Summary for the Follow-up of the Current Cohort**

330  
331 This study is the prospective follow-up of offspring from the current RCT of pregnant smokers  
332 randomized to supplemental vitamin C (500 mg/day) versus placebo to follow the respiratory outcomes  
333 of the offspring at 5 years of age. The ongoing study is only funded to follow patients to 12 months of  
334 age although we have kept updated contact information on those more than 12 months old. The  
335 primary outcome for this proposal is pulmonary function tests at 5 years and the secondary outcome is  
336 recurrent wheeze at 5 years of age. Children will continue to be followed for up to 5 years, regardless  
337 of age at time of study entry. We have excellent recruitment and retention rates and project that 232  
338 children will enter this continuation and assuming a 10% cohort loss to 5 years, there will be 208  
339 children (104 per arm) for the analysis. **Of note, we have met the NIH timeline and milestone**  
340 **accrual plan throughout the study and have kept dropouts to a minimum, pointing to the**  
341 **success of our efforts used to retain study subjects.**

### 342 343 **4.2 Summary of Procedures of Current Vitamin C Study**

#### 344 345 **4.2.1 General Background**

346 Recruitment of the pregnant smokers and their offspring is finished for the current RCT, but we  
347 summarize it here as context for the continuation of the study. The primary aim of the study was to  
348 demonstrate improved pulmonary function tests (PFTs) at 3 months of age. The secondary aims were  
349 to demonstrate improved PFTs and decreased wheeze at 12 months of age.(Figure 3). See IRB for full  
350 protocol.

#### 351 352 **4.2.2. Eligibility Criteria**

353 To qualify for the study at randomization, pregnant cigarette smokers had to be  $\geq 15$  years old, with a  
354 singleton gestation, gestational age between  $13^0/7$  and  $22^6/7$  weeks, receiving care at clinics near the  
355 study sites, unable to quit smoking, English speaking. Important exclusion criteria: multiple gestation,  
356 fetal anomalies, illicit drug use, unstable communication, failure of medication adherence period.

#### 357 358 **4.2.3. Screening, Recruitment, and Enrollment**

359 There was a single research coordinator at each site for all patient interactions. Pregnant smokers were  
360 recruited by referrals from providers, self-referral from advertisements, and hospital medical record  
361 queries. Eligible patients were approached at their prenatal visit about participation in the study, and  
362 the consent was reviewed in detail. **Smoking cessation and education of the adverse effects of**  
363 **smoking on the fetus occurred at consent and each prenatal visit.**

#### 364 365 **4.2.4 Randomization and Study through Delivery**

366 Randomization was done through the study's data coordinating center (DCC) and the OHSU research  
367 pharmacy. The vitamin C and placebo medications were compounded in identical capsules at an  
368 outside site and distributed through the respective research pharmacies of OHSU and Indiana  
369 University. **Blinding has been maintained for the patients, all clinical study personnel, and**  
370 **primary care providers for both studies at all sites.** Maternal fasting ascorbic acid levels, urine and  
371 hair samples and exhaled carbon monoxide were collected prior to randomization and at two other  
372 prenatal visits. Patients were met at monthly prenatal visit and pill counts, smoking, and medical history



373 were documented. Blood, placenta samples, buccal swabs, maternal and newborn hair, and delivery  
374 history were collected at delivery.

375  
376 **4.2.5. Follow-up from Delivery through 12 Months**

377 A standardized respiratory questionnaire for the offspring was done at monthly for the current study and  
378 PFTs at 3 and 12 months of age. At the PFTs, maternal and infant hair for nicotine, infant buccal  
379 swabs, and maternal exhaled carbon monoxide were collected. The same research coordinator  
380 maintained consistent patient contact. At the 12 month PFTs, the potential of follow-up through 5 years  
381 of age was discussed in person.  
382  
383

384 **Figure 3. Trial profile for the continued follow-up of offspring**

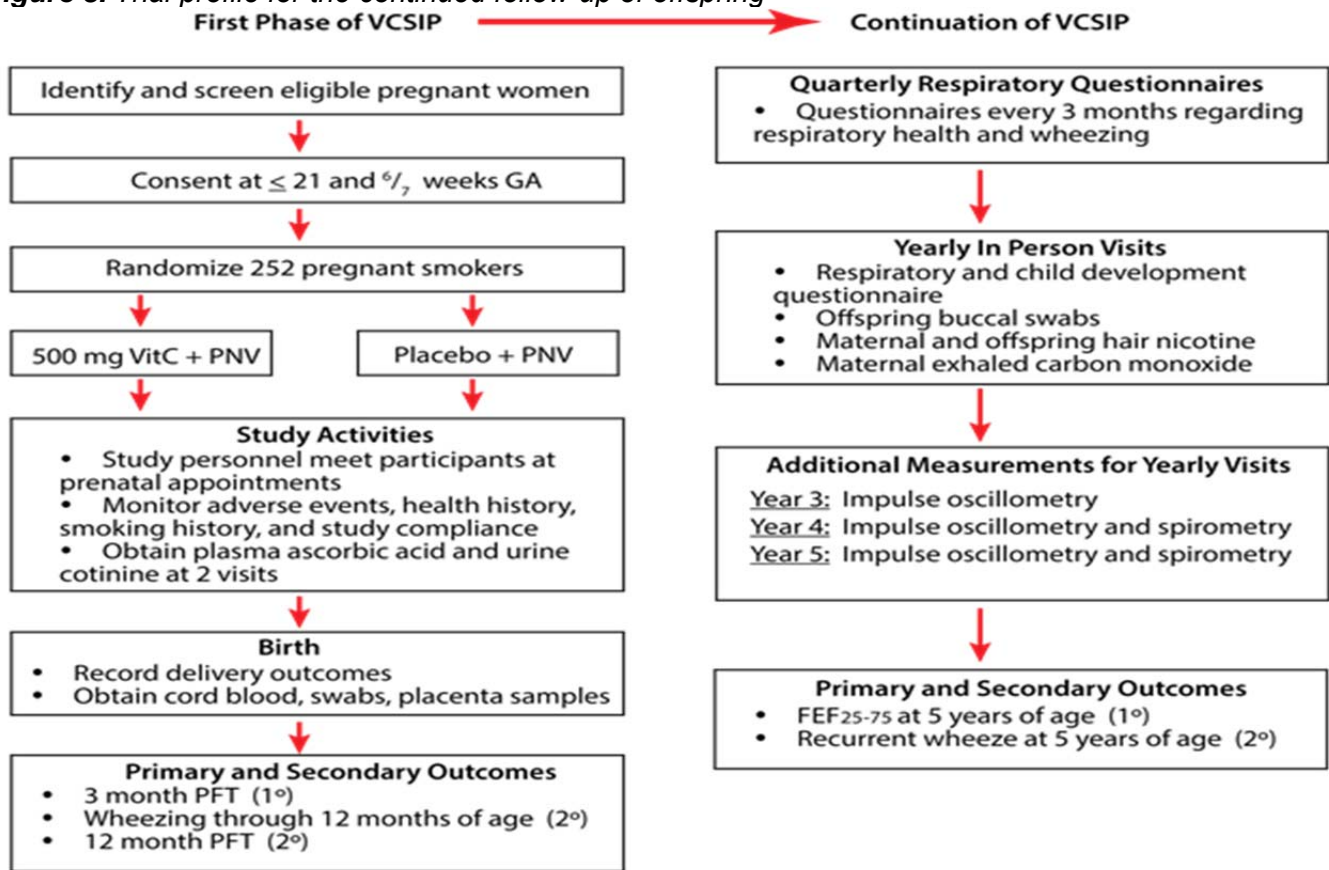

385  
386

387 **5. Study Population of Current Vitamin C Study**

388

389 **5.1 Number of Subjects**

390

391 The ongoing RCT is being conducted in the Pacific Northwest and in Indianapolis, Indiana. Pregnant  
392 smokers were recruited at obstetric clinics delivering at OHSU, PeaceHealth Southwest Washington  
393 Medical Center in Vancouver, Washington or Indiana University in Indianapolis, Indiana. Recruitment  
394 and randomization began in December, 2012 and ended in May, 2015 and exceeded the original NIH  
395 accrual plan and timeline. 333 pregnant smokers were consented and 252 randomized. Cohort  
396 retention from delivery through the 12 month follow-up has been excellent. We have excellent  
397 recruitment and retention rates and project that 232 children of smokers (65% of patients will be in the  
398 Pacific Northwest and 35% in Indianapolis) will enter into the follow-up phase.

399 **5.1.2 Retention Strategies.**

400

401 The clinical centers will maintain their respective cohorts of mothers and their children through  
402 application of novel and evidenced based retention techniques. Techniques include regular multimodal  
403 contact such as phone calls, text messages, and emails, social media private messaging, birthday  
404 cards and pre-arranged check-ins at mother or child’s appointments. In instances where contact proves  
405 difficult, alternative retention strategies are: searching databases for updated contact information;  
406 calling at different times of the day and on weekends; and contacting close friends and/or relatives who  
407 were listed by the participant as back-up contacts or the participant’s work if permission was obtained  
408 during consent. Additionally, we successfully branded our study with three logos placed on items such  
409 as magnets with our contact information, tote-bags for the mothers, onesies for the infants, and  
410 lanyards for hospital and clinic staff (see appendix). These items have proven priceless in enhancing  
411 rapport with participants and recruitment site staff by increasing excitement around the study and  
412 reminding participants and clinicians of their commitment. There is a website <http://vcsip.org> and a  
413 Facebook page <https://www.facebook.com/Vcsip.ohsu> with publicly available information as well as  
414 protected pages for investigator and participant communication. There will also be a yearly retreat to  
415 enhance communication, problem solving for cohort retention, and capturing outcomes data.

416

417 **5.2 Inclusion and Exclusion Criteria for Follow-up**

418

419 5.2.1 Inclusion criteria for prospective follow-up:

420 1. Women and their offspring randomized to vitamin C versus placebo during pregnancy as well  
421 as pregnant nonsmokers and their offspring enrolled as the reference group in the current RCT.

422

423 5.2.2 Exclusion criteria for prospective follow-up:

424 1. Patients specifically withdrawing consent.

425

426 **5.3. Vulnerable Populations**

427 This is a follow-up of children born to pregnant smokers randomized to supplemental vitamin C versus  
428 placebo in the current RCT. Continued follow-up of these children is critical to determine if maternal  
429 vitamin C supplementation during pregnancy leads to prolonged improvements on offspring’s  
430 pulmonary function tests (PFTs) and respiratory health. This will allow us to study the duration of the  
431 protection vitamin C provides in the face of in-utero smoke, the relationship between PFTs and the  
432 development of recurrent wheeze and/or asthma.

433

434 **5.4. Settings**

435

436 The research settings for this follow-up will be the same sites that randomized pregnant smokers and  
437 enrolled pregnant nonsmokers i.e. (metropolitan Portland, Oregon (PNW) including OHSU and  
438 PeaceHealth Southwest Medical Center (PHSW) and Riley Children’s Hospital in Indianapolis, Indiana).  
439 Both sites demonstrate track records of successful clinical research in pregnancy and infant/ childhood  
440 PFTs, and offer ethnic diversity. The non invasive procedures as outlined in Table 2 will be performed  
441 by designated research personnel hired by the respective sites and performed at HIPPA compliant  
442 locations at the respective hospitals or other locations to decrease patient burden. The data center will  
443 continue to be housed at OHSU under the direction of Dr. Morris as was the case in the current vitamin  
444 C study and is being funded through a linked data coordinating application. This follow-up will continue  
445 the strong ongoing collaborations between Drs. McEvoy, Morris, and Spindel at OHSU, and Tepper (at  
446 Indiana University School of Medicine). Dr. McEvoy is internationally recognized for her clinical trials<sup>60</sup>  
447 and the VCSIP-ECHO will use her successful research infrastructure as used in VCSIP1 and  
448 VCSIP2.<sup>60-62</sup> She will be the PI at OHSU and PHSW. Dr. Tepper, a pediatric pulmonologist, will be the  
449 PI at Indiana University. He is widely known for his expertise in PFTs<sup>63;64</sup> with extensive experience and

450 publications evaluating pre-school and school aged children, both ages which will be studied in VCSIP-  
451 ECHO. He has also followed a cohort of infants with eczema longitudinally from the age of 1 with  
452 spirometric measurements pre and post bronchodilator at 4 years of age,<sup>65</sup> and methacholine bronchial  
453 challenge at 5 years of age<sup>66</sup>.

454  
455 Each PI will be responsible for the conduct of the research at their institution. OHSU will submit all  
456 required documents for approval to the OHSU IRB and is requesting that the Indiana University IRB  
457 and PeaceHealth IRB waive oversight of this follow-up study to the OHSU IRB.

458  
459 OHSU will be the coordinating center of this multi-center trial.  
460

461 **5.5. Recruitment Methods**

462  
463 This is a follow-up study of women and their children randomized in the current RCT. We have IRB  
464 approval to recontact these patients in the future follow-up. Subjects may be contacted to set up an  
465 appointments via phone calls, text messages, emails, or social media private messaging. Please see  
466 attached telephone script if contact is by phone.

467  
468 Time and travel reimbursements will be \$25 for each questionnaire and \$75 for visits that includes  
469 sample collections and/or PFTs. This will be reimbursed after the questionnaires or visits are completed  
470 and appropriate receipts signed and inventoried.

471  
472 **5.6. Consent Process**

473  
474 Written informed consent will be obtained from each subject's parent/legal guardian appropriately prior  
475 to any study procedures taking place. Individuals authorized to obtain written consent are the principal  
476 investigator (PI), co-investigators, and assigned staff specifically designated by the PI to work on this  
477 project. The informed consent process will occur in the participating hospitals, or a HIPPA compliant  
478 location of convenience to the family to maximize cohort retention. If consent is obtained by phone, a  
479 hard copy of the consent will be mailed to the patient with a self-addressed envelope, reviewed over the  
480 phone with the research staff, signed by the patient, returned to the research office and signed by the  
481 research staff and detailed in the patient's chart. If a respiratory questionnaire (RQ) is done at the same  
482 time as a phone consent, no information will be recorded until the signed consent is obtained by the  
483 research staff.

484  
485 The information provided in the consent and assent will cover the elements in the CFR Part 50.25 and  
486 be approved by the OHSU Institutional Review Board (IRB) which will provide IRB oversight on behalf  
487 of Indiana University and PeaceHealth IRBs. This includes the observational nature and objective of the  
488 trial; the procedures and treatments involved and their attendant risks, discomforts, and benefits; and  
489 the potential alternative therapies, alternative to not participate and right to withdraw without penalty, all  
490 of which will be explained to the parents in detail. All of the parent/legal guardian's questions will be  
491 answered before signing the consent form. If the parent/legal guardian wishes to take the consent form  
492 home to consult with other family members or health care providers, or to allow more time for  
493 consideration, they will be allowed to do so. A copy of the signed consent form will be given to the  
494 parent/legal guardian.

495  
496 The informed consent process will be an ongoing active process of sharing information between the  
497 investigator and the parent/legal guardian(s). If a protocol change requires a change to the consent  
498 form, parents/legal guardian(s) will be notified in a timely manner and the new informed consent form  
499 will be signed.

500

501 Permission may be obtained from legally authorized representatives, described as an individual who is  
 502 authorized under applicable state or local law to consent on behalf of a child to general medical care  
 503 when general medical care includes participation in research. We may contact the patients after  
 504 completion of this study to conduct a follow-up of this study or to conduct other studies. We would  
 505 obtain separate consents for those studies.  
 506

507 Patient participation may be ended at any time for medical reasons, if the researcher feels that it is in  
 508 your child’s best interest, or because the NHLBI finds it necessary to limit or terminate the study.  
 509

510 **6. Study Procedures and Methods**

511 **6.1 Overview**

512 The study personnel will continue to administer a similar standardized respiratory questionnaire  
 513 (updated for age) asked during the first 12 months of the current study. RQs will be obtained up to four  
 514 times per year. The coordinators will schedule yearly in person visits at which time study procedures  
 515 will be carried out including the RQ and additional appropriate “Ages and Stages”, childhood health  
 516 questionnaires, infant buccal swabs, maternal and child hair nicotine samples, and maternal exhaled  
 517 carbon monoxide (eCO) reading. Pulmonary function testing will begin when the child is at least 3  
 518 years of age. If the child is 3 years of age at enrollment, the PFT may be done at the time of the  
 519 consent or scheduled as a separate appointment. Pre and post bronchodilator spirometry testing will be  
 520 done yearly in children ≥ 4 years of age to identify under recognized airway hyperreactivity. These early  
 521 attempts will allow the child to practice and feel comfortable with the surroundings and testing. Blood  
 522 collection for genetics and epigenetics will be done once at age 5-6. A summary of the data collection in  
 523 the proposed study is shown in the Table 2 below.  
 524

525 **Table 2.** Summary of Questionnaires or Procedures  
 526

| Age in years                          | 1 | 2 | 3 | 4 | 5*** |
|---------------------------------------|---|---|---|---|------|
| Quarterly Respiratory questions       | X | X | X | X | X    |
| Impulse Oscillometry                  |   |   | X | X | X    |
| Spirometry                            |   |   |   | X | X    |
| Weight, height*                       | X | X | X | X | X    |
| Head, chest, abdominal circumference* | X | X | X | X | X    |
| Buccal swab                           | X | X | X | X | X    |
| Hair nicotine-mom and child           | X | X | X | X | X    |
| Exhaled carbon monoxide-Mom           | X | X | X | X | X    |
| Bronchodilator response               |   |   |   | X | X    |
| Blood for epigenetics/genetics**      |   |   |   |   | X    |

527 \* Measurements will be taken at each in-person visit

528 \*\* This will be up to 3 teaspoons of blood

529 \*\*\* Child will continue to be followed in study for up to 5 years total regardless of age  
 530

531 **6.2 Respiratory Questionnaires**

532 To compare the incidence of recurrent wheeze<sup>67-69</sup> between the children of randomized smokers, we  
 533 will use data obtained four times per year from the same standardized respiratory questionnaire (RQ)  
 534 being used in the ongoing study<sup>70-73</sup> (appendix) which will be updated for patient’s age, and from  
 535 clinician reports. The use of this RQ was requested by current study’s NIH appointed DSMB and has  
 536 been applied in similar NIH trials. The RQs may be done in person or over the phone. Parents will be  
 537 asked about new episodes of wheeze since the last questionnaire, medication prescriptions with  
 538 specifically outlined respiratory medications, other illnesses including physician diagnosed croup,  
 539

540 bronchitis, bronchiolitis, or pneumonia, symptoms of or physician diagnosed eczema, emergency room  
541 visits, second hand smoke exposure and hospitalizations. If an infant has wheezing associated with an  
542 illness lasting several days, this will be counted as one episode. The patient's electronic medical record  
543 may also be reviewed when available to confirm diagnosis, medications, etc. or when we are unable to  
544 perform a respiratory questionnaire. A small time reimbursement will be given to those patients who  
545 complete the questionnaires. Once per year we will ask additional questions about diet, behaviors,  
546 home environment, and potential sources of stress.

547

### 548 **6.3 Child Anthropometrics and Blood Pressure**

549 Height, weight, head, chest, and abdominal circumference, and blood pressure of the child will be taken  
550 at each in person visit.

551

### 552 **6.4 Maternal and Child Hair Nicotine Testing**

553

554 Small samples of maternal and child hair will be taken at each yearly in person visit as a quantification  
555 of second hand smoke exposure. Hair nicotine is determined by a modification of the methods of  
556 Hegstad et al<sup>74</sup> and Pichini et al<sup>75</sup> by tandem mass spectrometry (LC-MS/MS) using deuterated internal  
557 standards. Hair samples may also be analyzed for other substances such as cortisol that is an  
558 important determinant of lung development and function.

559

### 560 **6.5 Maternal Exhaled Carbon Monoxide Testing**

561

562 Non-invasive measurements of exhaled carbon monoxide (CO) will be performed by the child's mother  
563 at each yearly in person visit as a quick, non invasive estimate of acute second hand smoke exposure  
564 (Smokelyzer, Bedfont Scientific, London, UK).<sup>76</sup> The highest level of the parts per million (ppm) of  
565 carbon monoxide and the percent of carboxyhemoglobin (COHb) are then recorded.

566

### 567 **6.6 Child Buccal Swabs**

568

569 Buccal swabs will be collected on the child yearly to investigate DNA methylation patterns that may  
570 mediate subsequent respiratory disease after prenatal exposure to nicotine.<sup>77</sup> Buccal swabs will be  
571 done using Epicentre Catch-All wrapped soft foam swabs. Swabs will be done by rolling the swab on  
572 the inside of the infant's cheek, approximately 10-20 times on each side, making certain to roll the  
573 brush over the entire cheek. After collection the swab will be placed in the collection tube and stored at  
574 -20°C. To increase yield of cells a separate swab will be used for each cheek surface and each cheek  
575 will be swabbed separately twice.

576

### 577 **6.7 Continued Smoking Cessation Counseling**

578

579 Smoking cessation counseling will continue at the yearly visits under the guidance of co-investigator Dr.  
580 David Gonzales<sup>78;79</sup> of the OHSU Smoking Cessation Center. The best thing for the children and  
581 families would be the elimination of exposure to the toxicants in tobacco smoke. The annual visits will  
582 provide an opportunity for extra "teachable moments" for stopping smoking. Study participants will be  
583 provided brief smoking cessation counseling and educational materials. Staff will discuss dangers of  
584 first and secondhand smoke at annual visits and the implications of the exhaled carbon monoxide  
585 measurement as a proxy for toxicant exposure.

586

### 587 **6.8 Blood for Epigenetic Changes**

588

589 One blood sample will be drawn at age 5-6. Blood will be collected in 3 mL EDTA tubes and store at -  
590 80° C and analyzed for global and gene specific methylation changes.

591  
592  
593  
594

## 595 **6.9 Pulmonary Function Tests on Child**

596

597 All pulmonary function tests will be done by trained personnel from the infant/ child pulmonary function  
598 laboratories at OHSU, Riley Hospital for Children in Indianapolis, Indiana, and PHSW. The equipment  
599 being used is portable so this testing can be done either in one of these laboratories or in a HIPPA  
600 compliant location to ease the burden of the study on the patient. No testing will be done within 3 weeks  
601 of a respiratory illness and a test may be repeated if the quality was not acceptable. Of note, the PFT  
602 laboratory at Riley Children's hospital published the first normative data for spirometric measurements  
603 in young children between 3 and 6 years of age.<sup>80</sup> Cross training and certification will occur between  
604 the PFT laboratories prior to the start of the study to assure the same testing techniques and  
605 acceptance criteria are applied across sites. In addition, similar to the ongoing study, there will be  
606 weekly discussions between the sites regarding testing techniques to problem solve issues that arise  
607 for performance and acceptance criteria. For the spirometric measurements, acceptance criteria as  
608 modified per Eigen/Tepper et al <sup>80;81</sup> will be followed with each data set consisting of at least 3  
609 reproducible attempts (see protocol in appendix). Measurements will be reported as absolute values as  
610 well as corresponding z scores.<sup>82</sup> As an additional outcome, we will also evaluate both pre and post  
611 bronchodilator (albuterol) spirometry yearly in children ≥ 4years of age. An increase in FEF<sub>25-75</sub> with a  
612 bronchodilator indicates increased airway tone and heightened airway responsiveness. Also, if the  
613 difference between the two groups (vitamin C vs. placebo) is present pre-bronchodilator, but not post  
614 bronchodilator, this suggests that the lower baseline spirometry is related to increased airway tone and  
615 not fixed structural difference.

616

617 In addition, pulmonary function will be measured with the forced oscillation technique (FOT). FOT is a  
618 method of assessing lung function in children who cannot perform spirometry or plethysmography due  
619 to age or other factors.<sup>83-85</sup> With FOT, the child performs tidal breathing of ambient air via a  
620 pneumotachograph while measurements are performed with different frequencies of air oscillation. This  
621 is basically the human equivalent of oscillometry widely used in animals to measure airway  
622 resistance.<sup>86;87</sup> A measure of resistance to the flow of air into and out of the lung is usually determined  
623 from the ratio of pressure and flow during spontaneous breathing. This methodology has been  
624 demonstrated to differentiate between preschool children with and without asthma.<sup>83</sup> The infant PFT  
625 laboratory in Indianapolis has experience using FOT in 4 year old children.<sup>88</sup> We propose this  
626 measurement starting at 3 years of age. The use of this complementary technique to spirometry will  
627 maximize our ability to determine differences in lung function between children born to pregnant  
628 smokers randomized to vitamin C versus placebo. Cross training will be done prior to testing, the same  
629 equipment will be used at both sites, and the results will be reviewed by an independent reader. The  
630 primary outcome measure of the FOT will be the resistance at 8 Hz, and measurements at 5-11-19 Hz  
631 signal will also be recorded as obtainable.

632

### 633 **6.10.1 Quality Control of Pulmonary Function Tests**

634

635 The same equipment and testing software for spirometry (Morgan Scientific, Haverhill MA) and FOT  
636 (Resmon Pro, MGC Diagnostics, Saint Paul, MN) will be used at all testing facilities. Testing will be  
637 performed following the American Thoracic Society/ European Respiratory Society (ERS) criteria.<sup>81</sup> All  
638 test results will be reviewed by a trained, licensed Respiratory Technician and reviewed weekly for  
639 acceptability, reproducibility, and completeness. There will be annual review training sessions on the

640 proper use and maintenance of the equipment and coaching of the spirometry maneuvers appropriate  
641 to children.

642  
643  
644  
645  
646

## 647 **7. Data and Specimens**

648  
649  
650

### 649 **7.1 Handling of Specimens**

651 Specimens (maternal and child hair, child blood and cheek swabs) will be coded with subject study ID  
652 and date and time of collection. Patient name, initials, birth date and other potential identifiers are  
653 known only to the investigators at each study site and not made available to other personnel. The hair  
654 samples will be stored in static free manila envelopes at room temperature, the blood will be collected  
655 in EDTA tubes and stored at -80° C and the buccal swabs will be stored at -20°C. All samples will be  
656 stored in a secure location until they are batched by the respective study coordinators and shipped to  
657 Dr. Spindel's laboratory at the Oregon National Primate Research Center (ONPRC). Sample  
658 processing will occur and residual specimens will be stored in the IRB approved repository located at  
659 the ONPRC.

660 As below, specimen logs will be implemented in the REDCap study database. Detailed information  
661 about processing, storage location, and chain of custody will be recorded.

662

### 663 **7.2. Handling of Data**

664

#### 665 **7.2.1 Background of Data Center**

666

667 With the current study, we formed the structure of the Clinical Coordinating Center (CCC) which  
668 handled the clinical side of the study and the Data Coordinating Center (DCC) which handled the data  
669 side, thus providing the essential firewall needed to maintain blinding and allow for safety monitoring.  
670 To support the data coordination needs of the follow-up, we will continue the DCC to provide support  
671 for data collection and management, data quality, maintenance of protocol compliance, and  
672 biostatistical analysis. The biostatistics unit will be responsible for all data analyses and DSMB reports.

673

674

675 **Most importantly Dr. Morris and the DCC will ensure continued blinding of all clinical personnel**  
676 **and patients to the study treatment allocation from both the VCSIP1 and VCSIP2 trials.**

677

678

678 Maintaining the complete security of the allocation table and treatment assignment is of critical  
679 importance to this study. The allocation table is password protected and is stored off site for security.

679

#### 680 **7.2.2 Data Management and Quality Assurance.**

681

682 The primary data management goal is to provide high quality and timely data to study investigators, and  
683 effective study management tools to study staff. Key features of the data management system include  
684 a powerful and flexible data dictionary; real-time access to study data; real-time query generation and  
685 resolution; real-time audit trail and comprehensive reports for effective study management. The system  
686 also eliminates delays in identifying missing data and in cleaning data; real-time reports enable more  
687 efficient workflow; allows monitoring of study progress in real-time. The DCC has a data management  
688 plan that provides information on data management activities, responsibilities, scheduled study visits,  
689 required data collection forms, and data handling conventions, including data recorded in paper and

690 electronic formats. The data management plan serves as a reference guide to the operational  
691 procedures governing the data management activities throughout the lifecycle of the study.

### 692 7.2.3 REDCap Data Management System

693 We will utilize the REDCap (Research Electronic Data Capture) system to enable high-quality data  
694 collection and robust quality assurance processes by employing features such as discrepancy  
695 adjudication; field level validation including range and format checks; and branching/skip logic.  
696 REDCap provides an integrated database while simultaneously allowing remote site staff access to  
697 only their participants' data. This approach enables real-time data quality checks, safety monitoring,  
698 and together with its participant calendaring system, enables cohort retention to be monitored closely.  
699 REDCap's robust security system allows customized security schemes for individual case report forms,  
700 data export functions, and reporting. REDCap employs algorithms that allow easy creation of de-  
701 identified datasets to assist in producing sharable datasets to meet NIH requirements for data sharing.  
702 REDCap automatically maintains an audit trail of all data changes is maintained including timestamp,  
703 user initiating change, change record, type of change, changed fields, and field values. REDCap offers  
704 an automated export mechanism to several common statistical packages (SPSS, SAS, Stata, R/S-  
705 Plus). Data exports can be customized and security can be attached to the data export process and  
706 the reporting system providing access study data while maintaining blinding and maximizing participant  
707 data confidentiality. The power of REDCap will be a strength in providing the ECHO consortium with  
708 needed data elements.

709 Daily backups of all center data, code, documents, and other study-related digital assets will be created  
710 by OHSU's Advanced Computing Center. Two-weeks of daily backups and two weekly-backups are  
711 immediately available in the unlikely event that a restore is needed. After one month, backups are  
712 stored offline in a secure vault maintained by OHSU.

### 713 7.2.4 Data Collection Forms, Entry, Cleaning

714 Data will be collected on standardized forms on which nearly all responses have been precoded. The  
715 data collection protocol for the VCSIP study will utilize paper case report forms and will be entered into  
716 REDCap by the clinical center study staff. All paper charts will be stored in locked file cabinets. There  
717 will be a 10% random sample chart review. The data entry workflow and validation scheme are  
718 illustrated in the figure below.

719 *Figure 4. Multi-stage data validation*

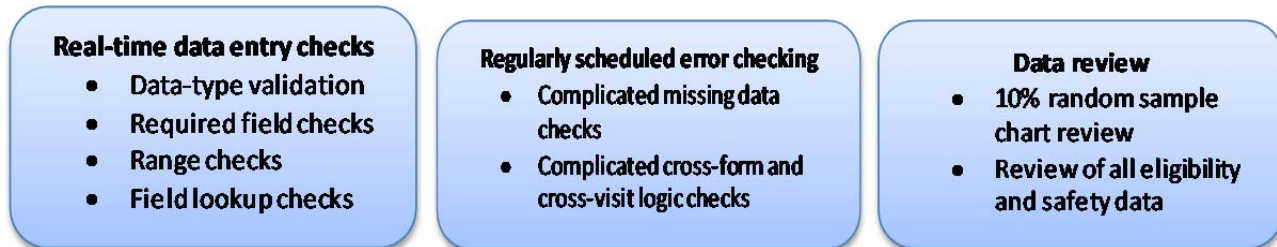

727 The discrepancy management process includes a variety of important data quality tasks. These include  
728 running production edit checks, reviewing data discrepancies produced by edit checks, generating  
729 queries, resolving discrepancies, and updating any relevant data in the database. All discrepancies will  
730 be reviewed by the Data Center staff who will either resolve the discrepancies or forward queries to  
731  
732



733 each site for clarification or resolution on data clarification forms, with a full audit trail generated for  
734 each modification.

735  
736 We will routinely perform quality control checks of data and implement cleaning procedures throughout  
737 the study duration. In addition, the data management team will perform the final quality control checks  
738 and clean the data to an optimal degree prior to locking the database at the end of the study. The data  
739 management team will ensure that all of the data have been entered, all discrepancies resolved, and  
740 final data updates completed before it begins the final quality control checks of data prior to data lock.

741  
742

### 743 **7.2.5 Data Access and Security**

744

745 Access to data in the study database will be controlled through REDCap's role-based security system  
746 based upon the principle of least access. Each site will only be able to access the data from subjects  
747 enrolled at their own site. Blinding is maintained by restricting access to a separately-maintained  
748 REDCap form to only those data management staff needed to maintain group assignment in  
749 accordance with the treatment assignment blinding procedure. Security assignment will be managed  
750 and maintained by the Data Coordinator, Julie Mitchell.

751

### 752 **7.2.6 Manual of Operations and Training**

753

754 The manual of operations will be appended with procedures for this additional follow-up period. This  
755 includes specimen handling procedures, data collection forms, all study data collection instruments,  
756 procedures for pulmonary function testing, procedures for completing and handling the collection forms,  
757 data entry screens and associated procedures, and monitoring procedures for adverse events, accrual,  
758 lab quality and timeliness. The steering committee will review and approve the manual of operations  
759 before study enrollment begins.

760

761 While at present we anticipate no or minimal change in personnel, we will plan for a training procedure  
762 in order to ensure that the protocol is followed accurately and completely. We will structure training  
763 sessions and materials around specific competency-based objectives. The training program and  
764 supporting materials will address study objectives, study design, screening and recruitment procedures,  
765 data collection procedures, the data management process, and protection of patient rights.

766

### 767 **7.2.7 Site Monitoring.**

768

769 On-site performance monitoring of a clinical site is an important component in the overall plan for  
770 quality assurance and data quality control. During this follow-up, site monitoring will be performed at  
771 the time of periodic pulmonary function testing calibration that will occur between Pacific Northwest and  
772 Indiana sites. At that visit, data coordination personnel will monitor that consent has been obtained;  
773 ensure the accuracy and completeness of data; and will review for protocol modifications.

774

775

### 776 **7.3 Sharing of Results with Subjects**

777

778 Any clinically significant results from the PFT spirometry of blood pressure measurements will be  
779 shared with the offspring's primary care practitioner. Results of the FOT testing and genetic information  
780 will not be shared with the patients as its clinical significance at present is unknown. The blood testing  
781 will not be done until the study is over and will only be used for research.

782

783

784 **7.4 Data and Specimen Banking**

785

786 Data and specimens may be used for future research that may include genetic research. All data and  
787 specimens will be de-identified and will be stored in an existing OHSU repository that contains data and  
788 specimens from the two vitamin C studies. See OHSU eIRB 2893 repository protocol also uploaded  
789 with this submission. Repository procedures will be followed to release specimens or data to outside  
790 investigators. There is no scheduled date on which the samples will be destroyed. The samples may be  
791 stored for research until they are “used up”.

792

793

794 **8. Data Analysis**

795

796 **8.1 Analysis Plan of Primary Aim**

797

798 **Specific Aim 1 (Primary Outcome): The primary aim of this study is to demonstrate improved**  
799 **pulmonary function at 5 years of age in the offspring of pregnant smokers randomized to**  
800 **vitamin C (500 mg/day) versus placebo.** We hypothesize that vitamin C supplementation in  
801 pregnancy will block the adverse effects of maternal smoking on offspring pulmonary function  
802 measured at 5 years of age by spirometry. Impulse oscillometry (IOS) will also be used at 3-5 years of  
803 age to assess pulmonary function.

804

805 We anticipate that those children whose mothers were treated with placebo during pregnancy will have  
806 lower baseline spirometry at 5 years of age compared to those whose mothers were treated with  
807 Vitamin C. We have an excellent cohort retention and project that 208 children will be have PFTs  
808 performed at 5 years of age (Figure 7). As per the linked DCC statistical analysis, this sample sizes will  
809 give us a 90% power to show a 13% to 15% increase in the FEF<sub>25-75</sub> for children born to smokers  
810 randomized to vitamin C versus placebo which would be both statistically and clinically significant as  
811 demonstrated by our published data and other outcome trials.<sup>5,89</sup> Our previous experience<sup>80</sup> assessing  
812 spirometry in this young age group suggests that we will obtain technically acceptable measurements in  
813 at least 90% of the children. We anticipate this high success rate by having experienced laboratory  
814 personnel, repeated contact with these young children and their mothers/caregivers to ensure they feel  
815 comfortable with study staff, and practicing the spirometric testing during visits at a younger age. If the  
816 test does not meet acceptance criteria we will also approach the parents about a repeat attempt in a  
817 few weeks. This has already been discussed with the parents. We will provide a time and travel stipend  
818 at the yearly visit and we have an additional reimbursement in place for patients who have moved out  
819 of the area.

820

821 **8.1.3. Additional Pulmonary Function Tests**

822 Although the primary endpoint is FEF<sub>25-75</sub>, similar analyses will be repeated for other forced expiratory  
823 flow measures: FEF<sub>75</sub>, FEF<sub>50</sub>. Forced expiratory volumes will also be evaluated including forced vital  
824 capacity (FVC), forced expired volume in the initial 0.4 sec (FEV<sub>0.4</sub>) and 0.5 sec (FEV<sub>0.5</sub>) and the ratio  
825 of FEV<sub>0.5</sub>/FVC.

826

827 **8.2 Analysis Plan of Secondary Aim of Wheezing**

828

829 **Specific Aim 2 (Secondary Outcome): The secondary aim of this study is to demonstrate a**  
830 **decreased incidence of wheeze at 5 years of age in offspring of pregnant smokers randomized**  
831 **to vitamin C (500 mg/day) versus placebo.** We hypothesize that vitamin C supplementation during  
832 pregnancy will decrease the incidence of wheeze at 5 years of age in offspring of smokers. Respiratory  
833 health will be assessed by quarterly validated respiratory questionnaires and clinician report.

834

835 We continue to have a 92.4% completion of quarterly RQs and have the infrastructure in place to  
836 continue at this high quality rate of data collection. We anticipate that those children whose mothers  
837 were treated with placebo during pregnancy will have a higher occurrence of recurrent wheeze  
838 compared to those children whose mothers were treated with vitamin C. In our published pilot study,  
839 the occurrence of wheeze was 40% in the placebo treated group and 21% in the vitamin C treated  
840 group. Even if there is an unexpected 25% decrease in our projected sample size of 104 per treatment  
841 group, we will have 80% power to detect a 50% decrease in recurrent wheeze if the control incidence is  
842 40% or higher, which given our current aggregate occurrence of wheeze is achievable. The power will  
843 exceed 90% for the same RR if the control incidence is 50% or higher (see DCC statistical plan for  
844 more detail). If the higher incidence of recurrent wheeze is also related to lower baseline spirometry,  
845 which disappears following a bronchodilator, it would suggest that the vitamin C treatment suppressed  
846 the development of airway hyper-responsiveness, and the potential for asthma. However, if the higher  
847 incidence of recurrent wheeze in the placebo treated group is associated with lower pre and post  
848 bronchodilator spirometry, this would suggest that vitamin C suppressed the development of fixed  
849 airways obstruction secondary to maternal smoking during pregnancy.

850

#### 851 **8.4 Missing Data.**

852

853 We will make every reasonable effort to retain this cohort to preserve the integrity of the study and to  
854 minimize possible bias associated with withdrawal or loss to follow-up. The statistical analysis using  
855 mixed models as described provides valid inference if the missing data is missing at random (MAR).  
856 However, in the case that the data are not missing at random (NMAR), we will perform multiple  
857 imputation propensity score modeling and then sensitivity analysis will be performed to examine the  
858 sensitivity of the inferences to departures from the MAR assumption.

859

860

#### 861 **8.5 Timeline**

862

863 Yearly PFTs, longitudinal data collection, analysis of epigenetic changes and interaction with the overall  
864 cohort will occur in years 1-4.5 of the study.

865

866

#### 867 **9. Privacy, Confidentiality, and Data Security**

868

869 Upon enrollment into the initial portion of the studies, mothers and their offspring were assigned a code  
870 that was used instead of their name, medical record number or other personally identifying information.  
871 Electronic files for data analysis contain only that subject code and this code will be continued in this  
872 follow-up study. The subject codes do not contain any part of the 18 HIPAA identifiers (initials, DOB,  
873 MRN). The key associating the codes and the subjects personally identifying information are restricted  
874 to the PI and the clinical study staff. The key will be kept secure as outlined below. Data will be entered  
875 into the REDCap system by site study personnel.

876

877 Standard practices will be followed to maintain the confidentiality and security of data collected in this  
878 study. Study staff will be trained with regard to these procedures. Paper files will be stored in locked  
879 filing cabinets in restricted access locations. Electronic data will be stored in a web-accessible  
880 encrypted REDCap database housed on the OHSU secure server under the direction of Dr. Morris.  
881 Access to data/specimens is restricted to study personnel.

882

#### 883 **10. Provision to Monitor Safety**

884  
885  
886  
887  
888  
889  
890  
891  
892  
893  
894  
895  
896  
897  
898  
899  
900  
901  
902  
903  
904  
905  
906  
907  
908  
909  
910  
911  
912  
913  
914  
915  
916  
917  
918  
919  
920  
921  
922  
923  
924  
925  
926  
927  
928  
929  
930  
931  
932

This is a minimal risk protocol. The data center under Dr. Morris and in conjunction with the NIH-appointed DSMB(see uploaded list of members) which monitored the current vitamin C study will monitor safety, protocol adherence, patient retention, AEs and SAEs. We will adhere to the schedule and content of reports that the NIH DSMB requests. Any serious adverse events and protocol deviations that are determined to be unanticipated problems will be sent to the DSMB chair within 7 days of the occurrence of the event.

We will document and report all events that are considered possibly related to the study in any way and all Serious Adverse Events (SAE's) that occur in the pediatric study population. A Serious Adverse Event is any event meeting the following criteria:

- Death
- Life Threatening
- Hospitalization or prolongation of hospitalization
- Disability or permanent damage
- Congenital abnormality
- Required intervention to prevent permanent impairment or damage
- Other (important medical event)

These events will be identified by interviewing the subject's parents, completing the respiratory questionnaires, physical exam/observation (during the in person visits) and by reviewing medical records when necessary/available.

1. Plan for reporting both anticipated and unanticipated adverse events.

- a. Each child is evaluated for any adverse events.
  - b. Any event that is possibly related to the study or meets criteria for a Serious Adverse event will be documented as such.
  - c. All documented events will be reported per each site's IRB policy.
  - e. All adverse events will be summarized annually and submitted to the IRB.
  - f. Any action resulting in a temporary or permanent suspension of the study (e.g. IRB actions or actions by the investigators or co-investigators) will be reported to the DCC and the appropriate NIH program official.

**11. Risks and Benefits**

**11.1 Minimal Risks to Subjects**

The risks associated with participation in this study are minimal and are related to the administration of a bronchodilator during the non sedated lung function testing, phlebotomy (one blood sample at 5-6 years of age), and any potential breach of confidentiality.

Bronchodilator

Each child will be monitored closely after the administration of the bronchodilator and during the test. This treatment can uncommonly cause a temporary increase in heart rate similar to what occurs after children do vigorous exercise or have a caffeinated drink. When this occurs the trained staff will reassure the child that the experience will be short-lived and resolve without intervention. In addition studies have shown that 50% of children receive a bronchodilator treatment in the first 5 years of life.

Blood draw

933 The subject may feel some pain when their blood is drawn. There is a small chance the needle will  
934 cause bleeding, a bruise, an infection, or fainting.

935  
936 Personnel trained in blood draws in children will perform the blood draw using standard precautions.  
937 When possible, a topical numbing agent will be used to minimize pain to the child.

#### 938 Confidentiality

939 There is a risk to confidentiality. This risk will be minimized by storing the subjects personal and  
940 medical information collected as part of this study in a secure location as detailed in section 8 above.  
941 Risks will be minimal as there is no intervention being done.

942  
943

#### 944 **11.2 Potential Benefit to Subjects**

945 The subject may or may not benefit from taking part in this follow-up study. The benefits of being in the  
946 study may be a chance that the PFTs demonstrate an unrecognized airway hyper responsiveness  
947 which would be cautionary for the subject and their parents. The subject and their family will also  
948 receive additional smoking cessation information and education on the effects of second hand smoke  
949 exposure. Participation may provide information about the long term effects of supplemental vitamin C  
950 given to pregnant smokers on the respiratory outcomes of their offspring. Still, the subject may get no  
951 direct benefit from this study.

952  
953

#### 953 **12. Resources Available**

954  
955 PFTs in infants less than 5-6 years of age can be challenging but of note, Dr. Tepper and the laboratory  
956 at the collaborating center at Riley Children's hospital published the first normative data for spirometric  
957 measurements in young children between 3 and 6 years of age.<sup>80</sup> All sites have a track record for  
958 reproducible infant PFTs and extensive cross training will occur between sites prior to testing to ensure  
959 reproducibility.

960  
961

#### 961 **13. Drugs and Devices**

962 A bronchodilator, albuterol, will be used during spirometry. See package insert for more information.

963  
964  
965  
966

964 A topical anesthetic, LMX4, will be used when possible during blood draws. See package insert for  
965 more information.

#### 967 **14. Multi-Site Coordination**

968  
969

969 Dr. McEvoy at OHSU will obtain approval of the protocol, consent, and other pertinent items at  
970 OHSU and will request that OHSU provides oversight of this minimal risk protocol to the IRBs at  
971 Indiana University (IU) and the PeaceHealth System IRB of PHSW and will request that these IRBs  
972 accept the oversight of the OHSU IRB. This will be done via signed authorization forms between  
973 OHSU and the respective IRBs. All approved items will be uploaded and maintained at the IU and  
974 PHSW IRB prior to starting and throughout the study.

975  
976

976 Prior to beginning the study, all sites will have a site initiation by the PI. At that visit, the study  
977 protocol and procedures will be reviewed, with site sponsor, study coordinator, study respiratory  
978 staff, and other medical staff. A manual of operations will be provided and reviewed. The PI will  
979 meet separately with study coordinator to review all regulatory and study procedures. Appropriate  
980 recording of clinical data as specified by FDA Regulations for Good Clinical Practice will be  
981 reviewed with study personnel.

982

983 During subject enrollment, the PI will communicate regularly with site coordinators and through the  
984 data center to review consent and subject status and data completion. Sites will complete data on  
985 case report forms (CRFs) and then enter data into a secure REDCap database housed on the UCSF  
986 server. Data will be assessed for quality via automated and manual processes. Queries (data  
987 discrepancies) will be generated to identify potential errors in the study data and to resolve them in a  
988 timely manner. Copies of the original site CRFs will be faxed or pdf to DCC on a scheduled basis for  
989 comparison with REDCap entries. Original CRF documents are kept by the site in a secure location  
990 for their records. The study coordinator at each site (or designate) will review all CRFs for  
991 completeness, accuracy and consistency prior to entry into REDCap.

992  
993 **15. Community-based Participatory Research- Not applicable**

Reference List

- 994  
995  
996 (1) Tong VT, Jones JR, Dietz PM, D'Angelo D, Bombard JM. Trends in smoking before, during, and  
997 after pregnancy - Pregnancy Risk Assessment Monitoring System (PRAMS), United States, 31  
998 sites, 2000-2005. *MMWR Surveill Summ* 2009;58:1-29.
- 999 (2) US Department of Health and Human Services. The Health Consequences of Involuntary  
1000 Exposure to Tobacco Smoke: A Report of the Surgeon General—Executive Summary. 1-27.  
1001 2006. Centers for Disease Control and Prevention.
- 1002 (3) Hayatbakhsh MR, Sadasivam S, Mamun AA, Najman JM, O'callaghan MJ. Maternal smoking  
1003 during and after pregnancy and lung function in early adulthood: A prospective study. *Thorax*  
1004 2009;64:810-814.
- 1006 (4) Stoddard JJ, Gray B. Maternal smoking and medical expenditures for childhood respiratory  
1007 illness. *Am J Public Health* 1997;87:205-209.
- 1008 (5) McEvoy CT, Schilling D, Clay N et al. Vitamin C supplementation for pregnant smoking women  
1009 and pulmonary function in their newborn infants: a randomized clinical trial. *JAMA*  
1010 2014;311:2074-2082.
- 1011 (6) Fillion KB, Abenhaim HA, Mottillo S et al. The effect of smoking cessation counselling in  
1012 pregnant women: a meta-analysis of randomised controlled trials. *BJOG* 2011;118:1422-1428.
- 1013 (7) Schneider S, Huy C, Schutz J, Diehl K. Smoking cessation during pregnancy: a systematic  
1014 literature review. *Drug Alcohol Rev* 2010;29:81-90.
- 1015 (8) Rantakallio P. Relationship of maternal smoking to morbidity and mortality of the child up to the  
1016 age of five. *Acta Paediatr Scand* 1978;67:621-631.
- 1017 (9) Taylor B, Wadsworth J. Maternal smoking during pregnancy and lower respiratory tract illness in  
1018 early life. *Archives of Disease in Childhood* 1987;62:786-791.
- 1019 (10) Burke H, Leonardi-Bee J, Hashim A et al. Prenatal and passive smoke exposure and incidence  
1020 of asthma and wheeze: systematic review and meta-analysis. *Pediatrics* 2012;129:735-744.
- 1021 (11) Neuman A, Hohmann C, Orsini N et al. Maternal smoking in pregnancy and asthma in  
1022 preschool children: a pooled analysis of eight birth cohorts. *Am J Respir Crit Care Med*  
1023 2012;186:1037-1043.
- 1024 (12) Stocks J, Hislop A, Sonnappa S. Early lung development: lifelong effect on respiratory health  
1025 and disease. *Lancet Respir Med* 2013;1:728-742.
- 1026 (13) Salihi HM, Aliyu MH, Pierre-Louis BJ, Alexander GR. Levels of excess infant deaths  
1027 attributable to maternal smoking during pregnancy in the United States. *Matern Child Health J*  
1028 2003;7:219-227.
- 1029 (14) Dietz PM, England LJ, Shapiro-Mendoza CK, Tong VT, Farr SL, Callaghan WM. Infant morbidity  
1030 and mortality attributable to prenatal smoking in the U.S. *Am J Prev Med* 2010;39:45-52.

- 1031 (15) Best D. From the American Academy of Pediatrics: Technical report--Secondhand and prenatal  
1032 tobacco smoke exposure. *Pediatrics* 2009;124:e1017-e1044.
- 1033 (16) Leung GM, Ho LM, Lam TH. The economic burden of environmental tobacco smoke in the first  
1034 year of life. *Arch Dis Child* 2003;88:767-771.
- 1035 (17) Fergusson DM, Horwood LJ, Shannon FT. Parental smoking and respiratory illness in infancy.  
1036 *Arch Dis Child* 1980;55:358-361.
- 1037 (18) Margolis PA, Keyes LL, Greenberg RA, Bauman KE, LaVange LM. Urinary cotinine and parent  
1038 history (questionnaire) as indicators of passive smoking and predictors of lower respiratory  
1039 illness in infants. *Pediatr Pulmonol* 1997;23:417-423.
- 1040 (19) Tager IB, Weiss ST, Munoz A, Rosner B, Speizer FE. Longitudinal study of the effects of  
1041 maternal smoking on pulmonary function in children. *N Engl J Med* 1983;309:699-703.
- 1042 (20) Brown RW, Hanrahan JP, Castile RG, Tager IB. Effect of maternal smoking during pregnancy  
1043 on passive respiratory mechanics in early infancy. *Pediatr Pulmonol* 1995;19:23-28.
- 1044 (21) Stick SM, Burton PR, Gurrin L, Sly PD, LeSouef PN. Effects of maternal smoking during  
1045 pregnancy and a family history of asthma on respiratory function in newborn infants. *Lancet*  
1046 1996;348:1060-1064.
- 1047 (22) Lodrup Carlsen KC, Jaakkola JJ, Nafstad P, Carlsen KH. In utero exposure to cigarette smoking  
1048 influences lung function at birth. *Eur Respir J* 1997;10:1774-1779.
- 1049 (23) Li YF, Gilliland FD, Berhane K et al. Effects of in utero and environmental tobacco smoke  
1050 exposure on lung function in boys and girls with and without asthma. *Am J Respir Crit Care Med*  
1051 2000;162:2097-2104.
- 1052 (24) Hanrahan JP, Tager IB, Segal MR et al. The effect of maternal smoking during pregnancy on  
1053 early infant lung function. *Am Rev Respir Dis* 1992;145:1129-1135.
- 1054 (25) Cigarette use among high school students--United States, 1991-2007. *MMWR Morb Mortal*  
1055 *Wkly Rep* 2008;57:686-688.
- 1056 (26) Hoo AF, Henschen M, Dezateux C, Costeloe K, Stocks J. Respiratory function among preterm  
1057 infants whose mothers smoked during pregnancy. *Am J Respir Crit Care Med* 1998;158:700-  
1058 705.
- 1059 (27) Tager IB, Hanrahan JP, Tosteson TD et al. Lung function, pre- and post-natal smoke exposure,  
1060 and wheezing in the first year of life. *Am Rev Respir Dis* 1993;147:811-817.
- 1061 (28) Adler A, Tager IB, Brown RW, Ngo L, Hanrahan JP. Relationship between an index of tidal flow  
1062 and lower respiratory illness in the first year of life. *Pediatr Pulmonol* 1995;20:137-144.
- 1063 (29) Martinez FD, Morgan WJ, Wright AL, Holberg CJ, Taussig LM. Diminished lung function as a  
1064 predisposing factor for wheezing respiratory illness in infants. *N Engl J Med* 1988;319:1112-  
1065 1117.



- 1066 (30) Dezateux C, Stocks J, Dundas I, Fletcher ME. Impaired Airway Function and Wheezing in  
1067 Infancy. The influence of maternal smoking and a genetic predisposition to asthma. *Am J Respir*  
1068 *Crit Care Med* 1999;159:403-410.
- 1069 (31) Haland G, Carlsen KC, Sandvik L et al. Reduced lung function at birth and the risk of asthma at  
1070 10 years of age. *N Engl J Med* 2006;355:1682-1689.
- 1071 (32) Yuksel B, Greenough A, Giffin F, Nicolaidis KH. Tidal breathing parameters in the first week of  
1072 life and subsequent cough and wheeze. *Thorax* 1996;51:815-818.
- 1073 (33) Young S, Arnott J, O'Keefe PT, Le Souef PN, Landau LI. The association between early life  
1074 lung function and wheezing during the first 2 yrs of life. *Eur Respir J* 2000;15:151-157.
- 1075 (34) Martinez FD. The origins of asthma and chronic obstructive pulmonary disease in early life. *Proc*  
1076 *Am Thorac Soc* 2009;6:272-277.
- 1077 (35) Holberg CJ, Wright AL, Martinez FD, Morgan WJ, Taussig LM. Child day care, smoking by  
1078 caregivers, and lower respiratory tract illness in the first 3 years of life. *Group Health Medical*  
1079 *Associates. Pediatrics* 1993;91:885-892.
- 1080 (36) Turner S, Fielding S, Mullane D et al. A longitudinal study of lung function from 1 month to 18  
1081 years of age. *Thorax* 2014;69:1015-1020.
- 1082 (37) Tagiyeva N, Devereux G, Fielding S, Turner S, Douglas G. Outcomes of Childhood Asthma and  
1083 Wheezy Bronchitis. A 50-Year Cohort Study. *Am J Respir Crit Care Med* 2016;193:23-30.
- 1084 (38) Mullane D, Turner SW, Cox DW, Goldblatt J, Landau LI, Le Souef PN. Reduced infant lung  
1085 function, active smoking, and wheeze in 18-year-old individuals. *JAMA Pediatr* 2013;167:368-  
1086 373.
- 1087 (39) Sly PD, Bush A. From the Cradle to the Grave: The Early-Life Origins of Chronic Obstructive  
1088 Pulmonary Disease. *Am J Respir Crit Care Med* 2016;193:1-2.
- 1089 (40) DiFranza JR, Wellman RJ, Sargent JD, Weitzman M, Hipple BJ, Winickoff JP. Tobacco  
1090 promotion and the initiation of tobacco use: assessing the evidence for causality. *Pediatrics*  
1091 2006;117:e1237-e1248.
- 1092 (41) Anderson SJ, Glantz SA, Ling PM. Emotions for sale: cigarette advertising and women's  
1093 psychosocial needs. *Tob Control* 2005;14:127-135.
- 1094 (42) Schroeder SA. Tobacco control in the wake of the 1998 master settlement agreement. *N Engl J*  
1095 *Med* 2004;350:293-301.
- 1096 (43) Wang JC, Cruchaga C, Saccone NL et al. Risk for nicotine dependence and lung cancer is  
1097 conferred by mRNA expression levels and amino acid change in CHRNA5. *Hum Mol Genet*  
1098 2009;18:3125-3135.
- 1099 (44) Saccone SF, Hinrichs AL, Saccone NL et al. Cholinergic nicotinic receptor genes implicated in a  
1100 nicotine dependence association study targeting 348 candidate genes with 3713 SNPs. *Hum*  
1101 *Mol Genet* 2007;16:36-49.

- 1102 (45) Bierut LJ, Madden PA, Breslau N et al. Novel genes identified in a high-density genome wide  
1103 association study for nicotine dependence. *Hum Mol Genet* 2007;16:24-35.
- 1104 (46) Mohsin M, Bauman AE. Socio-demographic factors associated with smoking and smoking  
1105 cessation among 426,344 pregnant women in New South Wales, Australia. *BMC Public Health*  
1106 2005;5:138.
- 1107 (47) Kahn RS, Certain L, Whitaker RC. A reexamination of smoking before, during, and after  
1108 pregnancy. *Am J Public Health* 2002;92:1801-1808.
- 1109 (48) Smoking prevalence among women of reproductive age--United States, 2006. *MMWR Morb*  
1110 *Mortal Wkly Rep* 2008;57:849-852.
- 1111 (49) Cigarette smoking among adults and trends in smoking cessation - United States, 2008. *MMWR*  
1112 *Morb Mortal Wkly Rep* 2009;58:1227-1232.
- 1113 (50) Sekhon HS, Jia Y, Raab R et al. Prenatal nicotine increases pulmonary alpha7 nicotinic  
1114 receptor expression and alters fetal lung development in monkeys. *J Clin Invest* 1999;103:637-  
1115 647.
- 1116 (51) Sekhon HS, Keller JA, Benowitz NL, Spindel ER. Prenatal nicotine exposure alters pulmonary  
1117 function in newborn rhesus monkeys. *Am J Respir Crit Care Med* 2001;164:989-994.
- 1118 (52) Proskocil BJ, Sekhon HS, Clark JA et al. Vitamin C Prevents the Effects of Prenatal Nicotine on  
1119 Pulmonary Function in Newborn Monkeys. *Am J Respir Crit Care Med* 2005;171:1032-1039.
- 1120 (53) Bruin JE, Petre MA, Lehman MA et al. Maternal nicotine exposure increases oxidative stress in  
1121 the offspring. *Free Radic Biol Med* 2008;44:1919-1925.
- 1122 (54) Gunes T, Koklu E, Gunes I, Narin F, Koklu S. Influence of maternal nicotine exposure on  
1123 neonatal rat oxidant-antioxidant system and effect of ascorbic acid supplementation. *Hum Exp*  
1124 *Toxicol* 2008;27:781-786.
- 1125 (55) Jaimes E, Tian RX, Raji L. Nicotine: The Link Between Cigarette Smoking and the Progression  
1126 of Renal Injury? *Am J Physiol Heart Circ Physiol* 2006.
- 1127 (56) Ozokutan BH, Ozkan KU, Sari I, Inanc F, Guldur ME, Kilinc M. Effects of Maternal Nicotine  
1128 Exposure during Lactation on Breast-Fed Rat Pups. *Biol Neonate* 2005;88:113-117.
- 1129 (57) Sargeant LA, Jaeckel A, Wareham NJ. Interaction of vitamin C with the relation between  
1130 smoking and obstructive airways disease in EPIC Norfolk. *European Prospective Investigation*  
1131 *into Cancer and Nutrition. Eur Respir J* 2000;16:397-403.
- 1132 (58) Schwartz J, Weiss ST. Relationship between dietary vitamin C intake and pulmonary function in  
1133 the First National Health and Nutrition Examination Survey (NHANES I). *Am J Clin Nutr*  
1134 1994;59:110-114.
- 1135 (59) Bierut LJ. Convergence of genetic findings for nicotine dependence and smoking related  
1136 diseases with chromosome 15q24-25. *Trends Pharmacol Sci* 2010;31:46-51.

- 1137 (60) McEvoy C, Schilling D Peters D Tillotson C Spitale P Wallen L Segel S Bowling S Gravett M  
1138 Durand M. Respiratory compliance in preterm infants after a single rescue course of antenatal  
1139 steroids: A randomized controlled trial. *Am J Obstet Gynecol* 2010; 202: 544-549..  
1140
- 1141 (61) McEvoy C, Bowling S, Williamson K ,McGaw P, Durand M. Randomized, double-blinded trial of  
1142 low dose dexamethasone: II. Functional residual capacity and pulmonary outcome in very low  
1143 birth weight infants at risk for bronchopulmonary dysplasia. *Pediatr Pulmonol* 38, 55-63. 2004.  
1144
- 1145 (62) McEvoy C, Schilling D, Spitale P, Peters D, O'Malley J, Durand M. Decreased respiratory  
1146 compliance in infants less than or equal to 32 weeks' gestation, delivered more than 7 days  
1147 after antenatal steroid therapy. *Pediatrics* 2008;121:e1032-e1038.
- 1148 (63) Jones MH, Davis SD, Grant D, Christoph K, Kisling J, Tepper RS. Forced expiratory maneuvers  
1149 in very young children. Assessment of flow limitation. *Am J Respir Crit Care Med* 1999;159:791-  
1150 795.
- 1151 (64) Sly PD, Tepper R, Henschen M, Gappa M, Stocks J. Tidal forced expirations. ERS/ATS Task  
1152 Force on Standards for Infant Respiratory Function Testing. *European Respiratory*  
1153 *Society/American Thoracic Society. Eur Respir J* 2000;16:741-748.
- 1154 (65) Sarria EE, Mattiello R, Yao W et al. Atopy, cytokine production, and airway reactivity as  
1155 predictors of pre-school asthma and airway responsiveness. *Pediatr Pulmonol* 2014;49:132-  
1156 139.
- 1157 (66) Chang D, Yao W, Tiller CJ et al. Exhaled nitric oxide during infancy as a risk factor for asthma  
1158 and airway hyperreactivity. *Eur Respir J* 2015;45:98-106.
- 1159 (67) Ly NP, Gold DR, Weiss ST, Celedon JC. Recurrent wheeze in early childhood and asthma  
1160 among children at risk for atopy. *Pediatrics* 2006;117:e1132-e1138.
- 1161 (68) Joad JP. Smoking and pediatric respiratory health. *Clin Chest Med* 2000;21:37-viii.
- 1162 (69) Gold DR, Burge HA, Carey V, Milton DK, Platts-MILLS T, Weiss ST. Predictors of Repeated  
1163 Wheeze in the First Year of Life. The relative roles of cockroach, birth weight, acute lower  
1164 respiratory illness, and maternal smoking. *Am J Respir Crit Care Med* 1999;160:227-236.
- 1165 (70) Camargo CA, Jr., Rifas-Shiman SL, Litonjua AA et al. Maternal intake of vitamin D during  
1166 pregnancy and risk of recurrent wheeze in children at 3 y of age. *Am J Clin Nutr* 2007;85:788-  
1167 795.
- 1168 (71) Devereux G, Litonjua AA, Turner SW et al. Maternal vitamin D intake during pregnancy and  
1169 early childhood wheezing. *Am J Clin Nutr* 2007;85:853-859.
- 1170 (72) Weiss ST, Litonjua AA. The In Utero Effects of Maternal Vitamin D Deficiency: How it Results in  
1171 Asthma and Other Chronic Diseases. *Am J Respir Crit Care Med* 2011;183:1286-1287.
- 1172 (73) Benson BJ, Hadley ME. In vitro characterization of adrenergic receptors controlling skin gland  
1173 secretion in two anurans *Rana Pipiens* and *Xenopus Laevis*. *Comp Biochem Physiol*  
1174 1969;30:857-864.

- 1175 (74) Hegstad S, Khiabani HZ, Kristoffersen L, Kunoe N, Lobmaier PP, Christophersen AS. Drug  
1176 screening of hair by liquid chromatography-tandem mass spectrometry. *J Anal Toxicol*  
1177 2008;32:364-372.
- 1178 (75) Pichini S, Altieri I, Pellegrini M, Pacifici R, Zuccaro P. Hair analysis for nicotine and cotinine:  
1179 evaluation of extraction procedures, hair treatments, and development of reference material.  
1180 *Forensic Sci Int* 1997;84:243-252.
- 1181 (76) Fagerstrom KO. Assessment of the smoker who wants to quit. *Monaldi Arch Chest Dis*  
1182 2001;56:124-127.
- 1183 (77) Breton CV, Byun HM, Wenten M, Pan F, Yang A, Gilliland FD. Prenatal tobacco smoke  
1184 exposure affects global and gene-specific DNA methylation. *Am J Respir Crit Care Med*  
1185 2009;180:462-467.
- 1186 (78) Gonzales D, Bjornson W, Durcan MJ et al. Effects of gender on relapse prevention in smokers  
1187 treated with bupropion SR. *Am J Prev Med* 2002;22:234-239.
- 1188 (79) Hays JT, Hurt RD, Rigotti NA et al. Sustained-release bupropion for pharmacologic relapse  
1189 prevention after smoking cessation. a randomized, controlled trial. *Annals of Internal Medicine*  
1190 2001;135:423-433.
- 1191 (80) Eigen H, Bieler H, Grant D et al. Spirometric pulmonary function in healthy preschool children.  
1192 *Am J Respir Crit Care Med* 2001;163:619-623.
- 1193 (81) Beydon N, Davis SD, Lombardi E et al. An official American Thoracic Society/European  
1194 Respiratory Society statement: pulmonary function testing in preschool children. *Am J Respir*  
1195 *Crit Care Med* 2007;175:1304-1345.
- 1196 (82) Jones M, Castile R, Davis S et al. Forced expiratory flows and volumes in infants. Normative  
1197 data and lung growth. *Am J Respir Crit Care Med* 2000;161:353-359.
- 1198 (83) Marotta A, Klinnert MD, Price MR, Larsen GL, Liu AH. Impulse oscillometry provides an  
1199 effective measure of lung dysfunction in 4-year-old children at risk for persistent asthma. *J*  
1200 *Allergy Clin Immunol* 2003;112:317-322.
- 1201 (84) Knihtila H, Kotaniemi-Syrjanen A, Makela MJ, Bondestam J, Pelkonen AS, Malmberg LP.  
1202 Preschool oscillometry and lung function at adolescence in asthmatic children. *Pediatr Pulmonol*  
1203 2015.
- 1204 (85) Dencker M, Malmberg LP, Valind S et al. Reference values for respiratory system impedance by  
1205 using impulse oscillometry in children aged 2-11 years. *Clin Physiol Funct Imaging*  
1206 2006;26:247-250.
- 1207 (86) Bickel S, Popler J, Lesnick B, Eid N. Impulse oscillometry: interpretation and practical  
1208 applications. *Chest* 2014;146:841-847.
- 1209 (87) Saadeh C, Cross B, Saadeh C, Gaylor M. Retrospective observations on the ability to diagnose  
1210 and manage patients with asthma through the use of impulse oscillometry: comparison with  
1211 spirometry and overview of the literature. *Pulm Med* 2014;2014:376890.

- 1212 (88) Sarria EE, Mattiello R, Yao W et al. Atopy, cytokine production, and airway reactivity as  
1213 predictors of pre-school asthma and airway responsiveness. *Pediatr Pulmonol* 2014;49:132-  
1214 139.
- 1215 (89) Ramsey BW, Davies J, McElvaney NG et al. A CFTR potentiator in patients with cystic fibrosis  
1216 and the G551D mutation. *N Engl J Med* 2011;365:1663-1672.

# Statistical Analysis Plan: VCSIP Follow-up through 5 years of age

## Airway Function Outcomes: Covariates and Stratification

The statistical analysis of the FEFs performed at 5 years of age will be based on intention to treat. We will analyze the FEFs in infants born to mothers randomized to vitamin C versus placebo, using analysis of covariance general linear models. Included in these models will be treatment arm, clinical site, and gestational age at randomization (see Table 1) and the covariates race (using mothers' race as a binary variable i.e. white/non-white), infant's sex, and length at the time of the 5 year old airway function testing.

Table 1. Randomization Strata

|      | Gestational age at randomization |                      |
|------|----------------------------------|----------------------|
|      | <u>≤ 18 weeks</u>                | <u>&gt; 18 weeks</u> |
| OHSU | Strata 1                         | Strata 2             |
| SWW  | Strata 3                         | Strata 4             |
| IU   | Strata 5                         | Strata 6             |

## Primary Outcome: FEF<sub>25-75</sub> at Five Year Airway Function Testing

**Forced expiratory flow at 25-75% of expired volume, (FEF<sub>25-75</sub>)** measured at 5 years of age with spirometry in infants born to mothers randomized to vitamin C versus placebo is the primary outcome. The statistical analysis of airway function tests will be based on intention to treat. General linear mixed model, analysis of covariance (ANCOVA) will be used to compare the FEF<sub>25-75</sub> at the 5-year-old time point between treatment groups. Included in these models will be treatment arm, clinical site, and gestational age at randomization (≤18 vs >18 weeks) and the covariates of infant sex, maternal race, and infant length at testing. We will initially examine the distribution of each outcome variable using the Shapiro Wilk test and apply data transformations if indicated. If there is a significant difference among the strata at the significance level of 0.05, interaction between study sites and gestational age at randomization, the interaction term will be included in the model and differences will be reported. If the randomization stratum is not statistically significant, sites and gestational age at randomization will be added in the analysis as additive variables. The 5-year completed population will be used for this analysis. These are children who had technically acceptable spirometry tests between their 5<sup>th</sup> and 6<sup>th</sup> birthday.

## Secondary Outcomes:

### Other additional Airway Function Tests measured at 5 Years of Age

Using a similar statistical analysis plan as for the primary outcome of FEF<sub>25-75</sub> at the 5 year AFT, we will explore differences between infants in the two allocation groups for the additional spirometric outcomes of: FEF at 50% of expiration (FEF<sub>50</sub>), FEF at 75% of expiration (FEF<sub>75</sub>), forced expired volume in 1.0 seconds (FEV<sub>1.0</sub>), forced vital capacity (FVC), and FEV<sub>1.0</sub> / FVC at the 5 year spirometry test. Inspiratory resistance (Ri) measured at 8 Hz by forced oscillometry testing and will be analyzed as above at 5 years of age.

## **VCSIP Renewal Analysis Plan for Clinical Secondary Outcomes**

All analyses of secondary clinical outcomes will be performed using the intention-to-treat (ITT) paradigm, unless specifically stated.

We will adjust for the covariates that affect pulmonary function in infants: mother's race (as a binary variable – white versus non-white), infant's sex, and the randomization strata (study site and gestational age stratification at randomization). Infant length and corrected gestational age will not be included as covariates as they pertain to a point in time. To compare the incidence of current and recurrent wheeze and other clinical outcomes between the children of randomized smokers, we will use data obtained quarterly from the same validated respiratory questionnaire (RQ) that was administered during the VCSIP1 and from clinician reports.

### **A. Definition/Identification of Current Wheeze through Five Years of Age**

The primary clinical outcome of the trial will be current wheeze. While the origins of asthma likely start perinatally, making a definite diagnosis of asthma is difficult even by 5 years of age, and wheezing illnesses may precede an asthma diagnosis. Two hundred and thirteen children were reconsented back into this renewal study from the VCSIP1 trial. To be included in this analysis of current wheeze, the child had to have at least one respiratory questionnaire completed after their fourth birthday.

The composite outcome of current wheeze will be defined as any report of wheeze or the use of an asthma medication or the diagnosis of asthma in the child between the 4<sup>th</sup> and up to the 6<sup>th</sup> birthday. This includes a positive response to any of the following questions obtained from the administered respiratory questionnaire (Question numbers below refer to numbering from this questionnaire)

- Parental report of wheeze on any respiratory questionnaire administered between 4<sup>th</sup> and 6<sup>th</sup> birthday. These questions start with the preface of “since the last time we talked, OR in the last 12 months:
  - Questions that will be summarized include:
    - Q1. “Has your child had wheezing or whistling in the chest?”
- Healthcare provider diagnosis of wheeze
  - Questions that will be summarized include:
    - Q2. “Has a health care provider (HCP) said your child has wheezy or asthmatic bronchitis?”
    - Q3. “Has a HCP said your child has asthma?”
    - Q14. “Has your child had bronchitis or bronchiolitis?”
    - Q18 “Has your child had to stay overnight in the hospital for any reason..?”
      - Bronchitis and bronchiolitis, wheezing illness, asthma or asthma exacerbation
    - Q 19. “...has your child been seen by a HCP...wheezing, asthma, or wheezy or asthmatic bronchitis...emergency room, doctor's office, urgent care or clinic?”
- Bronchodilator or steroid inhaler/oral use (from chart review and parental report)
  - Questions that will be summarized include:
    - Q4. “Has your child been given medication for wheezing, asthmatic bronchitis, asthma?”
    - Q10b. “Has your child been given any medicine for a cough...when he/she does not have a cold?”
    - Q10b1. “Which of the following types of medications for a cough without a cold: bronchodilators, steroid inhalers, leukotriene modifiers, steroid pills, ..”
    - Q 17. “Has you child been given any medication other than those that we have already asked you about?”
    - Q18b. Nebulizer or inhaler treatment in hospital?

86 A positive answer to any of the above from the respiratory questionnaire administered between the  
87 child's fourth and sixth birthday will count as an incidence of wheezing. A negative response to *all*  
88 components will indicate that wheezing did not occur.  
89

90 We will compare the occurrence of current wheeze between infants in the vitamin C and placebo  
91 groups using this composite variable in a generalized linear mixed model ANCOVA. Randomization  
92 and covariates as outlined above will also be included in this analysis. Refer to Appendix 1 for a  
93 break out of all variables included in the combined current wheeze variable.  
94

95

96

97

98

99

100

101

102

103

104

105

106

107

108

109

110

111

112

113

114

115

116

117

118

119

120



## APPENDIX 1 – Wheeze Outcome Variable

The composite wheeze variable consists of the following variables collected on the quarterly Infant Respiratory Questionnaire :

| Field Label                                                                                                                                                                                                                                                                                       | Response Required/ Composite Notes (which to count)                                                                                                                                                                                                                                        |
|---------------------------------------------------------------------------------------------------------------------------------------------------------------------------------------------------------------------------------------------------------------------------------------------------|--------------------------------------------------------------------------------------------------------------------------------------------------------------------------------------------------------------------------------------------------------------------------------------------|
| <b>PARENTAL REPORT</b>                                                                                                                                                                                                                                                                            |                                                                                                                                                                                                                                                                                            |
| 1. Since [birth/the last time we talked] has your child had wheezing or whistling in his/her chest?                                                                                                                                                                                               | Any yes, ever. Include an overall count of individuals that answered yes as well as a second count of individuals that reported yes 2 or more times                                                                                                                                        |
| 14. Has child had any of the following illnesses?                                                                                                                                                                                                                                                 | 14c. Bronchitis=1 (Yes)<br>14d. Bronchiolitis=1 (Yes)                                                                                                                                                                                                                                      |
| <b>HEALTHCARE PROVIDER</b>                                                                                                                                                                                                                                                                        |                                                                                                                                                                                                                                                                                            |
| 2. Since [birth/the last time we talked] has a health care provider said that your child has wheezy or asthmatic bronchitis?                                                                                                                                                                      | Response = 1 (Yes)                                                                                                                                                                                                                                                                         |
| 3. Since [birth/the last time we talked] has a health care provider said that your child has asthma?                                                                                                                                                                                              | Response = 1 (Yes)                                                                                                                                                                                                                                                                         |
| 18. Reason for hospitalization code                                                                                                                                                                                                                                                               | Response = 3 (Bronchitis) or 4 (Bronchiolitis) or 5 (Wheezing) or 8 (Asthma/asthma exacerbation)                                                                                                                                                                                           |
| 19. Not counting hospitalizations, has [CHILD] been seen by a doctor or health care provider because of problems with wheezing, asthma, or wheezy or asthmatic bronchitis, since [birth/the last time we talked]? Include visits to an emergency room, a doctor's office, urgent care, or clinic. | Response = 1 (Yes)                                                                                                                                                                                                                                                                         |
| <b>MEDICATION USE</b>                                                                                                                                                                                                                                                                             |                                                                                                                                                                                                                                                                                            |
| 4a. Since the last time we talked, OR in the last 12 months, which of the following types of medication has child been given?                                                                                                                                                                     | 4a1. Bronchodilator inhalers/nebulizers, pills, or syrups= 1 (Yes)<br>4a2. Steroid inhalers/nebulizers= 1 (Yes)<br>4a3. Leukotriene modifiers=1 (Yes)<br>4a4. Steroid pills or liquids= 1 (Yes)<br>4a6a. If other, specify medication types. Refer to wheeze_med___1=1 (Checked)           |
| 10b. Has child been given any medicine for a cough when he/she did not have a cold?                                                                                                                                                                                                               | 10b1a. Bronchodilator inhalers/nebulizers, pills, or syrups= 1 (Yes)<br>10b1b. Steroid inhalers/nebulizers= 1 (Yes)<br>10b1c. Leukotriene modifiers=1 (Yes)<br>10b1d. Steroid pills or liquids= 1 (Yes)<br>10b1f . If other, specify medication types. Refer to wheeze_med___1=1 (Checked) |
| 17. Specify other medications [1]                                                                                                                                                                                                                                                                 | refer to wheeze_med___1= 1 (Checked)                                                                                                                                                                                                                                                       |

| Field Label                                               | Response Required/ Composite Notes (which to count) |
|-----------------------------------------------------------|-----------------------------------------------------|
| 18c. Nebulizer/Inhaler (breathing) Treatment in Hospital? | Response = 1 (Yes)                                  |
| If Other medication was used, medication was              | Response = 1 (Yes)                                  |

125 [1] Other medications: albuterol, albuterol nebulizer, pills, or syrups, steroid inhalers, nebulizers, leukotriene modifiers, steroid pills or  
126 liquids

127

128 References:

129 1.Ferris BG. Epidemiology Standardization Project (American Thoracic Society). *Am Rev Respir Dis*  
130 1978;118:1-120.

131 2.Litonjua AA, Carey VJ, Laranjo N et al. Effect of Prenatal Supplementation With Vitamin D on Asthma or  
132 Recurrent Wheezing in Offspring by Age 3 Years: The VDAART Randomized Clinical Trial. *JAMA*  
133 2016;315(4):362-370.

134

135

136

137

138
