# Supplementary material
Source: PubMed Central journal article supplement (PMC9679962)
Supplement: jamapediatr-e224401-s003.pdf [file jamapediatr-e224401-s003.pdf]

## Supplementary Online Content

McEvoy CT, Shorey-Kendrick LE, Milner K, et al. Effect of vitamin C supplementation for pregnant smokers on offspring airway function and wheeze at age 5 years: follow-up of a randomized clinical trial. *JAMA Pediatr*. Published online November 21, 2022. doi:10.1001/jamapediatrics.2022.4401

**eTable 1.** Wheeze Outcome Variables

**eReferences**

**eTable 2.** Characteristics of Children With Completed 12-Month and 5-Year Pulmonary and/or Airway Function Test Results

This supplementary material has been provided by the authors to give readers additional information about their work.

**eTable 1. Wheeze Outcome Variables**

The wheeze outcome quantified between the child’s 4<sup>th</sup> and 6<sup>th</sup> birthday was obtained from the following specific questions contained on the standardized respiratory questionnaire<sup>1,2</sup> which was administered quarterly to the child’s primary caretaker. A positive response to any of these questions on one or more respiratory questionnaire was recorded as a positive for the wheeze outcome. (The numbers below refer to the question number on the respiratory questionnaire and are organized by source: parental report; healthcare provider; medication use)

| Field Label                                                                                                                                                                                                                                                                                       | Response Required/ Composite Notes (which to count)                                                                                                                                             |
|---------------------------------------------------------------------------------------------------------------------------------------------------------------------------------------------------------------------------------------------------------------------------------------------------|-------------------------------------------------------------------------------------------------------------------------------------------------------------------------------------------------|
| <b>PARENTAL REPORT</b>                                                                                                                                                                                                                                                                            |                                                                                                                                                                                                 |
| 1. Since [birth/the last time we talked] has your child had wheezing or whistling in his/her chest?                                                                                                                                                                                               | Any yes, ever. Include an overall count of individuals that answered yes as well as a second count of individuals that reported yes 2 or more times                                             |
| 14. Has child had any of the following illnesses?                                                                                                                                                                                                                                                 | 14c. Bronchitis=1 (Yes)<br>14d. Bronchiolitis=1 (Yes)                                                                                                                                           |
| <b>HEALTHCARE PROVIDER</b>                                                                                                                                                                                                                                                                        |                                                                                                                                                                                                 |
| 2. Since [birth/the last time we talked] has a health care provider said that your child has wheezy or asthmatic bronchitis?                                                                                                                                                                      | Response = 1 (Yes)                                                                                                                                                                              |
| 3. Since [birth/the last time we talked] has a health care provider said that your child has asthma?                                                                                                                                                                                              | Response = 1 (Yes)                                                                                                                                                                              |
| 18. Reason for hospitalization code                                                                                                                                                                                                                                                               | Response = 3 (Bronchitis) or 4 (Bronchiolitis) or 5 (Wheezing) or 8 (Asthma/asthma exacerbation)                                                                                                |
| 19. Not counting hospitalizations, has [CHILD] been seen by a doctor or health care provider because of problems with wheezing, asthma, or wheezy or asthmatic bronchitis, since [birth/the last time we talked]? Include visits to an emergency room, a doctor's office, urgent care, or clinic. | Response = 1 (Yes)                                                                                                                                                                              |
| <b>MEDICATION USE</b>                                                                                                                                                                                                                                                                             |                                                                                                                                                                                                 |
| 4a. Since the last time we talked, OR in the last 12 months, which of the following types of medication has child been given?                                                                                                                                                                     | 4a1. Bronchodilator inhalers/nebulizers, pills, or syrups= 1 (Yes)<br>4a2. Steroid inhalers/nebulizers= 1 (Yes)<br>4a3. Leukotriene modifiers=1 (Yes)<br>4a4. Steroid pills or liquids= 1 (Yes) |

| Field Label                                                                         | Response Required/ Composite Notes (which to count)                                                                                                                                                                                                                                        |
|-------------------------------------------------------------------------------------|--------------------------------------------------------------------------------------------------------------------------------------------------------------------------------------------------------------------------------------------------------------------------------------------|
|                                                                                     | 4a6a. If other, specify medication types. Refer to wheeze_med___1=1 (Checked)                                                                                                                                                                                                              |
| 10b. Has child been given any medicine for a cough when he/she did not have a cold? | 10b1a. Bronchodilator inhalers/nebulizers, pills, or syrups= 1 (Yes)<br>10b1b. Steroid inhalers/nebulizers= 1 (Yes)<br>10b1c. Leukotriene modifiers=1 (Yes)<br>10b1d. Steroid pills or liquids= 1 (Yes)<br>10b1f . If other, specify medication types. Refer to wheeze_med___1=1 (Checked) |
| 17. Specify other medications [1]                                                   | refer to wheeze_med___1= 1 (Checked)                                                                                                                                                                                                                                                       |
| 18c. Nebulizer/Inhaler (breathing) Treatment in Hospital?                           | Response = 1 (Yes)                                                                                                                                                                                                                                                                         |
| If Other medication was used, medication was                                        | Response = 1 (Yes)                                                                                                                                                                                                                                                                         |

[1] Other medications: albuterol, albuterol nebulizer, pills, or syrups, steroid inhalers, nebulizers, leukotriene modifiers, steroid pills or liquids

## eReferences

1. Ferris BG. Epidemiology Standardization Project (American Thoracic Society). *Am Rev Respir Dis* 1978;118:1-120.
2. Litonjua AA, Carey VJ, Laranjo N et al. Effect of Prenatal Supplementation With Vitamin D on Asthma or Recurrent Wheezing in Offspring by Age 3 Years: The VDAART Randomized Clinical Trial. *JAMA* 2016;315(4):362-370.

**eTable 2.** Characteristics of Children With Completed 12-Month and 5-Year Pulmonary and/or Airway Function Test Results

|                                                     | <b>12 Month AFT</b> | <b>5 Year AFT</b> |
|-----------------------------------------------------|---------------------|-------------------|
|                                                     | (n=202)             | (n=192)           |
| Race, n (%)                                         |                     |                   |
| White                                               | 162 (80.2)          | 151 (78.6)        |
| Non-white                                           | 40 (19.8)           | 41 (21.4)         |
| Ethnicity, n (%)                                    |                     |                   |
| Hispanic or Latino                                  | 8 (4.0)             | 5 (2.6)           |
| Non-Hispanic or Latino                              | 193 (95.5)          | 186 (96.9)        |
| Unknown or not reported                             | 1 (0.5)             | 1 (0.5)           |
| Gestational age at randomization (weeks), Mean (SD) | 18.3 (2.9)          | 18.3 (2.8)        |
| Public Health Insurance, n (%)                      | 173 (85.6)          | 167 (87.0)        |
| Maternal Education, of $\leq$ High School, n (%)    | 122 (60.4)          | 110 (57.3)        |
| Maternal asthma, n (%)                              | 67 (33.2)           | 63 (32.8)         |
| Gestational age at birth (weeks), Mean (SD)         | 38.3 (1.8)          | 38.3 (1.8)        |
| Infant birthweight (kg), Mean (SD)                  | 3107.2 (527)        | 3127 (526)        |
| Female sex, n (%)                                   | 98 (48.5)           | 96 (50.0)         |
