# Supplementary material
Source: PubMed Central journal article supplement (PMC9679962)
Supplement: jamapediatr-e224401-s004.pdf [file jamapediatr-e224401-s004.pdf]

## Data Sharing Statement

McEvoy. Effect of Vitamin C Supplementation for Pregnant Smokers on Offspring Airway Function and Wheeze at Age 5 Years. *JAMA Pediatr.* Published November 21, 2022. doi:10.1001/jamapediatrics.2022.4401

### Data

**Data available:** Yes

**Data types:** Deidentified participant data, Data dictionary

**How to access data:** [DCC@ohsu.edu](mailto:DCC@ohsu.edu)

**When available:** With publication

### Supporting Documents

**Document types:** Statistical/analytic code, Informed consent form

**How to access documents:** [DCC@ohsu.edu](mailto:DCC@ohsu.edu)

**When available:** With publication

### Additional Information

**Who can access the data:** The data will be available to researchers who provide a methodologically sound proposal to achieve the aims in the approved proposal

**Types of analyses:** Researchers whose proposed use of the data has been approved. Primarily for verification.

**Mechanisms of data availability:** With a signed data access agreement

**Any additional restrictions:** Authors can refuse data release request
